# Supplementary material for: Direct access to acylated quinoxalin-2(1H)-one N-oxides enabled by the Cu(i)/TBHP system
Source: Royal Society of Chemistry journal article supplement (doi:10.1039/d4nj04823g), 2025-01-01
Supplement: d4nj04823g2.pdf [file d4nj04823g2.pdf]

# Supporting Information

## Direct Access to Acylated Quinoxalin-2(1*H*)-one *N*-oxides Enabled by Cu(I)/TBHP System

Jianxiong Xu, Xue Gong, Zhirui Wu, Weimin Huang, Jizhen Li\*

Department of Organic Chemistry, College of Chemistry, Jilin University, 2519 Jiefang Road,  
Changchun, 130021, P. R. China

**Corresponding author:**

**E-mail:** [ljz@jlu.edu.cn](mailto:ljz@jlu.edu.cn) (Jizhen Li)

## Contents

|                                                          |     |
|----------------------------------------------------------|-----|
| 1. General information .....                             | S3  |
| 2. Preparation of starting materials .....               | S4  |
| 3. Experimental section.....                             | S5  |
| 4. X-Ray structure and data of compound <b>3ja</b> ..... | S7  |
| 5. Mechanism investigation .....                         | S9  |
| 6. Exploration of further application .....              | S11 |
| 7. Characterization data of products .....               | S13 |
| 8. <sup>1</sup> H and <sup>13</sup> C NMR spectra.....   | S22 |
| 9. LC-MS spectra.....                                    | S47 |

## 1. General information

All reagents and starting materials were purchased from commercial sources and used without treatment unless otherwise indicated. All the solvents were dried and re-distilled upon use. NMR spectra were obtained on a Bruker AMX 400 system using chloroform-*d* (CDCl<sub>3</sub>) as solvent. The <sup>1</sup>H-NMR and <sup>13</sup>C-NMR spectra were recorded at 400 MHz and 100 MHz respectively. All chemical shifts were given in ppm with TMS at 0.0 ppm, and all coupling constants (*J* values) were reported in Hertz (Hz). Liquid Chromatography- High- Resolution Mass Spectrometry was recorded on the Bruker MicrOTOF QII instrument. Column chromatography was performed on silica gel (100-200 mesh or 200-300 mesh) with ethyl acetate and petroleum ether as eluents.

## 2. Preparation of starting materials

Step 1 Typical procedure: Potassium carbonate (6.0 mmol, 1.2 equiv.) and the corresponding halide (8.0 mmol, 1.6 equiv.) were added into a solution of quinoxalin-2(1*H*)-ones (5.0 mmol, 1.0 equiv.) in DMF (25 mL). The reaction mixture was stirred at room temperature overnight. Then water was added and the resulting mixture was extracted with ethyl acetate three times. The combined organic layers were washed with saturated solution of NH<sub>4</sub>Cl and NaCl respectively, then dried over Na<sub>2</sub>SO<sub>4</sub>, filtered and evaporated under reduced pressure.<sup>1</sup> The residue was purified by column chromatography on silica gel to obtain the desired products **1a** to **1i**.

Step 2 Typical procedure: Ethyl 2-oxoacetate (5.5 mmol, 1.1 equiv.) was added into a suspension of substituted *ortho*-phenylenediamine (5.0 mmol, 1.0 equiv.) in ethanol (25 mL). The mixture was stirred at reflux for 4 h, then stirred at room temperature overnight.<sup>2</sup> The precipitated solid was filtered and washed with ethanol, then dried over Na<sub>2</sub>SO<sub>4</sub> to give substituted quinoxalinone. Then, the obtained compound was subjected to the procedure as described in step 1) to yield the expected products **1j-1l**.

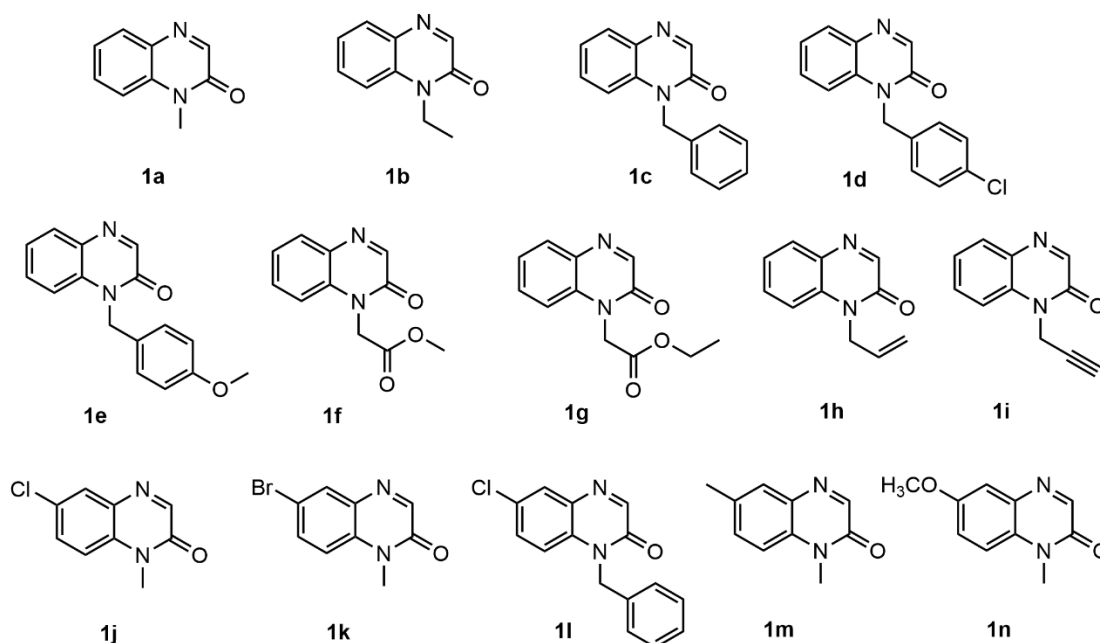

**Figure S1** Reacted substrates.

[1] K. Zhang, J. Xu, J. Xiao, R. Zhong, J. Li, *Eur. J. Org. Chem.*, 2023, **26**, e202201432.

[2] J. W. Yuan, J. H. Fu, S. N. Liu, Y. M. Xiao, P. Mao, L. B. Qu, *Org. Biomol. Chem.*, 2018, **16**, 3203-3212.

### 3. Experimental section

#### 3.1 Screening the reaction conditions

Table S1 Screening the reaction conditions <sup>[a]</sup>

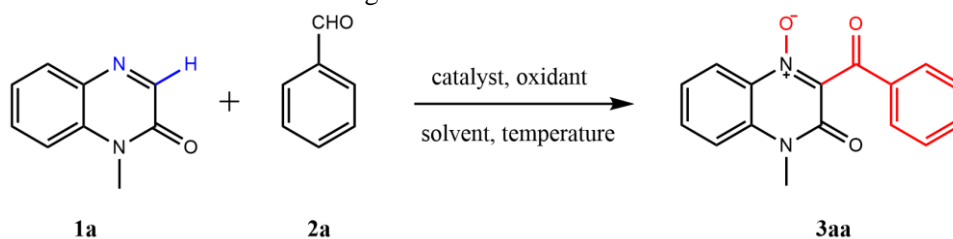

| Entry             | catalyst                             | solvent                         | T (°C)    | t (h)     | Yield <sup>b</sup> (%) |
|-------------------|--------------------------------------|---------------------------------|-----------|-----------|------------------------|
| 1                 | CuCl                                 | EtOAc                           | 70        | 12        | 24                     |
| 2                 | Cu(OAc) <sub>2</sub>                 | EtOAc                           | 70        | 12        | 16                     |
| 3                 | CuCl <sub>2</sub> ·2H <sub>2</sub> O | EtOAc                           | 70        | 12        | trace                  |
| 4                 | CuBr                                 | EtOAc                           | 70        | 12        | 22                     |
| 5                 | CuI                                  | EtOAc                           | 70        | 12        | 19                     |
| 6                 | NiCl <sub>2</sub>                    | EtOAc                           | 70        | 12        | 8                      |
| 7                 | Ni(OTf) <sub>2</sub>                 | EtOAc                           | 70        | 12        | trace                  |
| 8                 | NiSO <sub>4</sub>                    | EtOAc                           | 70        | 12        | trace                  |
| 9                 | FeCl <sub>3</sub>                    | EtOAc                           | 70        | 12        | trace                  |
| 10                | FeSO <sub>4</sub>                    | EtOAc                           | 70        | 12        | 10                     |
| 11 <sup>[c]</sup> | CuCl                                 | EtOAc                           | 70        | 12        | n.r                    |
| 12 <sup>[d]</sup> | CuCl                                 | EtOAc                           | 70        | 12        | n.r                    |
| 13 <sup>[e]</sup> | CuCl                                 | EtOAc                           | 70        | 12        | n.r                    |
| 14 <sup>[f]</sup> | CuCl                                 | EtOAc                           | 70        | 12        | n.r                    |
| 15 <sup>[g]</sup> | CuCl                                 | EtOAc                           | 70        | 12        | 21                     |
| 16 <sup>[h]</sup> | CuCl                                 | EtOAc                           | 70        | 12        | 20                     |
| 17                | CuCl                                 | DCM                             | 70        | 12        | 17                     |
| 18                | CuCl                                 | DCE                             | 70        | 12        | 14                     |
| 19                | CuCl                                 | PhCF <sub>3</sub>               | 70        | 12        | 15                     |
| 20                | CuCl                                 | HFIP                            | 70        | 12        | 19                     |
| 21                | CuCl                                 | DMF                             | 70        | 12        | n.r                    |
| 22                | CuCl                                 | DMSO                            | 70        | 12        | trace                  |
| 23                | CuCl                                 | CH <sub>3</sub> NO <sub>2</sub> | 70        | 12        | 7                      |
| 24                | CuCl                                 | THF                             | 70        | 12        | trace                  |
| 25                | CuCl                                 | TFE                             | 70        | 12        | trace                  |
| 26                | CuCl                                 | PhCH <sub>3</sub>               | 70        | 12        | 11                     |
| 27                | CuCl                                 | 1,4-dioxane                     | 70        | 12        | trace                  |
| 28                | CuCl                                 | CHCl <sub>3</sub>               | 70        | 12        | 14                     |
| 29                | CuCl                                 | EtOAc                           | 70        | 12        | 5                      |
| 30                | CuCl                                 | CH <sub>3</sub> CN              | 70        | 12        | 9                      |
| 31                | CuCl                                 | EtOAc                           | 60        | 12        | 18                     |
| 32                | CuCl                                 | EtOAc                           | 80        | 12        | 29                     |
| 33                | CuCl                                 | EtOAc                           | 90        | 12        | 25                     |
| 34                | CuCl                                 | EtOAc                           | 100       | 12        | 14                     |
| 35                | CuCl                                 | EtOAc                           | 80        | 6         | 17                     |
| 36                | CuCl                                 | EtOAc                           | 80        | 24        | 42                     |
| <b>37</b>         | <b>CuCl</b>                          | <b>EtOAc</b>                    | <b>80</b> | <b>36</b> | <b>55</b>              |
| 38                | CuCl                                 | EtOAc                           | 80        | 48        | 50                     |
| 39 <sup>[i]</sup> | CuCl                                 | EtOAc                           | 80        | 36        | 52                     |
| 40 <sup>[j]</sup> | CuCl                                 | EtOAc                           | 80        | 36        | 53                     |
| 41 <sup>[k]</sup> | CuCl                                 | EtOAc                           | 80        | 12        | 6                      |
| 42 <sup>[l]</sup> | CuCl                                 | EtOAc                           | 80        | 12        | 15                     |
| 43 <sup>[m]</sup> | CuCl                                 | EtOAc                           | 80        | 12        | 22                     |
| 44 <sup>[n]</sup> | CuCl                                 | EtOAc                           | 80        | 12        | 26                     |

<sup>[a]</sup> Reaction conditions: **1a** (0.2 mmol, 1.0 equiv.), **2a** (1.0 mmol, 5.0 equiv.), TBHP (5.0-6.0 mol/L)

in decane, 8.0 equiv.), catalyst (0.1 equiv.), MeCN (1.0 mL), solvent (1.0 mL) in sealed tube. <sup>[b]</sup> Isolated yield. <sup>[c]</sup> DTBP. <sup>[d]</sup> K<sub>2</sub>S<sub>2</sub>O<sub>8</sub>. <sup>[e]</sup> (NH<sub>4</sub>)<sub>2</sub>S<sub>2</sub>O<sub>8</sub>. <sup>[f]</sup> no TBHP. <sup>[g]</sup> TBHP (5.0-6.0 mol/L in decane, 7.0 equiv.). <sup>[h]</sup> TBHP (5.0-6.0 mol/L in decane, 9.0 equiv.). <sup>[i]</sup> under N<sub>2</sub>. <sup>[j]</sup> under O<sub>2</sub>. <sup>[k]</sup> **2a** (0.4 mmol, 2.0 equiv.), <sup>[l]</sup> **2a** (0.6 mmol, 3.0 equiv.), <sup>[m]</sup> **2a** (0.8 mmol, 4.0 equiv.), <sup>[n]</sup> **2a** (1.2 mmol, 6.0 equiv.).

### 3.2 General procedure for the synthesis of target compounds

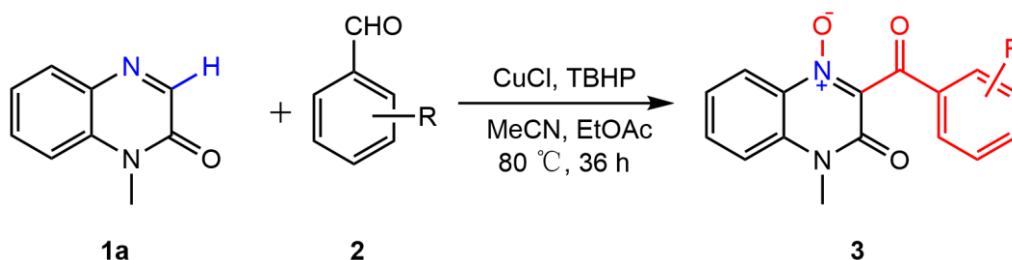

Quinoxalin-2(1*H*)-one **1a** (0.1 mmol, 1.0 equiv.), aromatic aldehyde **2** (0.5 mmol, 5.0 equiv.), CuCl (0.01 mmol, 0.1 equiv.), TBHP (0.8 mmol, 8.0 equiv.), were added into the solution of MeCN (1.0 mL) and EtOAc (1.0 mL) in a sealed tube under ambient condition. The reaction mixture was stirred and heated at 80 °C until the reaction completed (monitored by TLC). Then, the reaction mixture was cooled to room temperature and concentrated under reduced pressure. Subsequently, H<sub>2</sub>O was added to the residue, and the aqueous layer was extracted twice with ethyl acetate. The combined organic layers were dried with anhydrous Na<sub>2</sub>SO<sub>4</sub>, filtered and concentrated under reduced pressure. The resulting organic residue was purified by column chromatography (SiO<sub>2</sub>, petroleum ether/ethyl acetate gradient) to provide the products **3aa-3al**.

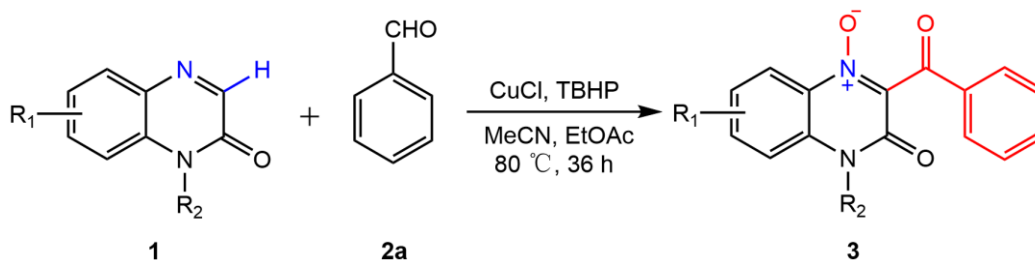

Substituted quinoxalinone **1** (0.1 mmol, 1.0 equiv.), benzaldehyde **2a** (0.5 mmol, 5.0 equiv.), CuCl (0.01 mmol, 0.1 equiv.), TBHP (0.8 mmol, 8.0 equiv.), were added into the solution of MeCN (1.0 mL) and EtOAc (1.0 mL) in a sealed tube under ambient condition. The reaction mixture was stirred and heated at 80 °C until the

reaction completed (monitored by TLC). Then, the reaction mixture was cooled to room temperature and concentrated under reduced pressure. Subsequently, H<sub>2</sub>O was added to the residue, and the aqueous layer was extracted twice with ethyl acetate. The combined organic layers were dried with anhydrous Na<sub>2</sub>SO<sub>4</sub>, filtered and concentrated under reduced pressure. The resulting organic residue was purified by column chromatography (SiO<sub>2</sub>, petroleum ether/ethyl acetate gradient) to provide the products **3ba-3la**.

### 3.3 Unreacted substrates

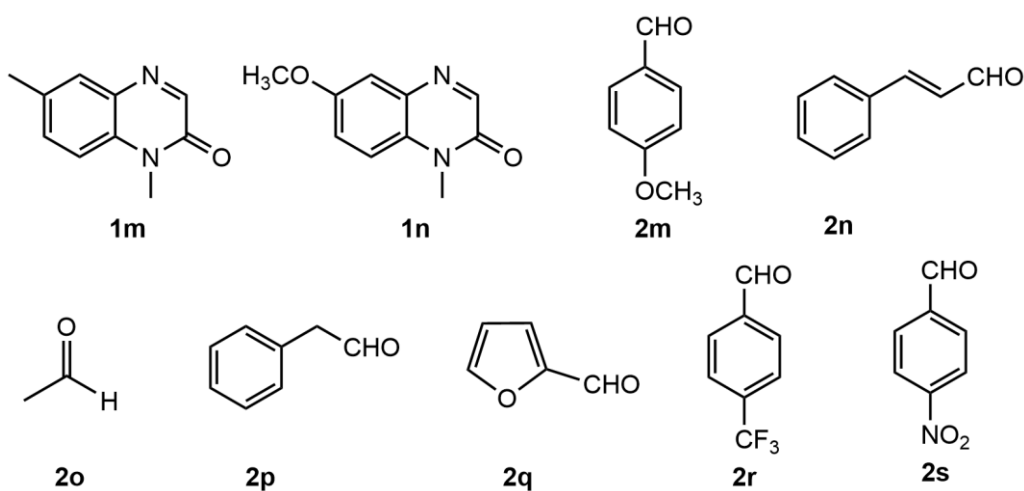

Figure S2 Unreacted substrates.

### 4. X-Ray structure and data of compound **3ja**

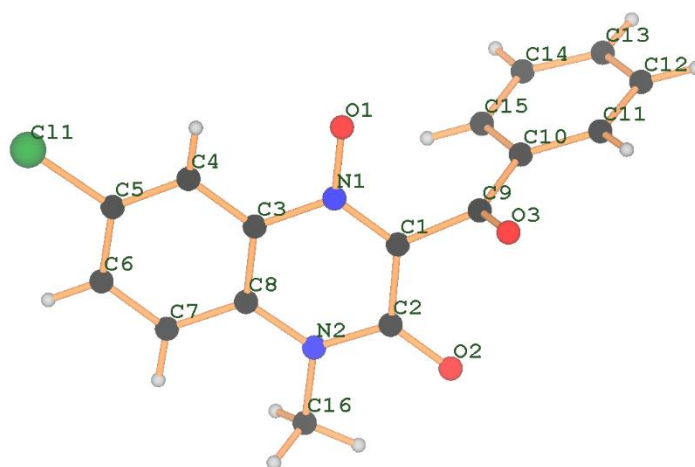

Figure S3 Crystal structure of **3ja**

|                                    |                                                                              |                                                                                        |              |
|------------------------------------|------------------------------------------------------------------------------|----------------------------------------------------------------------------------------|--------------|
| Bond precision:                    | C-C = 0.0033 Å                                                               | Wavelength=1.54178                                                                     |              |
| Cell:                              | a=11.5686(2)                                                                 | b=9.5602(2)                                                                            | c=29.2255(5) |
|                                    | alpha=90                                                                     | beta=96.480(1)                                                                         | gamma=90     |
| Temperature:                       | 180 K                                                                        |                                                                                        |              |
|                                    | Calculated                                                                   | Reported                                                                               |              |
| Volume                             | 3211.64(10)                                                                  | 3211.64(10)                                                                            |              |
| Space group                        | P 21/c                                                                       | P 1 21/c 1                                                                             |              |
| Hall group                         | -P 2ybc                                                                      | -P 2ybc                                                                                |              |
| Moiety formula                     | C <sub>16</sub> H <sub>11</sub> Cl N <sub>2</sub> O <sub>3</sub> [+solvent]  | C <sub>16</sub> H <sub>11</sub> ClN <sub>2</sub> O <sub>3</sub> , 0.5[CHCL3]           |              |
| Sum formula                        | C <sub>16</sub> H <sub>11</sub> Cl N <sub>2</sub> O <sub>3</sub> [+ solvent] | C <sub>16.50</sub> H <sub>11.50</sub> Cl <sub>2.50</sub> N <sub>2</sub> O <sub>3</sub> |              |
| MW                                 | 314.72                                                                       | 374.40                                                                                 |              |
| Dx (g cm <sup>-3</sup> )           | 1.302                                                                        | 1.549                                                                                  |              |
| Z                                  | 8                                                                            | 8                                                                                      |              |
| Mu (mm <sup>-1</sup> )             | 2.228                                                                        | 4.571                                                                                  |              |
| F000                               | 1296.0                                                                       | 1528.0                                                                                 |              |
| F000'                              | 1302.73                                                                      |                                                                                        |              |
| h,k,l <sub>max</sub>               | 13,10,33                                                                     | 13,10,33                                                                               |              |
| N <sub>ref</sub>                   | 5099                                                                         | 5098                                                                                   |              |
| T <sub>min</sub> ,T <sub>max</sub> | 0.665,0.796                                                                  | 0.529,0.752                                                                            |              |
| T <sub>min</sub> '                 | 0.603                                                                        |                                                                                        |              |
| Correction method=                 | # Reported T Limits: T <sub>min</sub> =0.529 T <sub>max</sub> =0.752         |                                                                                        |              |
|                                    | AbsCorr = MULTI-SCAN                                                         |                                                                                        |              |
| Data completeness= 1.000           | Theta(max)= 62.371                                                           |                                                                                        |              |
| R(reflections)= 0.0549 ( 3819)     | wR2(reflections)= 0.1556 ( 5098)                                             |                                                                                        |              |
| S = 1.041                          | N <sub>par</sub> = 352                                                       |                                                                                        |              |



## 5. Mechanism investigation

### Control experiments

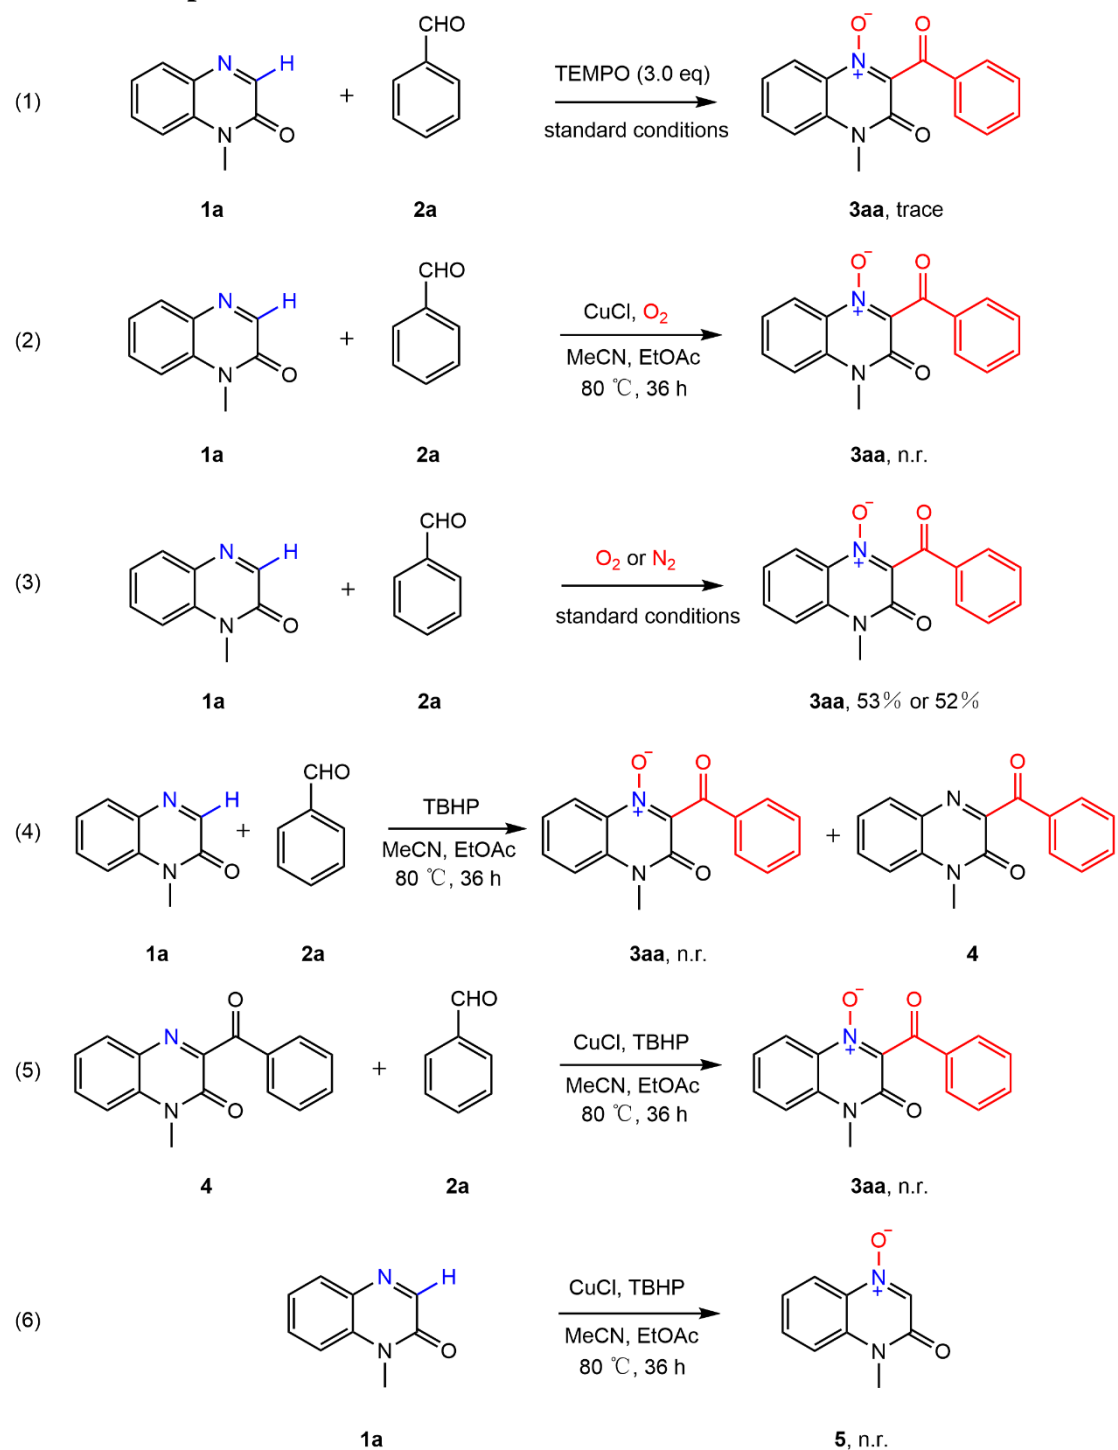

Scheme S1 Control experiments.

The reaction was sufficiently suppressed when TEMPO (2,2,6,6-tetramethyl-1-piperidinyloxy) (3.0 equiv.) was used as a radical inhibitor (Scheme S1, Eq. 1). When quinoline *N*-oxide **1a** was treated with benzaldehyde **2a** under oxygen atmosphere in the absence of TBHP, no desired product was detected (Scheme S1, Eq. 2). Whereas, the above reaction proceeded smoothly under nitrogen atmosphere (or oxygen atmosphere) using 8.0 equiv. TBHP as oxidant and provided the desired product **3aa** in 52% (or 53%) yield (Scheme S1, Eq. 3), which was close to the result under the optimal reaction conditions (entry 37, Table S1). These above results indicated that the reaction was insensitive to external gas and TBHP played an indispensable role in the construction of *N*-oxides. It was noted that product **3aa** was not detected and the non-oxidized benzoylation product **4** was obtained in the absence of CuCl (Scheme S1, Eq. 4). The reaction did not proceed at all when starting material **1a** was replaced by the compound **4** (Scheme S1, Eq. 5). The results exclude the possibility that compound **4** was involved as reactive intermediate in this transformation. The corresponding *N*-oxide **5** was not obtained under standard conditions (Scheme S1, Eq. 6), indicating that the process did not proceed via oxidation as the first step.

## 6. Exploration of further application

### (1) gram-scale reaction

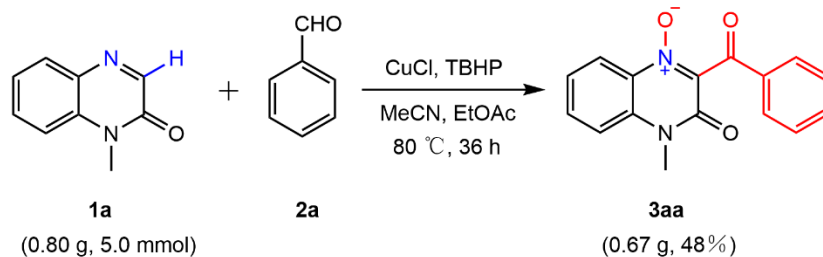

### (2) styrene substrate scope experiment

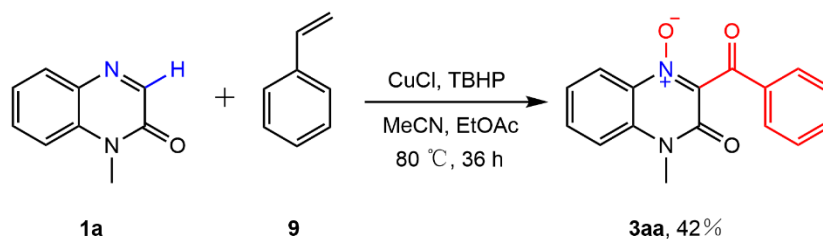

### (3) sodium trifluoromethanesulfinate substrate scope experiment

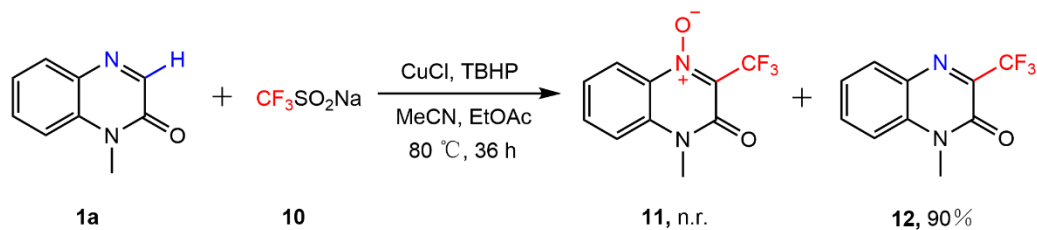

### (4) ammonium thiocyanate substrate scope experiment

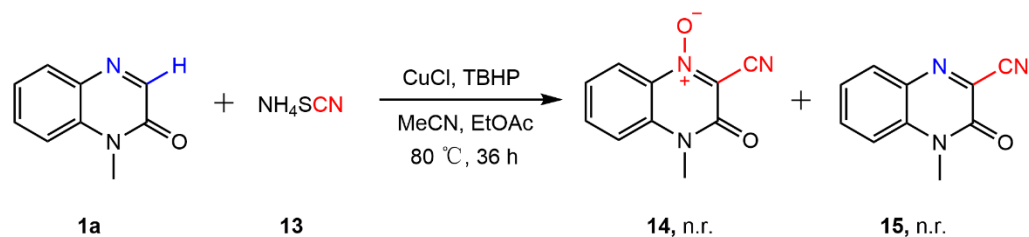

### (5) quinoxaline substrate scope experiment

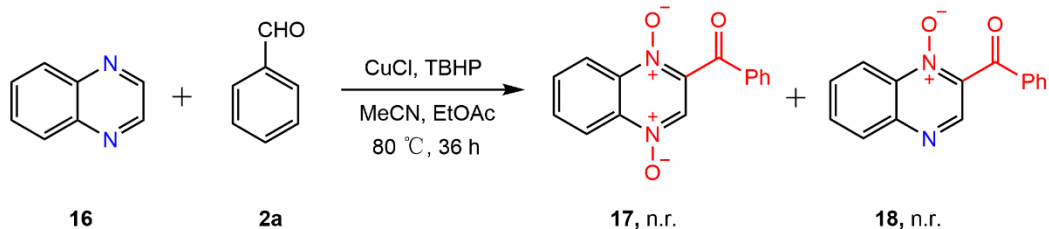

Scheme S2 Exploration of further application

A gram-scale reaction was performed to demonstrate the potential application, using **1a** and **2a** as model reactants (Scheme S2, Eq. 1). The scaled-up reaction proceeded well to form the product **3aa** in 48% yield. Styrene **9** also confirmed to be a suitable substrate for this protocol, and product **3aa** was obtained with a yield of 42% (Scheme S2, Eq. 2). The reaction involved the oxidation of styrene to produce benzaldehyde as reactive species. This also proves that aromatic alkenes are applicable in our experimental protocol. The sodium trifluoromethanesulfinate and ammonium thiocyanate were also assessed under standard conditions (Scheme S2, Eq. 3&4). Unfortunately, the quinoxalin-2(1*H*)-one *N*-oxidized trifluoromethylation product **11** and the *N*-oxidized cyanation product **14** were not detected. Only the trifluoromethylation product **12** was detected,<sup>3</sup> and the cyanation product **15** was not produced at all.<sup>4</sup> For quinoxaline **16**, no reaction occurred under standard conditions, and only the starting material remained in the reaction mixture (Scheme S2, Eq. 5). We speculated that the electron-withdrawing carbonyl group played important role in stabilizing the reactive intermediate in the reaction process. All these results demonstrated the potential application and the scope of reactants for our synthetic method.

[3] N. B. Dutta, J. Bori, P. Gogoi, Baishya G. *Chemistry Select.*, 2021, **6**, 1471-1477.

[4] J. Wang, B. Sun, L. Zhang, T. Xu, Y. Xie, C. Jin, *Org. Chem. Front.*, 2020, **7**, 113-118.

## 7. Characterization data of products

### 3aa

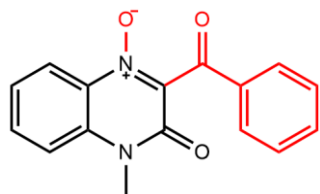

Yellow solid, isolated yield: 55 %; m.p: 115-116 °C;  $R_f$ = 0.30 (Ethyl acetate: Petroleum ether, 1:3 (v/v)).  $^1\text{H}$  NMR (400 MHz,  $\text{CDCl}_3$ )  $\delta$  8.44 (d,  $J$  = 8.4 Hz, 1H), 7.93 (d,  $J$  = 7.2 Hz, 2H), 7.79 (t,  $J$  = 7.9 Hz, 1H), 7.63 (t,  $J$  = 7.4 Hz, 1H), 7.51 – 7.43 (m, 4H), 3.75 (s, 3H).  $^{13}\text{C}$  NMR (100 MHz,  $\text{CDCl}_3$ )  $\delta$  186.72, 155.14, 135.34, 134.74, 134.72, 133.86, 133.63, 130.96, 129.16, 129.12, 124.23, 121.01, 114.87, 29.14. HRMS (ESI): m/z: calcd for  $[\text{M}+\text{H}]^+$   $\text{C}_{16}\text{H}_{13}\text{N}_2\text{O}_3$ : 281.0921, found: 281.0927.

### 3ab

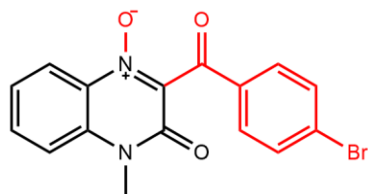

Yellow solid, isolated yield: 47 %; m.p: 123-124 °C;  $R_f$ = 0.25 (Ethyl acetate: Petroleum ether, 1:3 (v/v)).  $^1\text{H}$  NMR (400 MHz,  $\text{CDCl}_3$ )  $\delta$  8.42 (d,  $J$  = 8.4 Hz, 1H), 7.78 (d,  $J$  = 8.8 Hz, 3H), 7.63 (d,  $J$  = 8.6 Hz, 2H), 7.52 – 7.43 (m, 2H), 3.74 (s, 3H).  $^{13}\text{C}$  NMR (100 MHz,  $\text{CDCl}_3$ )  $\delta$  185.79, 155.06, 134.78, 133.89, 133.80, 133.57, 132.49, 130.94, 130.52, 130.10, 124.34, 121.01, 114.92, 29.18. HRMS (ESI): m/z: calcd for  $[\text{M}+\text{H}]^+$   $\text{C}_{16}\text{H}_{12}\text{BrN}_2\text{O}_3$ : 359.0026, found: 359.0036.

### 3ac

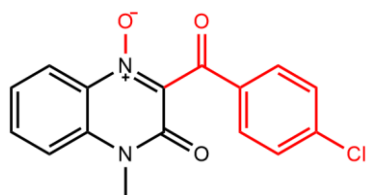

Yellow solid, isolated yield: 48 %; m.p: 128-129 °C;  $R_f$ = 0.25 (Ethyl acetate: Petroleum ether, 1:3 (v/v)).  $^1\text{H}$  NMR (400 MHz,  $\text{CDCl}_3$ )  $\delta$  8.43 (d,  $J$  = 7.4 Hz, 1H), 7.87 (d,  $J$  = 8.5 Hz, 2H), 7.79 (t,  $J$  = 7.2 Hz, 1H), 7.52 – 7.44 (m, 4H), 3.75 (s, 3H).  $^{13}\text{C}$  NMR (100 MHz,  $\text{CDCl}_3$ )  $\delta$  185.55, 155.07, 141.23, 134.83, 133.90, 133.78, 133.18, 130.96, 130.50, 129.51, 124.33, 121.03, 114.91, 29.17. HRMS (ESI): m/z: calcd for  $[\text{M}+\text{H}]^+$   $\text{C}_{16}\text{H}_{12}\text{ClN}_2\text{O}_3$ : 315.0531, found: 315.0536.

**3ad**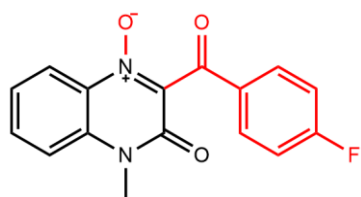

Yellow solid, isolated yield: 53 %; m.p: 117-118 °C;  $R_f$ = 0.20 (Ethyl acetate: Petroleum ether, 1:3 (v/v)).  $^1\text{H}$  NMR (400 MHz,  $\text{CDCl}_3$ )  $\delta$  8.43 (d,  $J$  = 8.4 Hz, 1H), 7.98 – 7.94 (m, 2H), 7.79 (t,  $J$  = 7.9 Hz, 1H), 7.52 – 7.44 (m, 2H), 7.17 (t,  $J$  = 8.6 Hz, 2H), 3.75 (s, 3H).  $^{13}\text{C}$  NMR (100 MHz,  $\text{CDCl}_3$ )  $\delta$  185.11, 166.72 (d,  $J$  = 255.8 Hz), 155.09, 133.88, 133.72, 132.02, 131.93, 131.30 (d,  $J$  = 2.8 Hz), 130.97, 124.31, 121.05, 116.45 (d,  $J$  = 22.2 Hz), 114.88, 29.16. HRMS (ESI):  $m/z$ : calcd for  $[\text{M}+\text{H}]^+$   $\text{C}_{16}\text{H}_{12}\text{FN}_2\text{O}_3$ : 299.0826, found: 299.0831.

**3ae**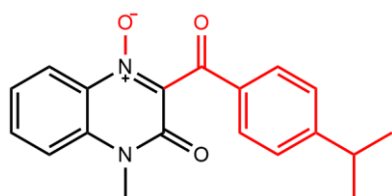

Yellow solid, isolated yield: 62 %; m.p: 124-125 °C;  $R_f$ =0.30 (Ethyl acetate: Petroleum ether, 1:4 (v/v)).  $^1\text{H}$  NMR (400 MHz,  $\text{CDCl}_3$ )  $\delta$  8.43 (d,  $J$  = 8.4 Hz, 1H), 7.85 (d,  $J$  = 8.2 Hz, 2H), 7.78 (t,  $J$  = 8.4 Hz, 1H), 7.49 (d,  $J$  = 8.4 Hz, 1H), 7.44 (t,  $J$  = 8.0 Hz, 1H), 7.33 (d,  $J$  = 8.2 Hz, 2H), 3.73 (s, 3H), 2.99 – 2.92 (m, 1H). 1.25 (d,  $J$  = 7.2 Hz, 6H).  $^{13}\text{C}$  NMR (100 MHz,  $\text{CDCl}_3$ )  $\delta$  186.19, 156.56, 155.18, 135.61, 133.85, 133.49, 132.66, 131.01, 129.46, 127.31, 124.15, 121.06, 114.80, 34.51, 29.10, 23.56. HRMS (ESI):  $m/z$ : calcd for  $[\text{M}+\text{H}]^+$   $\text{C}_{19}\text{H}_{19}\text{N}_2\text{O}_3$ : 323.1390, found: 323.1403.

**3af**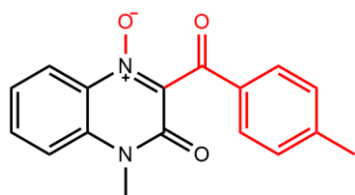

Yellow solid, isolated yield: 60 %; m.p: 120-121 °C;  $R_f$ = 0.30 (Ethyl acetate: Petroleum ether, 1:4 (v/v)).  $^1\text{H}$  NMR (400 MHz,  $\text{CDCl}_3$ )  $\delta$  8.44 (d,  $J$  = 8.3 Hz, 1H), 7.82 (d,  $J$  = 8.1 Hz, 2H), 7.77 (t,  $J$  = 7.3 Hz, 1H), 7.49 (d,  $J$  = 8.4 Hz, 1H), 7.44 (t,  $J$  = 7.7 Hz, 1H), 7.28 (d,  $J$  = 8.0 Hz, 2H), 3.74 (s, 3H), 2.41 (s, 3H).  $^{13}\text{C}$  NMR (100 MHz,  $\text{CDCl}_3$ )  $\delta$  186.24, 155.16, 145.93, 135.54, 133.84, 133.52, 132.40, 130.99, 129.83, 129.28, 124.14, 121.03, 114.82, 29.10, 21.93. HRMS (ESI):  $m/z$ : calcd for  $[\text{M}+\text{H}]^+$   $\text{C}_{17}\text{H}_{15}\text{N}_2\text{O}_3$ : 295.1077, found: 295.1080.

**3ag**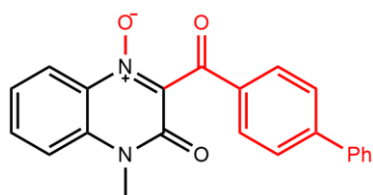

Yellow solid, isolated yield: 59 %; m.p: 129-130 °C;  $R_f$  = 0.35 (Ethyl acetate: Petroleum ether, 1:4 (v/v)).  $^1\text{H}$  NMR (400 MHz,  $\text{CDCl}_3$ )  $\delta$  8.43 (d,  $J$  = 8.4 Hz, 1H), 8.00 (d,  $J$  = 8.4 Hz, 2H), 7.78 (t,  $J$  = 7.9 Hz, 1H), 7.70 (d,  $J$  = 8.4 Hz, 2H), 7.60 (d,  $J$  = 7.2 Hz, 2H), 7.52 – 7.39 (m, 5H), 3.75 (s, 3H).  $^{13}\text{C}$  NMR (100 MHz,  $\text{CDCl}_3$ )  $\delta$  186.28, 155.18, 147.48, 139.77, 135.37, 133.88, 133.65, 133.50, 130.97, 129.76, 128.99, 128.46, 127.85, 127.36, 124.24, 121.00, 114.91, 29.16. HRMS (ESI):  $m/z$ : calcd for  $[\text{M}+\text{H}]^+$   $\text{C}_{22}\text{H}_{17}\text{N}_2\text{O}_3$ : 357.1234, found: 357.1245.

**3ah**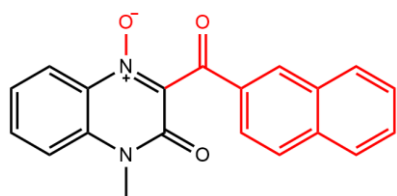

Yellow solid, isolated yield: 58 %; m.p: 121-122 °C;  $R_f$  = 0.25 (Ethyl acetate: Petroleum ether, 1:5 (v/v)).  $^1\text{H}$  NMR (400 MHz,  $\text{CDCl}_3$ )  $\delta$  8.46 (d,  $J$  = 8.3 Hz, 1H), 8.35 (s, 1H), 8.06 (d,  $J$  = 8.6 Hz, 1H), 7.94 (d,  $J$  = 8.6 Hz, 1H), 7.91 – 7.87 (m, 2H), 7.80 (t,  $J$  = 7.8 Hz, 1H), 7.61 (t,  $J$  = 7.5 Hz, 1H), 7.53 (d,  $J$  = 8.9 Hz, 2H), 7.47 (t,  $J$  = 8.0 Hz, 1H), 3.78 (s, 3H).  $^{13}\text{C}$  NMR (100 MHz,  $\text{CDCl}_3$ )  $\delta$  186.75, 155.26, 136.51, 135.49, 133.89, 133.64, 132.62, 132.27, 131.91, 131.02, 129.79, 129.19, 127.92, 126.90, 124.24, 123.68, 121.04, 121.03, 114.93, 29.19. HRMS (ESI):  $m/z$ : calcd for  $[\text{M}+\text{H}]^+$   $\text{C}_{20}\text{H}_{15}\text{N}_2\text{O}_3$ : 331.1077, found: 331.1079.

**3ai**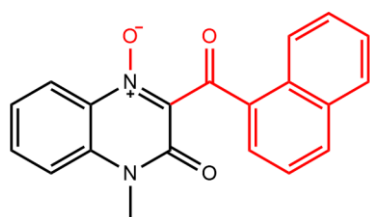

Yellow solid, isolated yield: 61 %; m.p: 122-123 °C;  $R_f$  = 0.25 (Ethyl acetate: Petroleum ether, 1:5 (v/v)).  $^1\text{H}$  NMR (400 MHz,  $\text{CDCl}_3$ )  $\delta$  9.27 (d,  $J$  = 8.7 Hz, 1H), 8.46 (d,  $J$  = 8.4, 1H), 8.11 (d,  $J$  = 8.2 Hz, 1H), 7.93 (t,  $J$  = 6.8 Hz, 2H), 7.83 – 7.73 (m, 2H), 7.63 (t,  $J$  = 7.1 Hz, 1H), 7.54 – 7.45 (m, 3H), 3.79 (s, 3H).  $^{13}\text{C}$  NMR (100 MHz,  $\text{CDCl}_3$ )  $\delta$  188.13, 155.30, 136.50, 135.55, 134.05, 133.76, 133.49, 132.12, 131.18, 130.95, 130.79, 129.22, 128.58, 126.97, 125.93, 124.61, 124.21, 120.95, 114.84, 29.13. HRMS (ESI):  $m/z$ : calcd for  $[\text{M}+\text{H}]^+$   $\text{C}_{20}\text{H}_{15}\text{N}_2\text{O}_3$ : 331.1077, found: 331.1086.

**3aj**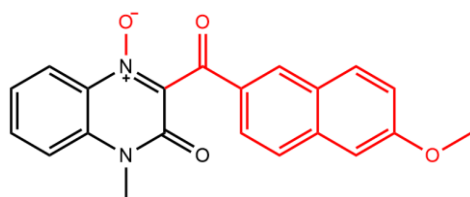

Yellow solid, isolated yield: 65 %; m.p: 126-127 °C;  $R_f$  = 0.30 (Ethyl acetate: Petroleum ether, 1:5 (v/v)).  $^1\text{H}$  NMR (400 MHz,  $\text{CDCl}_3$ )  $\delta$  8.46 (d,  $J$  = 8.4 Hz, 1H), 8.26 (s, 1H), 8.02 (d,  $J$  = 6.8 Hz, 1H), 7.82 – 7.75 (m, 3H), 7.52 (d,  $J$  = 8.2 Hz, 1H), 7.45 (t,  $J$  = 7.8 Hz, 1H), 7.17 – 7.14 (m, 2H), 3.94 (s, 3H), 3.76 (s, 3H).  $^{13}\text{C}$  NMR (100 MHz,  $\text{CDCl}_3$ )  $\delta$  186.37, 160.32, 155.26, 138.41, 135.67, 133.83, 133.55, 131.82, 131.39, 130.99, 130.31, 127.94, 124.18, 124.49, 124.18, 120.99, 119.81, 114.90, 105.96, 55.47, 29.15. HRMS (ESI):  $m/z$ : calcd for  $[\text{M}+\text{H}]^+$   $\text{C}_{21}\text{H}_{17}\text{N}_2\text{O}_4$ : 361.1183, found: 361.1194.

**3ak**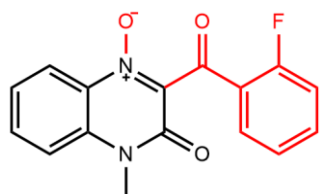

Yellow solid, isolated yield: 37 %; m.p: 113-114 °C;  $R_f$  = 0.20 (Ethyl acetate: Petroleum ether, 1:4 (v/v)).  $^1\text{H}$  NMR (400 MHz,  $\text{CDCl}_3$ )  $\delta$  8.19 – 8.15 (m, 1H), 7.75 – 7.69 (m, 1H), 7.37 – 7.26 (m, 6H), 3.73 (s, 3H).  $^{13}\text{C}$  NMR (100 MHz,  $\text{CDCl}_3$ )  $\delta$  162.31 (d,  $J$  = 261.2 Hz), 159.52 (d,  $J$  = 4.2 Hz), 154.96, 148.92, 136.93 (d,  $J$  = 9.3 Hz), 132.90, 126.42, 125.48, 125.17, 124.75 (d,  $J$  = 4.2 Hz), 124.70, 117.44 (d,  $J$  = 21.5 Hz), 114.98, 114.05 (d,  $J$  = 10.8 Hz), 112.20, 30.64. HRMS (ESI):  $m/z$ : calcd for  $[\text{M}+\text{H}]^+$   $\text{C}_{16}\text{H}_{12}\text{FN}_2\text{O}_3$ : 299.0826, found: 299.0811.

**3al**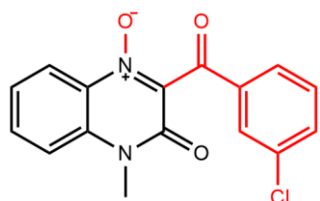

Yellow solid, isolated yield: 40 %; m.p: 125-126 °C;  $R_f$  = 0.30 (Ethyl acetate: Petroleum ether, 1:4 (v/v)).  $^1\text{H}$  NMR (400 MHz,  $\text{CDCl}_3$ )  $\delta$  8.43 (d,  $J$  = 8.4 Hz, 1H), 7.88 (s, 1H), 7.80 (t,  $J$  = 8.1 Hz, 2H), 7.60 (d,  $J$  = 9.0 Hz, 1H), 7.51 (d,  $J$  = 8.4 Hz, 1H), 7.48 – 7.42 (m, 2H), 3.75 (s, 3H).  $^{13}\text{C}$  NMR (100 MHz,  $\text{CDCl}_3$ )  $\delta$  185.59, 155.05, 136.33, 135.41, 134.66, 134.59, 133.94, 133.82, 130.98, 130.46, 128.98, 127.21, 124.35, 121.06, 114.92, 29.70. HRMS (ESI):  $m/z$ : calcd for  $[\text{M}+\text{H}]^+$   $\text{C}_{16}\text{H}_{12}\text{ClN}_2\text{O}_3$ : 315.0531, found: 315.0533.



### 3ba

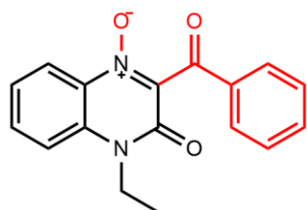

Yellow solid, isolated yield: 58 %; m.p: 122-123 °C;  $R_f$ = 0.30 (Ethyl acetate: Petroleum ether, 1:4 (v/v)).  $^1\text{H}$  NMR (400 MHz,  $\text{CDCl}_3$ )  $\delta$  8.45 (d,  $J$  = 8.4 Hz, 1H), 7.93 (d,  $J$  = 8.0 Hz, 2H), 7.77 (t,  $J$  = 7.9 Hz, 1H), 7.63 (t,  $J$  = 7.2 Hz, 1H), 7.47 – 7.52 (m, 3H), 7.43 (t,  $J$  = 7.8 Hz, 1H), 4.37 (q,  $J$  = 7.1 Hz, 2H), 1.43 (t,  $J$  = 7.1 Hz, 3H).  $^{13}\text{C}$  NMR (100 MHz,  $\text{CDCl}_3$ )  $\delta$  186.86, 154.73, 135.25, 134.79, 134.78, 134.70, 133.59, 132.98, 131.13, 129.12, 124.03, 121.21, 114.71, 37.52, 12.72. HRMS (ESI):  $m/z$ : calcd for  $[\text{M}+\text{H}]^+$   $\text{C}_{17}\text{H}_{14}\text{N}_2\text{O}_3$ : 295.1077, found: 295.1082.

### 3ca

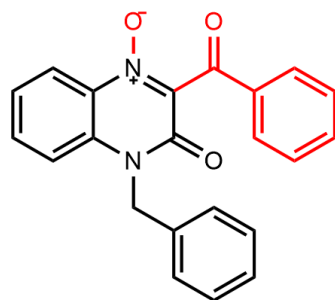

Yellow solid, isolated yield: 57 %; m.p: 108-109 °C;  $R_f$ = 0.30 (Ethyl acetate: Petroleum ether, 1:5 (v/v)).  $^1\text{H}$  NMR (400 MHz,  $\text{CDCl}_3$ )  $\delta$  8.42 (d,  $J$  = 8.4 Hz, 1H), 7.97 (d,  $J$  = 7.1 Hz, 2H), 7.67 – 7.62 (m, 2H), 7.52 (t,  $J$  = 7.7 Hz, 2H), 7.45 (d,  $J$  = 8.1 Hz, 1H), 7.41 – 7.36 (m, 2H), 7.35 – 7.30 (m, 4H), 5.52 (s, 2H).  $^{13}\text{C}$  NMR (100 MHz,  $\text{CDCl}_3$ )  $\delta$  186.67, 155.42, 135.26, 134.79, 134.76, 133.49, 133.29, 131.22, 130.64, 129.16, 129.15, 128.09, 126.97, 126.82, 124.26, 121.07, 115.65, 45.83. HRMS (ESI):  $m/z$ : calcd for  $[\text{M}+\text{H}]^+$   $\text{C}_{22}\text{H}_{17}\text{N}_2\text{O}_3$ : 357.1234, found: 357.1243.

### 3da

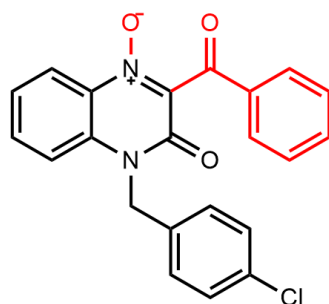

Yellow solid, isolated yield: 54 %; m.p: 113-114 °C;  $R_f$ = 0.30 (Ethyl acetate: Petroleum ether, 1:5 (v/v)).  $^1\text{H}$  NMR (400 MHz,  $\text{CDCl}_3$ )  $\delta$  8.43 (d,  $J$  = 8.3 Hz, 1H), 7.95 (d,  $J$  = 7.2 Hz, 2H), 7.65 (t,  $J$  = 7.9 Hz, 2H), 7.51 (t,  $J$  = 7.6 Hz, 2H), 7.43 – 7.38

(m, 2H), 7.33 (d,  $J = 8.5$  Hz, 2H), 7.28 (d,  $J = 8.0$  Hz, 2H), 5.48 (s, 2H).  $^{13}\text{C}$  NMR (100 MHz,  $\text{CDCl}_3$ )  $\delta$  186.57, 155.35, 135.20, 134.81, 134.74, 134.04, 133.57, 133.29, 133.08, 131.25, 129.34, 129.18, 129.15, 128.47, 124.41, 121.21, 115.38, 45.22. HRMS (ESI):  $m/z$ : calcd for  $[\text{M}+\text{H}]^+$   $\text{C}_{22}\text{H}_{16}\text{ClN}_2\text{O}_3$ : 391.0844, found: 391.0843.

### 3ea

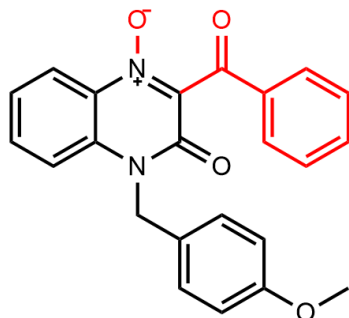

Yellow solid, isolated yield: 59 %; m.p: 112-113 °C;  $R_f = 0.30$  (Ethyl acetate: Petroleum ether, 1:5 (v/v)).  $^1\text{H}$  NMR (400 MHz,  $\text{CDCl}_3$ )  $\delta$  8.42 (d,  $J = 8.4$  Hz, 1H), 7.95 (d,  $J = 8.4$  Hz, 2H), 7.67 – 7.62 (m, 2H), 7.53 – 7.48 (m, 3H), 7.38 (t,  $J = 7.8$  Hz, 1H), 7.28 (d,  $J = 8.7$  Hz, 2H), 6.88 (d,  $J = 8.7$  Hz, 2H), 5.45 (s, 2H), 3.78 (s, 3H).  $^{13}\text{C}$  NMR (100 MHz,  $\text{CDCl}_3$ )  $\delta$  186.76, 159.36, 155.41, 135.24, 134.80, 134.75, 133.47, 133.28, 131.17, 130.28, 129.16, 128.56, 126.81, 124.20, 120.99, 115.67, 114.49, 55.32, 45.32. HRMS (ESI):  $m/z$ : calcd for  $[\text{M}+\text{H}]^+$   $\text{C}_{23}\text{H}_{19}\text{N}_2\text{O}_4$ : 387.1339, found: 387.1349.

### 3fa

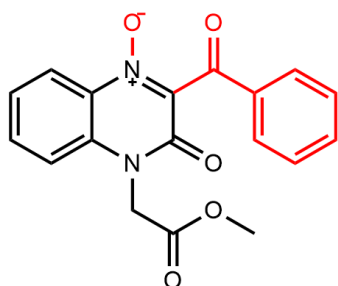

Yellow solid, isolated yield: 52 %; m.p: 109-110 °C;  $R_f = 0.35$  (Ethyl acetate: Petroleum ether, 1:5 (v/v)).  $^1\text{H}$  NMR (400 MHz,  $\text{CDCl}_3$ )  $\delta$  8.47 (d,  $J = 8.4$  Hz, 1H), 7.96 (d,  $J = 7.7$  Hz, 2H), 7.77 (t,  $J = 7.8$  Hz, 1H), 7.66 (t,  $J = 7.4$  Hz, 1H), 7.54 – 7.46 (m, 4H), 5.11 (s, 2H), 3.84 (s, 3H).  $^{13}\text{C}$  NMR (100 MHz,  $\text{CDCl}_3$ )  $\delta$  186.39, 167.26, 154.92, 134.98, 134.83, 134.64, 133.78, 133.02, 131.15, 129.16, 124.57, 121.22, 114.44, 53.10, 43.01. HRMS (ESI):  $m/z$ : calcd for  $[\text{M}+\text{H}]^+$   $\text{C}_{18}\text{H}_{15}\text{N}_2\text{O}_5$ : 339.0975, found: 339.0972.

**3ga**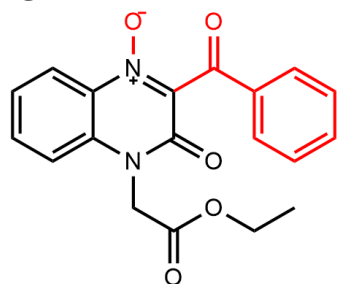

Yellow solid, isolated yield: 50 %; m.p: 115-116 °C;  $R_f$ = 0.35 (Ethyl acetate: Petroleum ether, 1:5 (v/v)).  $^1\text{H}$  NMR (400 MHz,  $\text{CDCl}_3$ )  $\delta$  8.41 (d,  $J$  = 8.4 Hz, 1H), 7.91 (d,  $J$  = 7.8 Hz, 2H), 7.72 (t,  $J$  = 7.9 Hz, 1H), 7.62 (t,  $J$  = 7.4 Hz, 1H), 7.50 – 7.40 (m, 4H), 5.05 (s, 2H), 4.26 (q,  $J$  = 7.1 Hz, 2H), 1.28 (t,  $J$  = 7.2 Hz, 3H).  $^{13}\text{C}$  NMR (100 MHz,  $\text{CDCl}_3$ )  $\delta$  186.40, 166.74, 154.92, 134.98, 134.81, 134.65, 133.73, 133.06, 131.11, 129.15, 124.51, 121.18, 114.47, 62.39, 43.14, 14.12. HRMS (ESI): m/z: calcd for  $[\text{M}+\text{H}]^+$   $\text{C}_{19}\text{H}_{17}\text{N}_2\text{O}_5$ : 353.1132, found: 353.1140.

**3ha**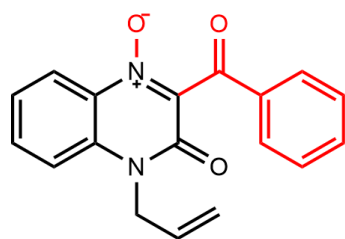

Yellow solid, isolated yield: 47 %; m.p: 103-104 °C;  $R_f$ = 0.35 (Ethyl acetate: Petroleum ether, 1:6 (v/v)).  $^1\text{H}$  NMR (400 MHz,  $\text{CDCl}_3$ )  $\delta$  8.44 (d,  $J$  = 8.4 Hz, 1H), 7.93 (d,  $J$  = 7.4 Hz, 2H), 7.74 (t,  $J$  = 8.8 Hz, 1H), 7.63 (t,  $J$  = 7.2 Hz, 1H), 7.49 (t,  $J$  = 7.7 Hz, 3H), 7.43 (t,  $J$  = 7.8 Hz, 1H), 5.99 – 5.91 (m, 1H), 5.36 – 5.28 (m, 2H), 4.94 (d,  $J$  = 5.2 Hz, 2H).  $^{13}\text{C}$  NMR (100 MHz,  $\text{CDCl}_3$ )  $\delta$  186.71, 154.81, 135.20, 134.74, 133.50, 133.18, 131.05, 130.61, 130.37, 129.13, 124.22, 120.98, 118.81, 115.51, 44.47. HRMS (ESI): m/z: calcd for  $[\text{M}+\text{H}]^+$   $\text{C}_{18}\text{H}_{15}\text{N}_2\text{O}_3$ : 307.1077, found: 307.1083.

**3ia**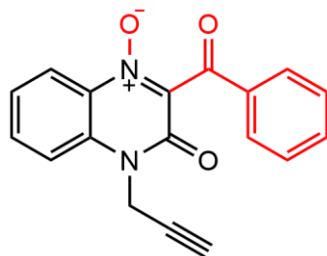

Yellow solid, isolated yield: 48 %; m.p: 107-108 °C;  $R_f$ = 0.35 (Ethyl acetate: Petroleum ether, 1:6 (v/v)).  $^1\text{H}$  NMR (400 MHz,  $\text{CDCl}_3$ )  $\delta$  8.44 (d,  $J$  = 7.9 Hz, 1H), 7.93 (d,  $J$  = 7.5 Hz, 2H), 7.81 (t,  $J$  = 7.3 Hz, 1H), 7.69 – 7.62 (m, 2H), 7.52 – 7.46 (t, m, 3H), 5.09 (d,  $J$  = 2.4 Hz, 2H), 2.36 (t,  $J$  = 2.4 Hz, 1H).  $^{13}\text{C}$  NMR (100 MHz,  $\text{CDCl}_3$ )  $\delta$  186.47, 154.28, 134.82, 134.65, 133.64, 132.37, 131.26, 130.07, 129.19,

129.14, 124.60, 121.11, 115.46, 76.26, 74.05, 31.47. HRMS (ESI): m/z: calcd for  $[M+H]^+$   $C_{18}H_{13}N_2O_3$ : 305.0921, found: 305.0907.

### 3ja

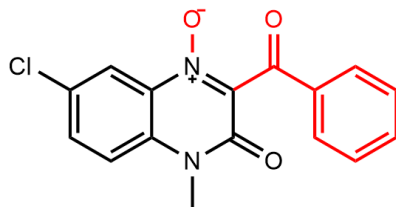

Yellow solid, isolated yield: 53 %; m.p: 124-125 °C;  $R_f$ = 0.30 (Ethyl acetate: Petroleum ether, 1:3 (v/v)).  $^1H$  NMR (400 MHz,  $CDCl_3$ )  $\delta$  8.42 (d,  $J$  = 2.2 Hz, 1H), 7.91 (d,  $J$  = 7.5 Hz, 2H), 7.72 (dd,  $J$  = 8.9, 2.3 Hz, 1H), 7.64 (t,  $J$  = 7.4 Hz, 1H), 7.49 (t,  $J$  = 7.7 Hz, 2H), 7.44 (d,  $J$  = 9.0 Hz, 1H), 3.72 (s, 3H).  $^{13}C$  NMR (100 MHz,  $CDCl_3$ )  $\delta$  186.30, 154.81, 135.84, 134.89, 134.53, 133.76, 132.50, 131.35, 130.32, 129.16, 129.14, 120.71, 116.33, 29.28. HRMS (ESI): m/z: calcd for  $[M+H]^+$   $C_{16}H_{12}ClN_2O_3$ : 315.0531, found: 315.0543.

### 3ka

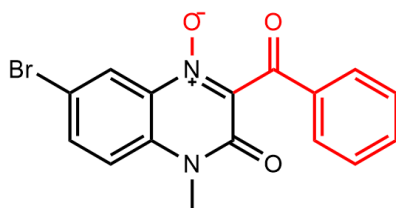

Yellow solid, isolated yield: 52 %; m.p: 126-127 °C;  $R_f$ = 0.30 (Ethyl acetate: Petroleum ether, 1:3 (v/v)).  $^1H$  NMR (400 MHz,  $CDCl_3$ )  $\delta$  8.56 (d,  $J$  = 2.2 Hz, 1H), 7.91 (d,  $J$  = 7.3 Hz, 2H), 7.86 (d,  $J$  = 8.9 Hz, 1H), 7.64 (t,  $J$  = 7.4 Hz, 1H), 7.49 (t,  $J$  = 7.8 Hz, 2H), 7.37 (d,  $J$  = 8.9 Hz, 1H), 3.72 (s, 3H).  $^{13}C$  NMR (100 MHz,  $CDCl_3$ )  $\delta$  186.26, 154.81, 136.55, 135.79, 134.91, 134.50, 132.92, 131.53, 129.16, 123.77, 117.34, 116.45, 29.27. HRMS (ESI): m/z: calcd for  $[M+H]^+$   $C_{16}H_{12}BrN_2O_3$ : 359.0026, found: 359.0034.

### 3la

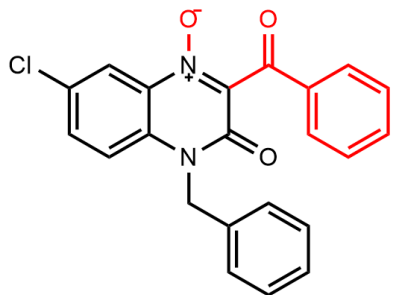

Yellow solid, isolated yield: 55 %; m.p: 132-133 °C;  $R_f$ = 0.30 (Ethyl acetate: Petroleum ether, 1:3 (v/v)).  $^1H$  NMR (400 MHz,  $CDCl_3$ )  $\delta$  8.40 (d,  $J$  = 2.4 Hz, 1H),

7.94 (d,  $J = 7.3$  Hz, 2H), 7.65 (t,  $J = 7.4$  Hz, 1H), 7.57 (dd,  $J = 9.0, 2.4$  Hz, 1H), 7.52 (t,  $J = 8.0$  Hz, 2H), 7.37 (d,  $J = 8.9$  Hz, 3H), 7.33 – 7.28 (m, 3H), 5.49 (s, 2H).  $^{13}\text{C}$  NMR (100 MHz,  $\text{CDCl}_3$ )  $\delta$  186.27, 155.12, 135.76, 134.96, 134.56, 134.36, 133.68, 131.87, 131.64, 130.44, 129.26, 129.22, 129.18, 128.28, 126.89, 120.84, 117.05, 45.98. HRMS (ESI):  $m/z$ : calcd for  $[\text{M}+\text{H}]^+$   $\text{C}_{22}\text{H}_{16}\text{ClN}_2\text{O}_3$ : 391.0844, found: 391.0845.

## 12

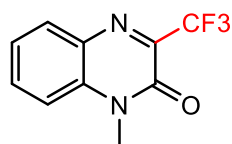

This product was obtained using  $\text{CF}_3\text{SO}_2\text{Na}$  as substrate under standard conditions.

Yellow solid, isolated yield: 90 %,  $R_f = 0.30$  (Ethyl acetate: Petroleum ether, 1:6 (v/v)).  $^1\text{H}$  NMR (400 MHz,  $\text{CDCl}_3$ )  $\delta$  8.00 (d,  $J = 8.1$  Hz, 1H), 7.74 (t,  $J = 7.9$  Hz, 1H), 7.45 (t,  $J = 7.7$  Hz, 1H), 7.40 (d,  $J = 8.5$  Hz, 1H), 3.76 (s, 3H).  $^{13}\text{C}$  NMR (100 MHz,  $\text{CDCl}_3$ )  $\delta$  151.61, 143.87 (q,  $J = 33.9$  Hz), 134.59, 133.56, 131.75, 130.90, 124.52, 119.91 (q,  $J = 274.5$  Hz), 114.03, 29.17. HRMS (ESI):  $m/z$ : calcd for  $[\text{M}+\text{H}]^+$   $\text{C}_{10}\text{H}_8\text{F}_3\text{N}_2\text{O}$ : 229.0583, Found: 229.0593.

## 19<sup>[1]</sup>

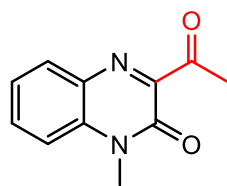

This product was obtained using acetaldehyde as substrate under standard conditions.

Yellow solid, isolated yield: 65 %,  $R_f = 0.20$  (Ethyl acetate: Petroleum ether, 1:6 (v/v)).  $^1\text{H}$  NMR (400 MHz,  $\text{CDCl}_3$ )  $\delta$  7.96 (d,  $J = 8.0$  Hz, 1H), 7.68 (t,  $J = 7.9$  Hz, 1H), 7.41 (t,  $J = 7.7$  Hz, 1H), 7.36 (d,  $J = 8.5$  Hz, 1H), 3.73 (s, 3H), 2.72 (s, 3H).

[1] K. Zhang, J. Xu, J. Xiao, R. Zhong, J. Li, *Eur. J. Org. Chem.*, 2023, **26**, e202201432

# 8. <sup>1</sup>H and <sup>13</sup>C NMR spectra

3aa

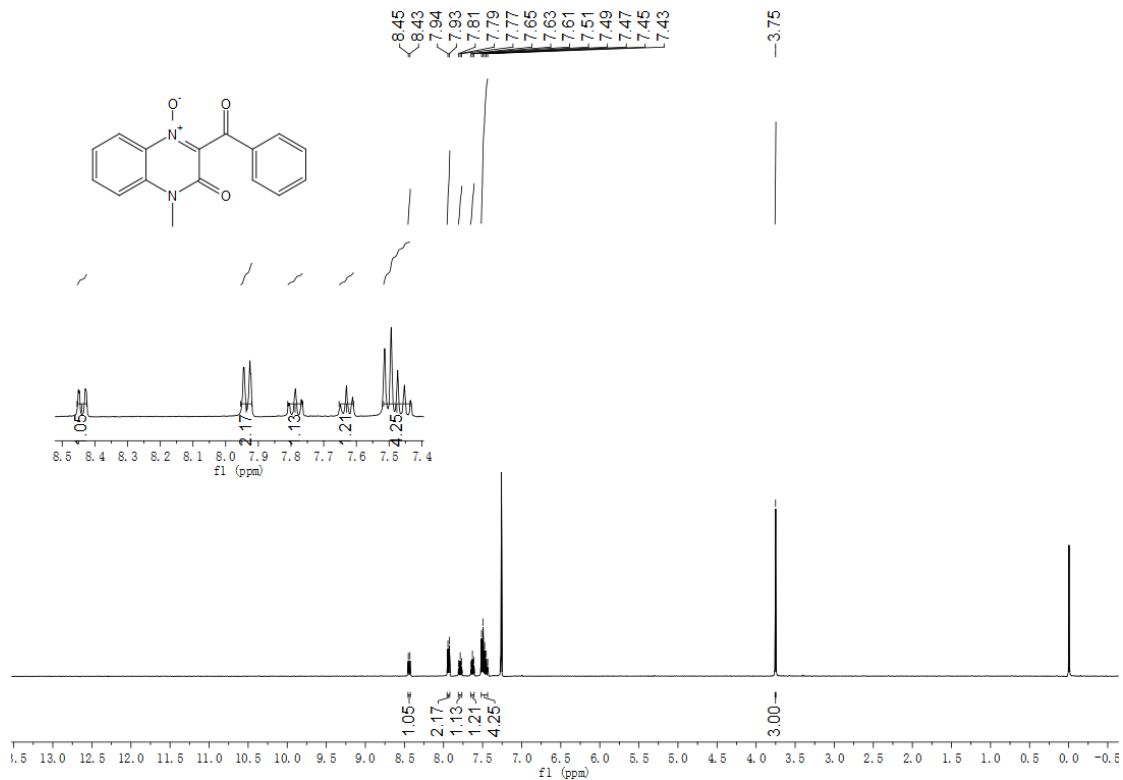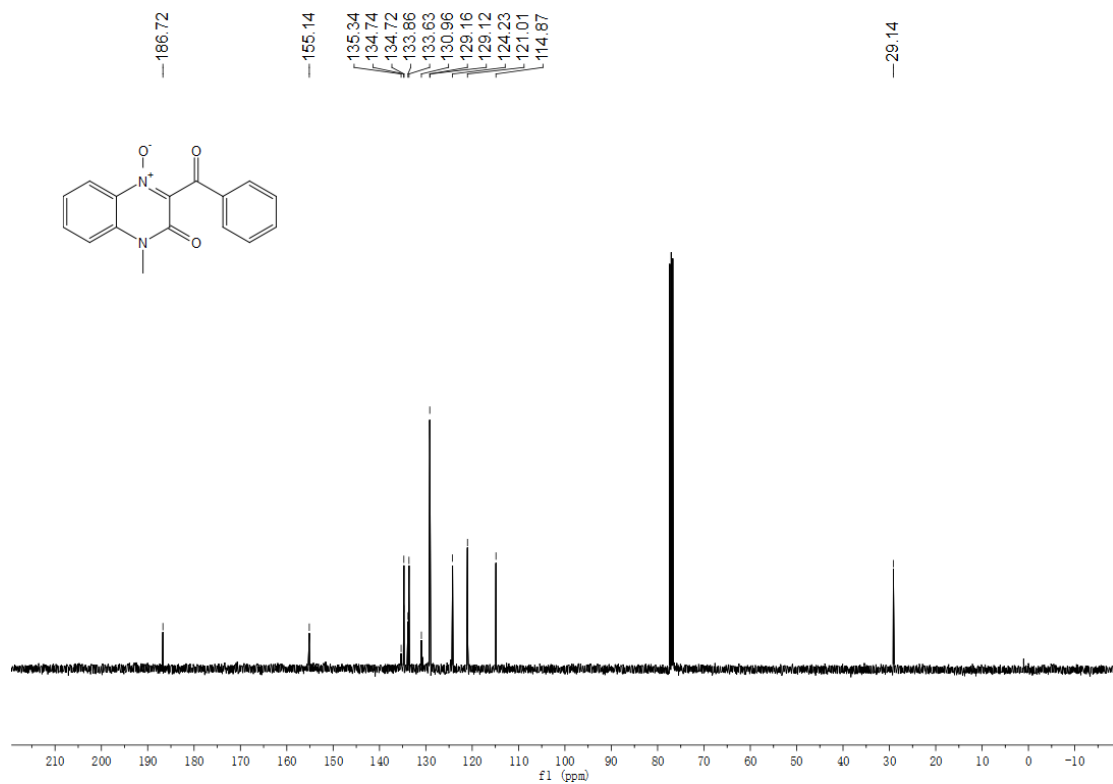

**3ab**

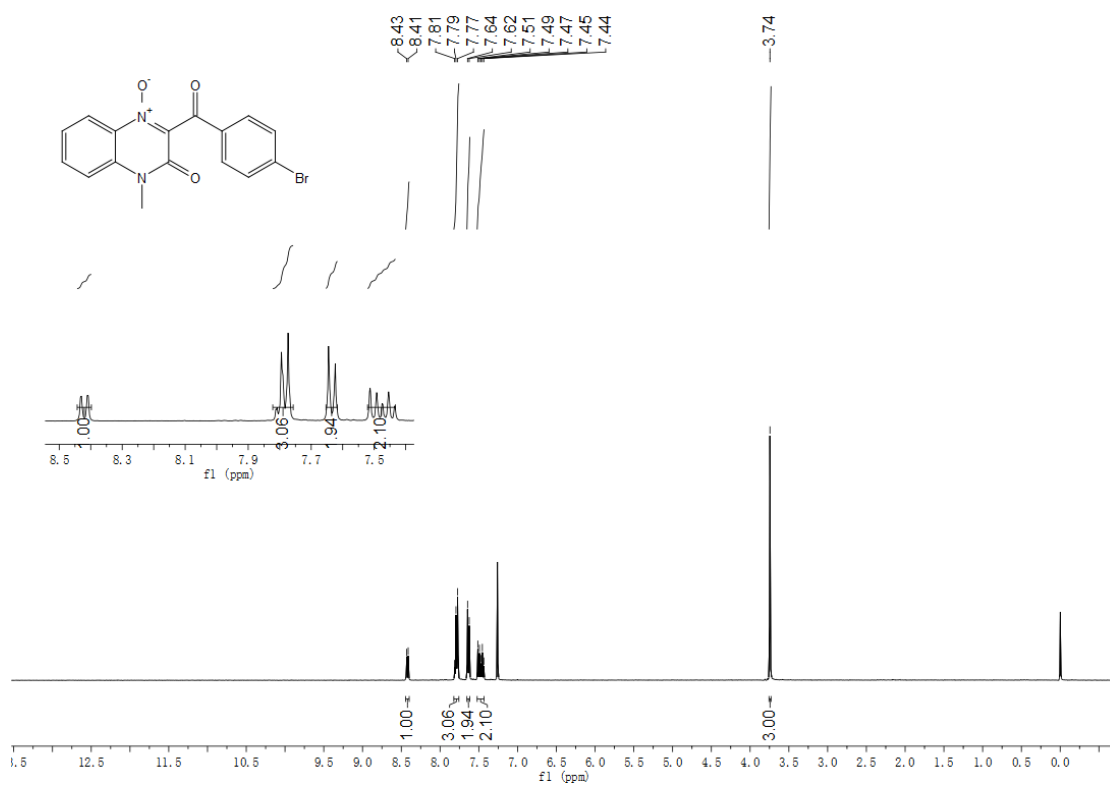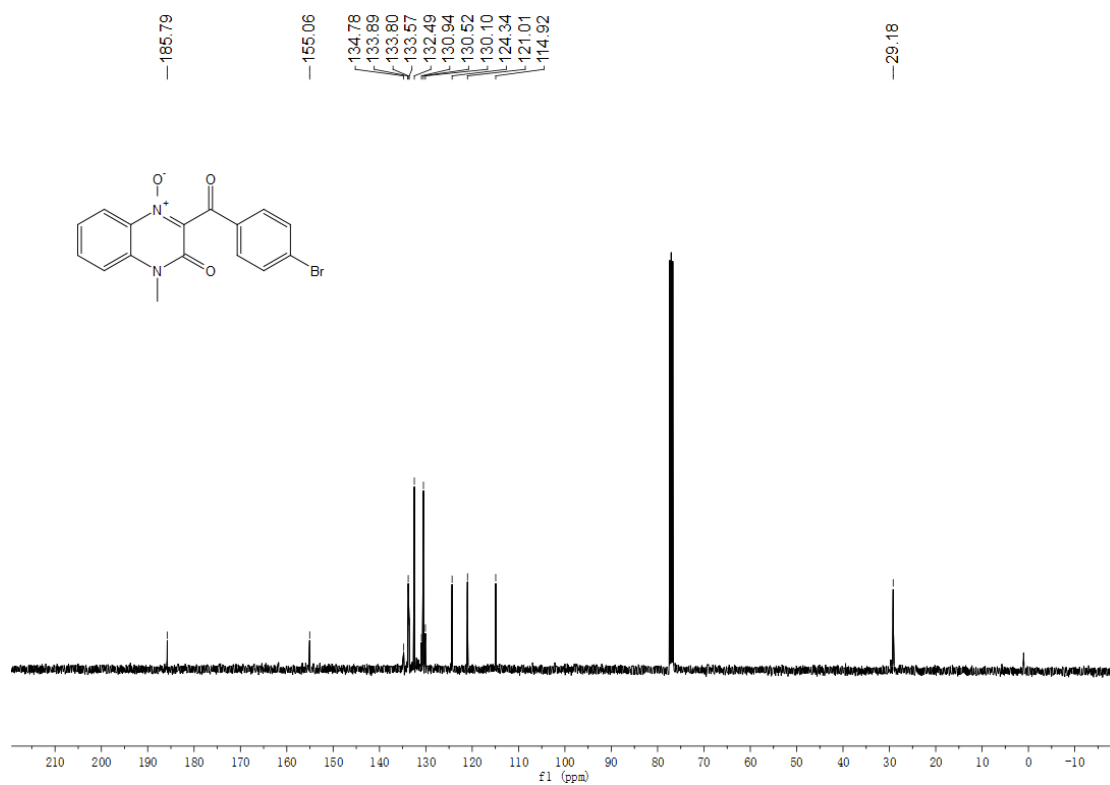

**3ac**

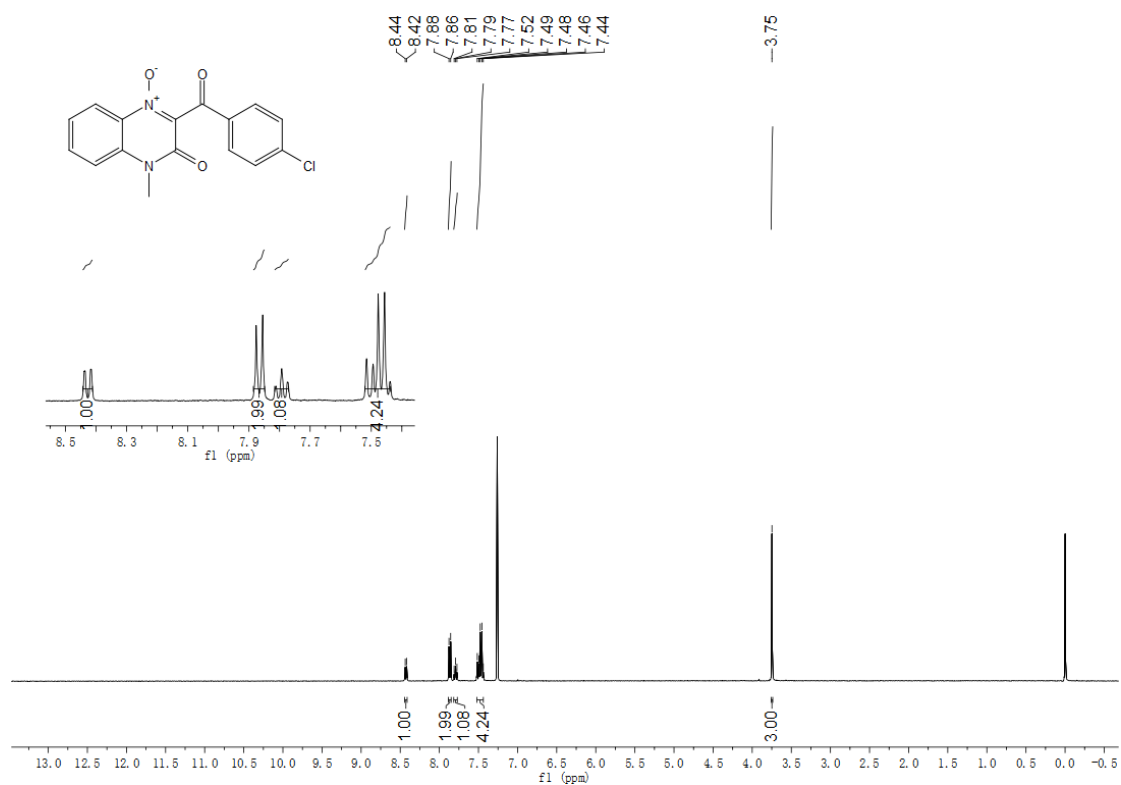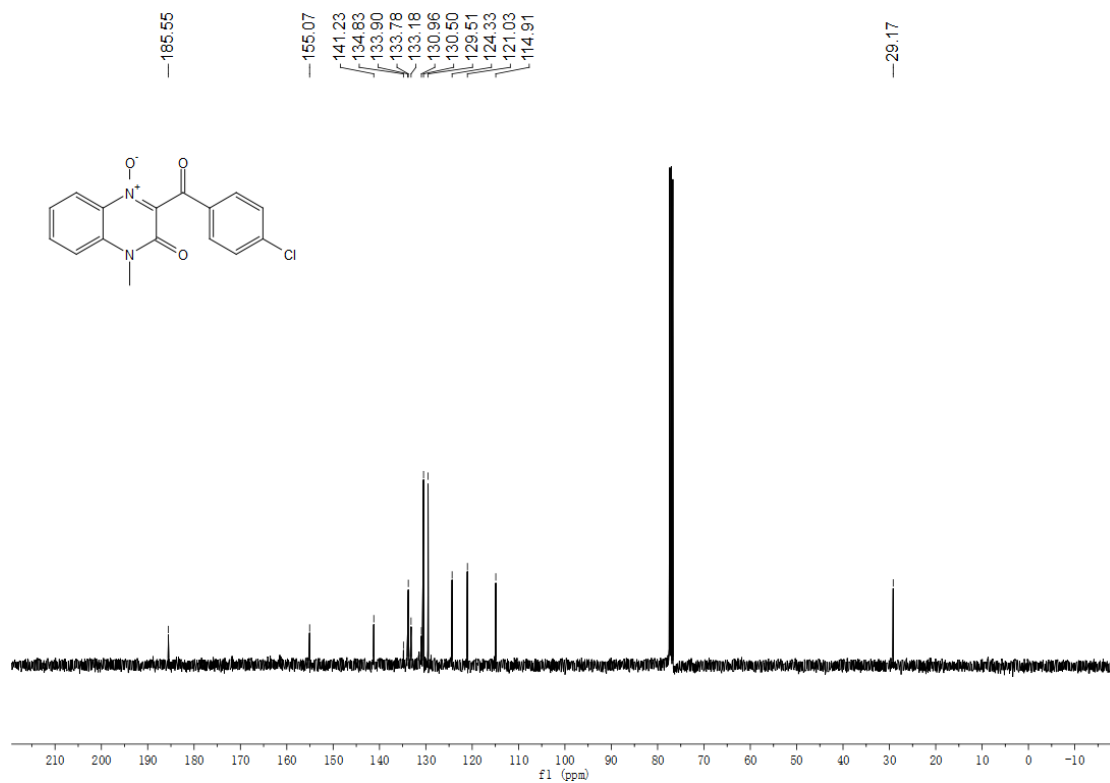



**3ad**

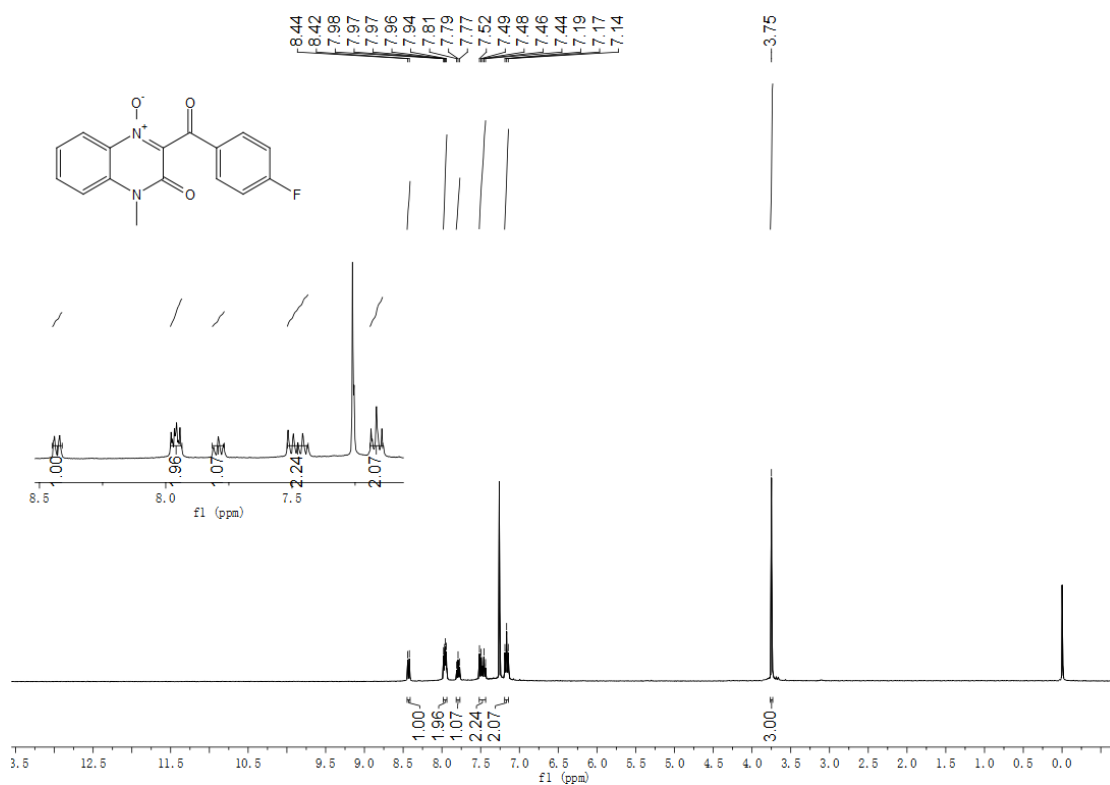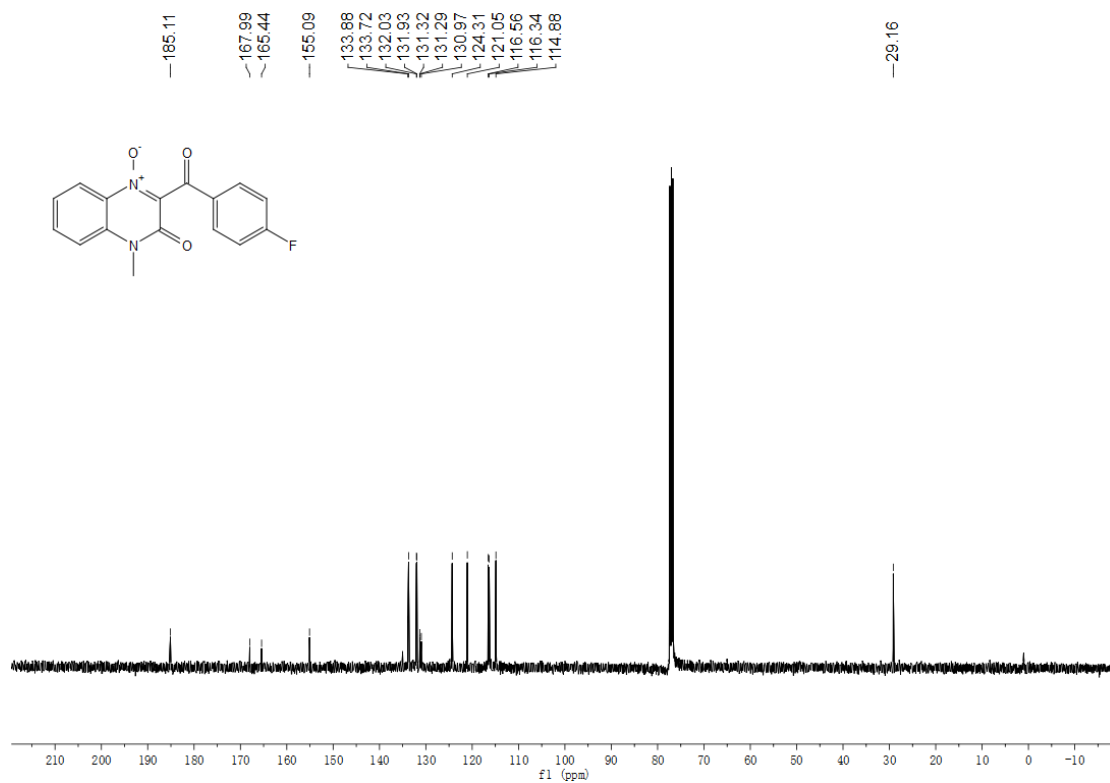

**3ae**

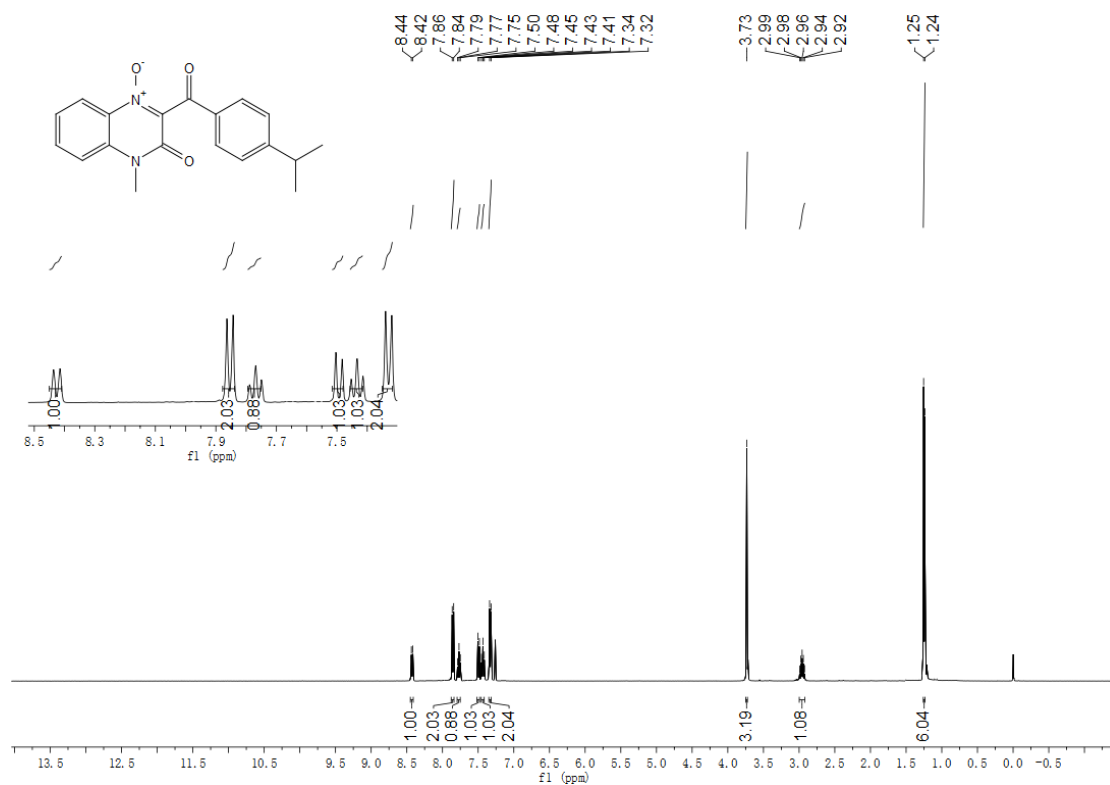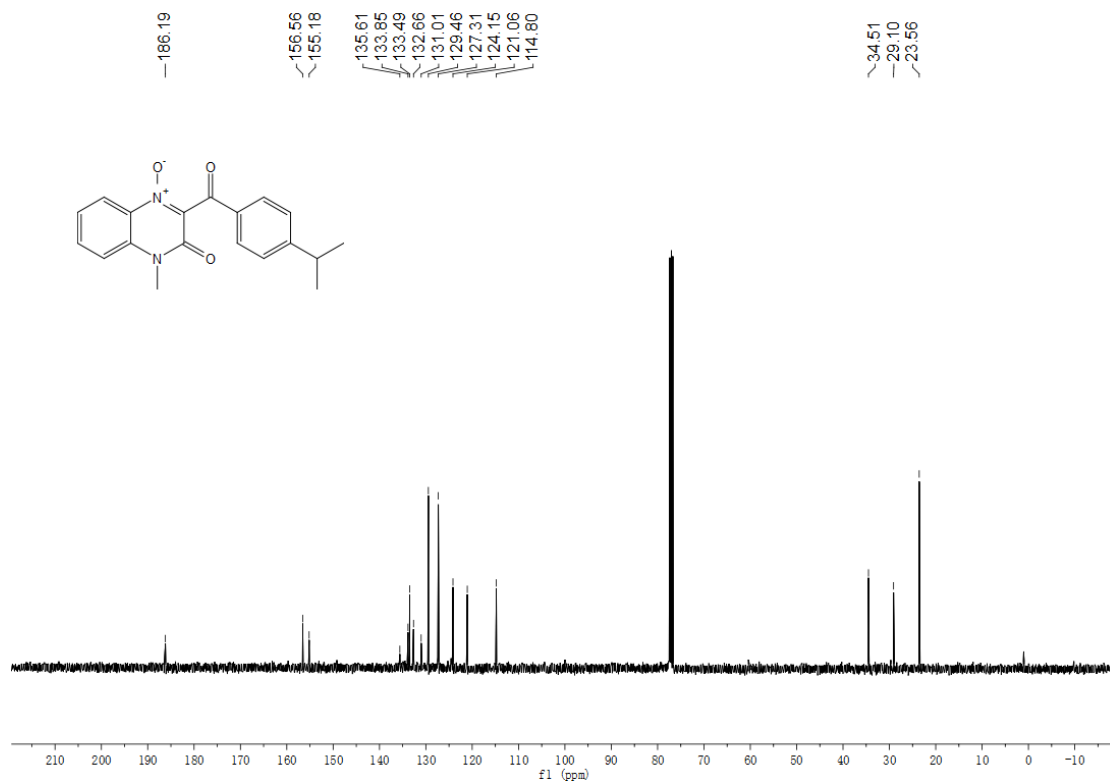

**3af**

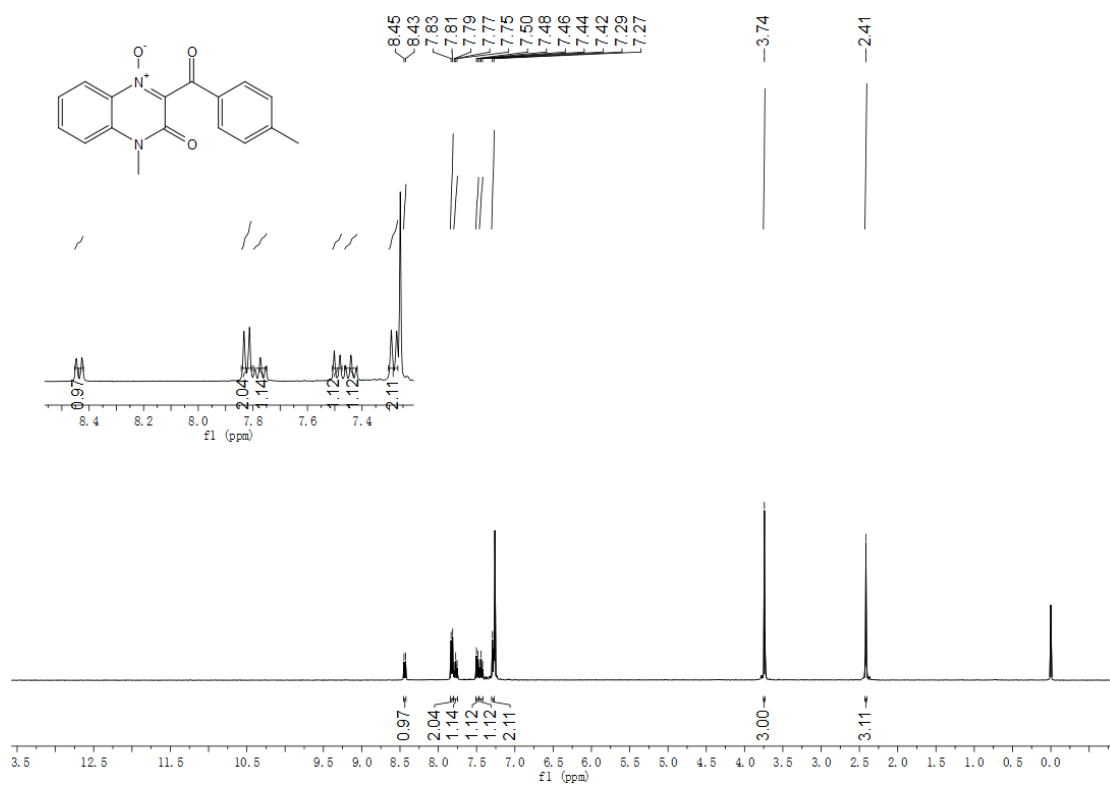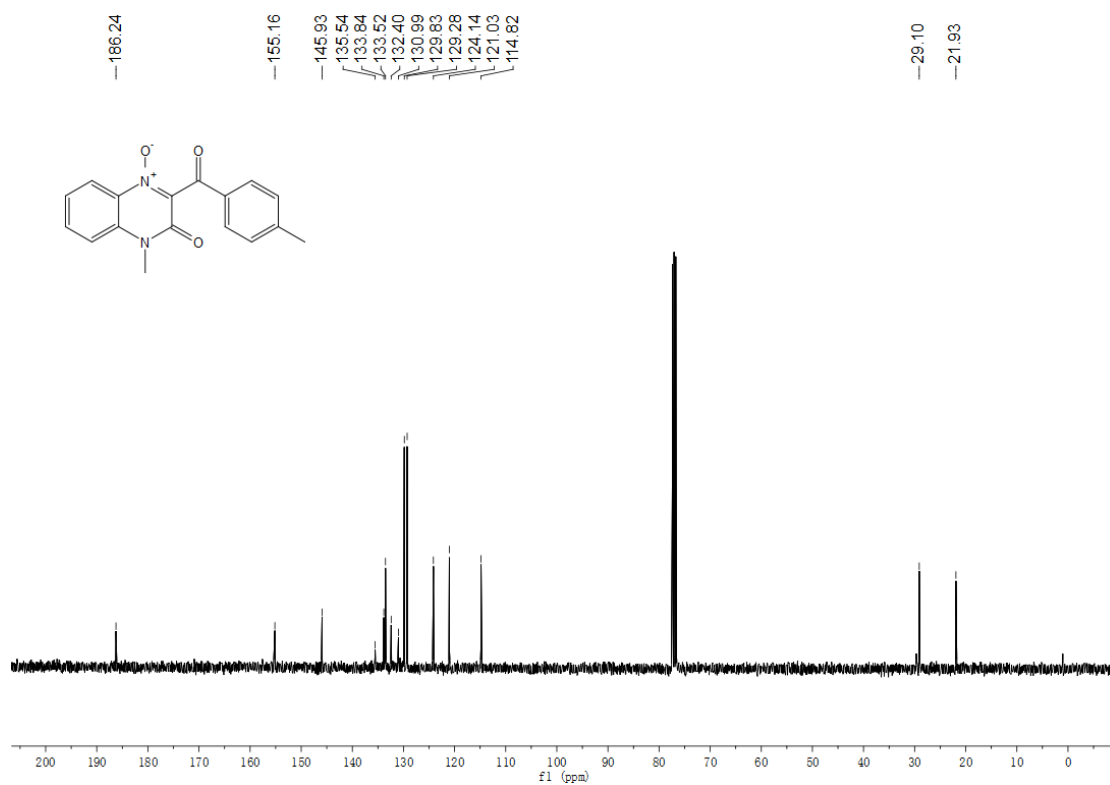

3ag

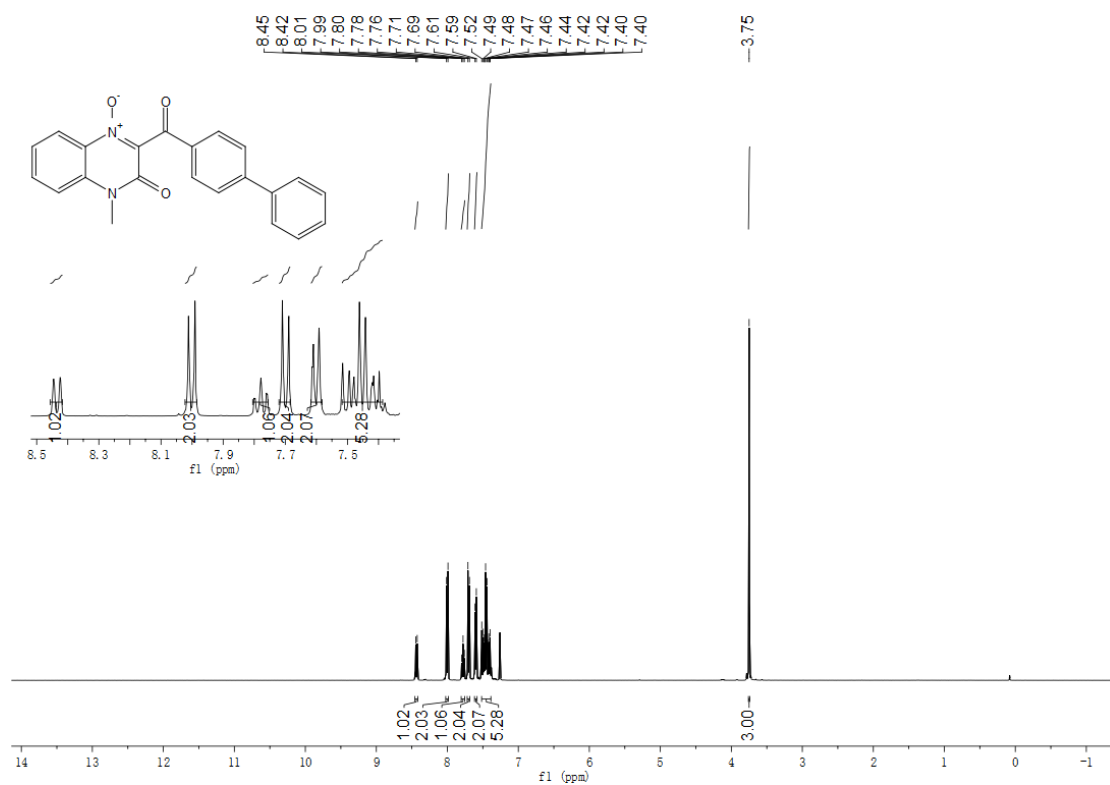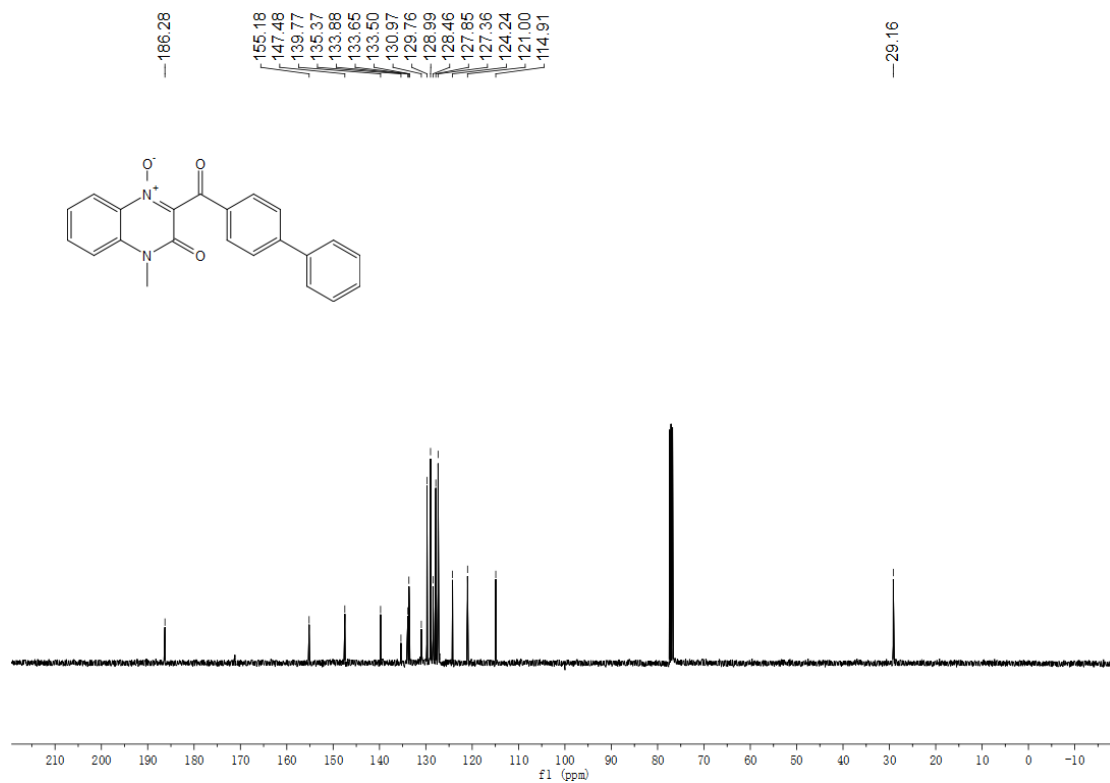

### 3ah

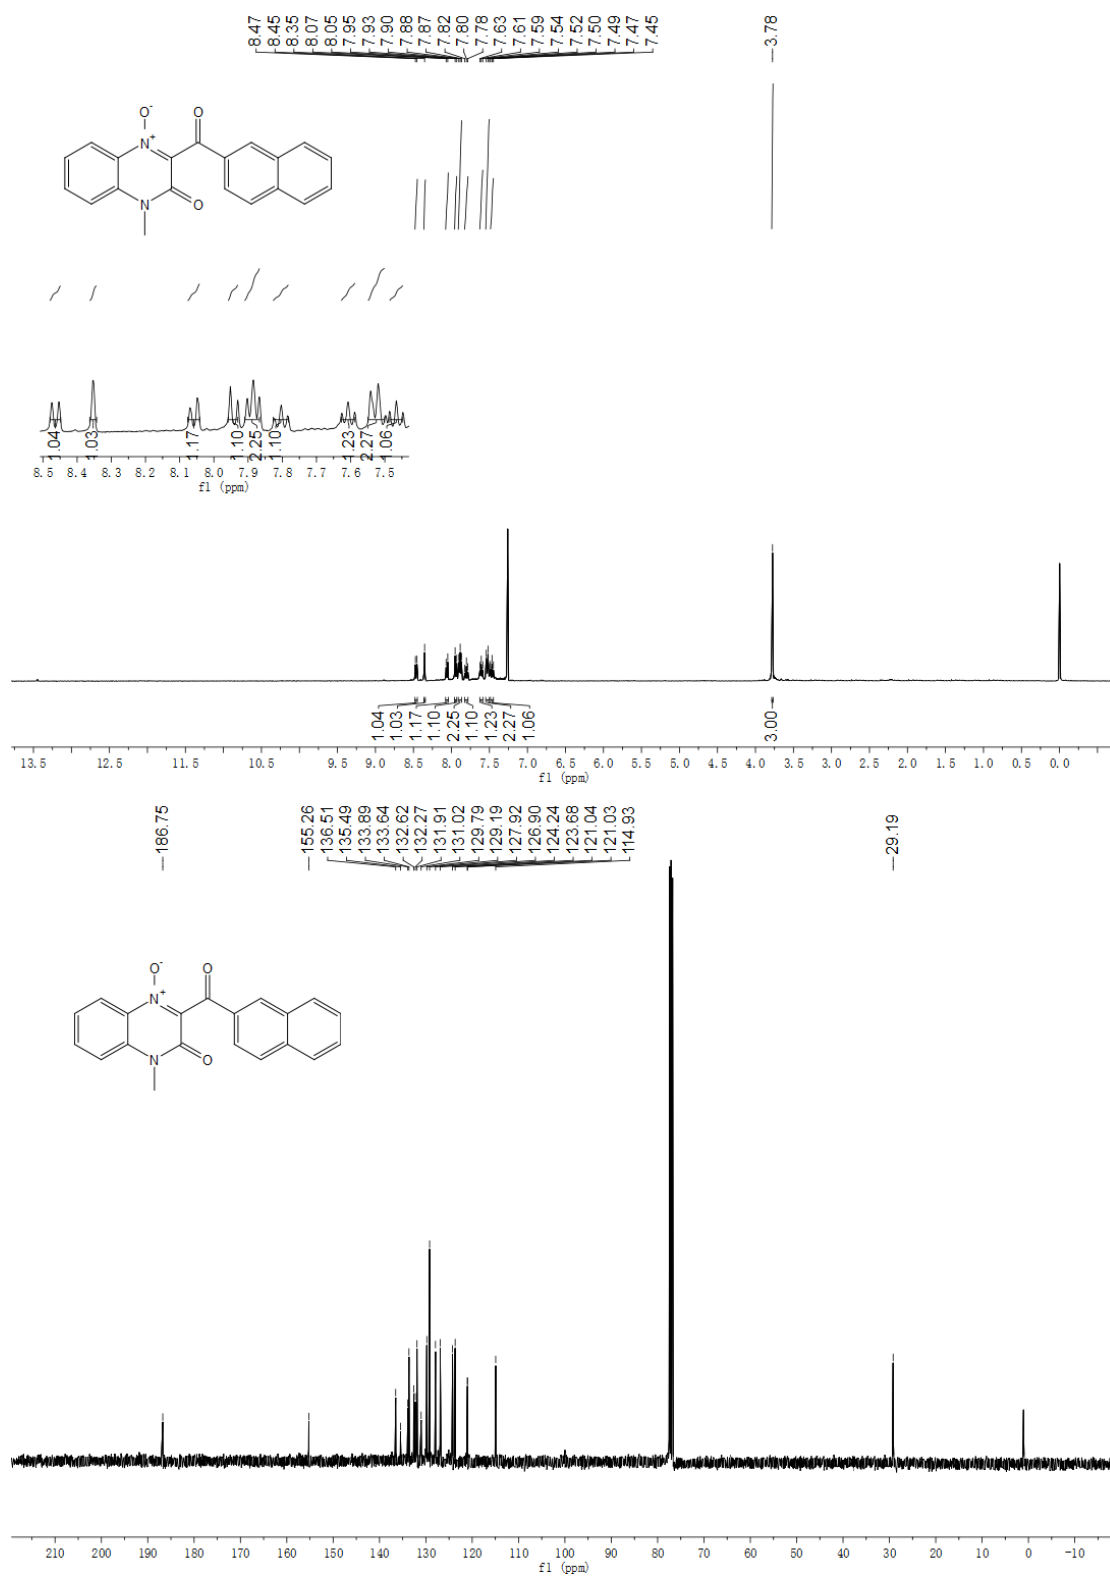

3ai

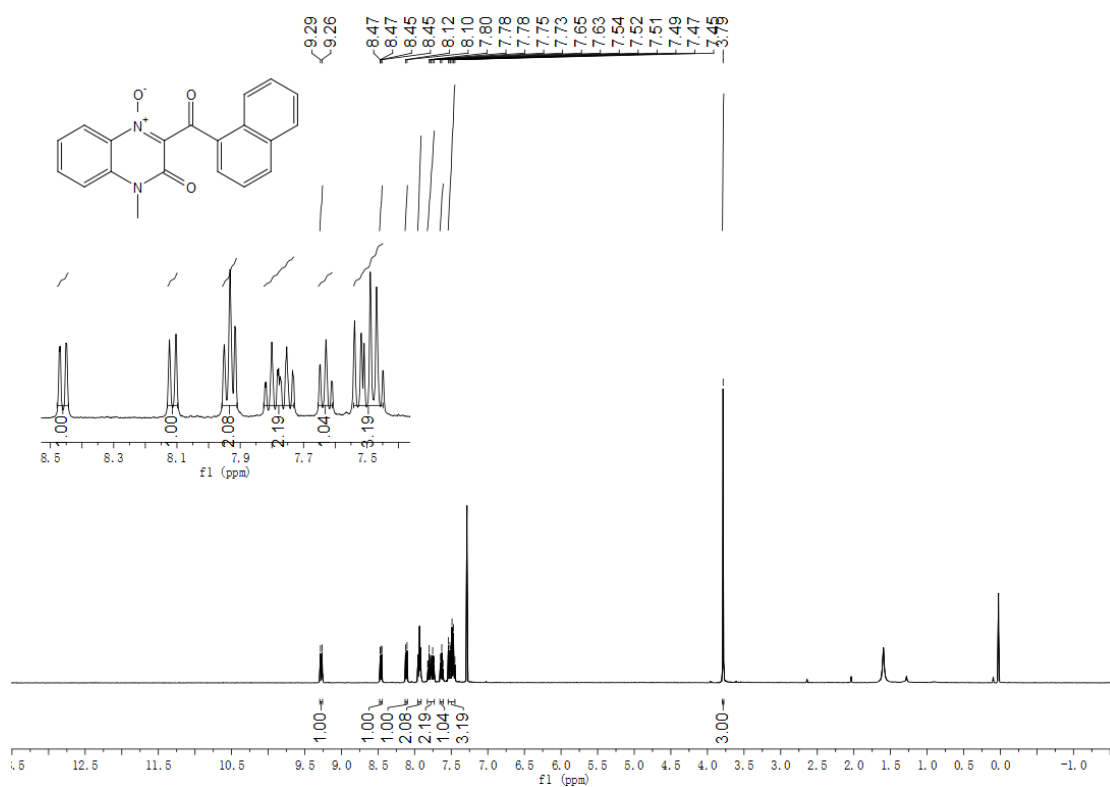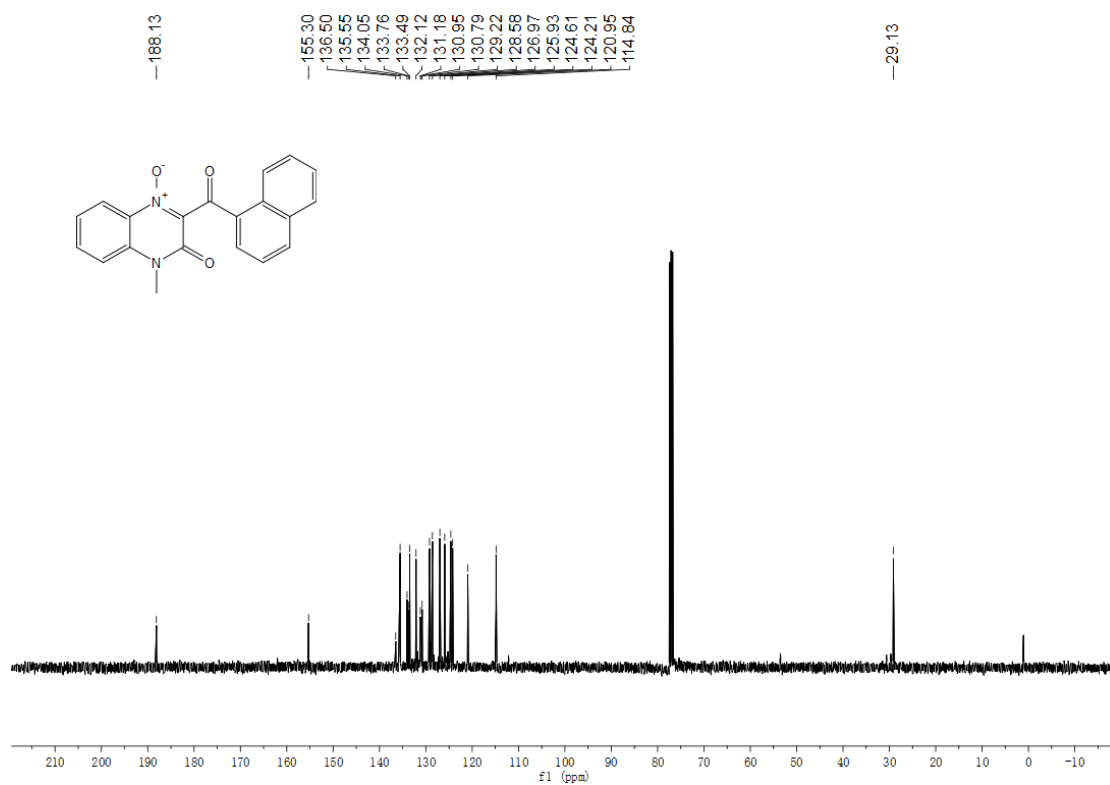

3aj

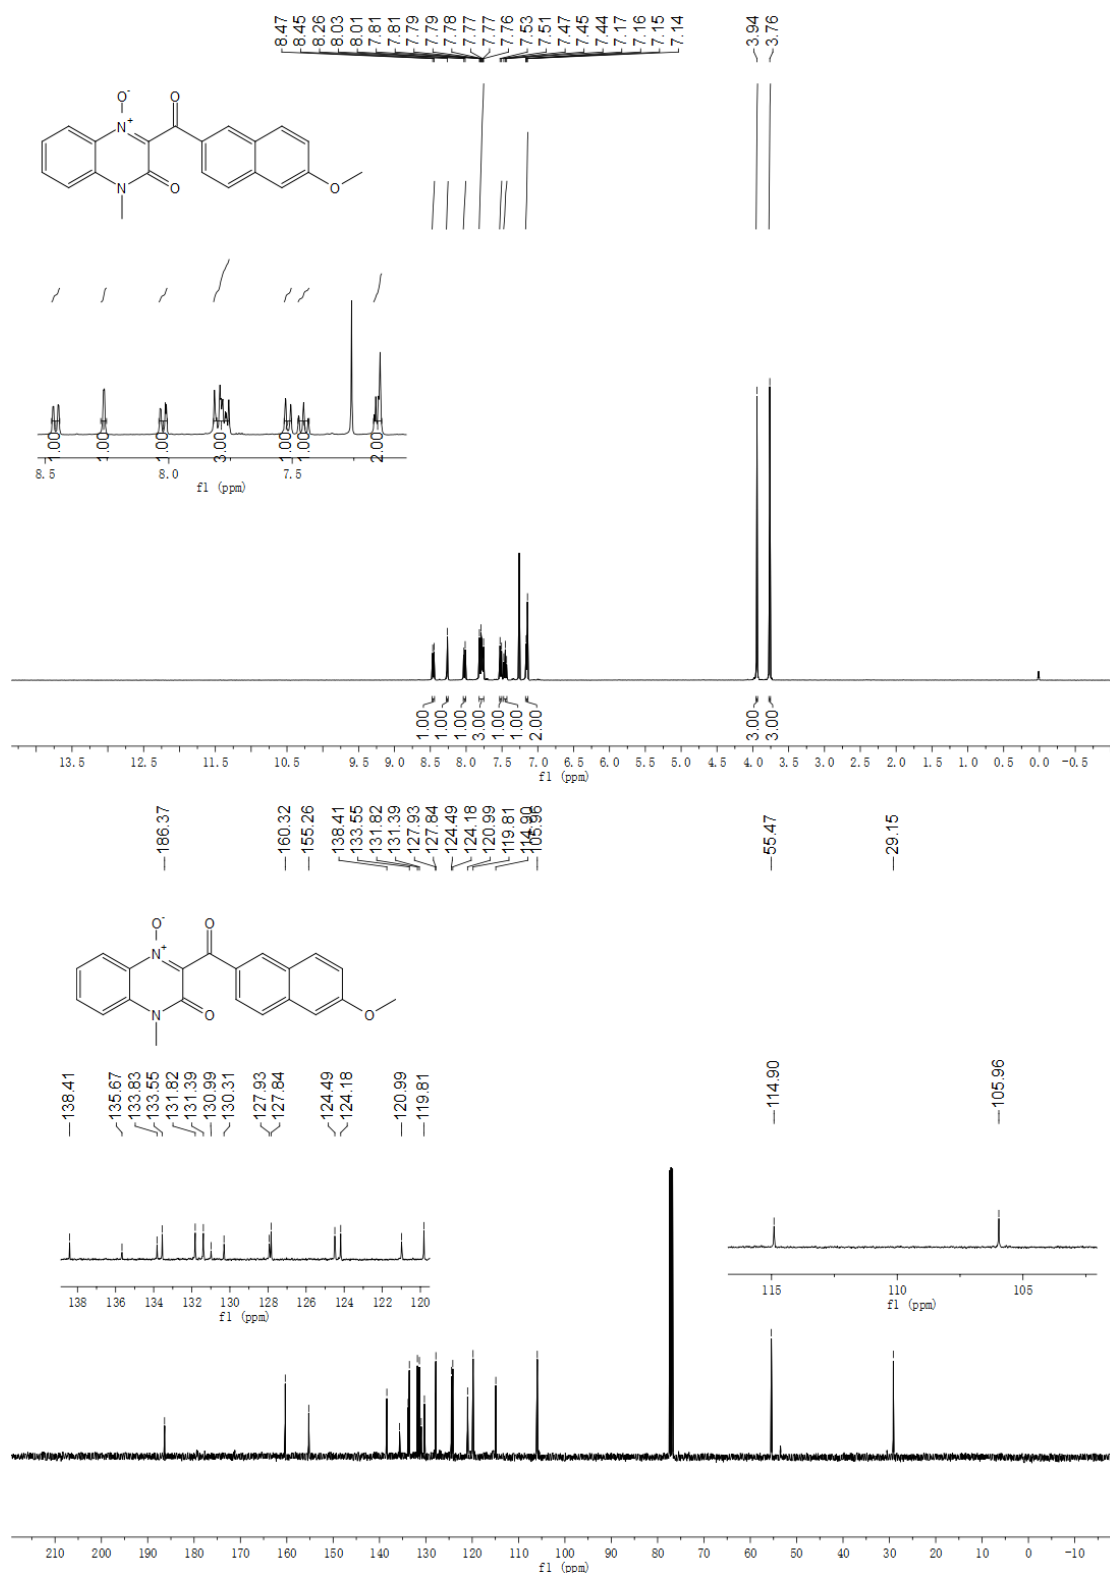

**3ak**

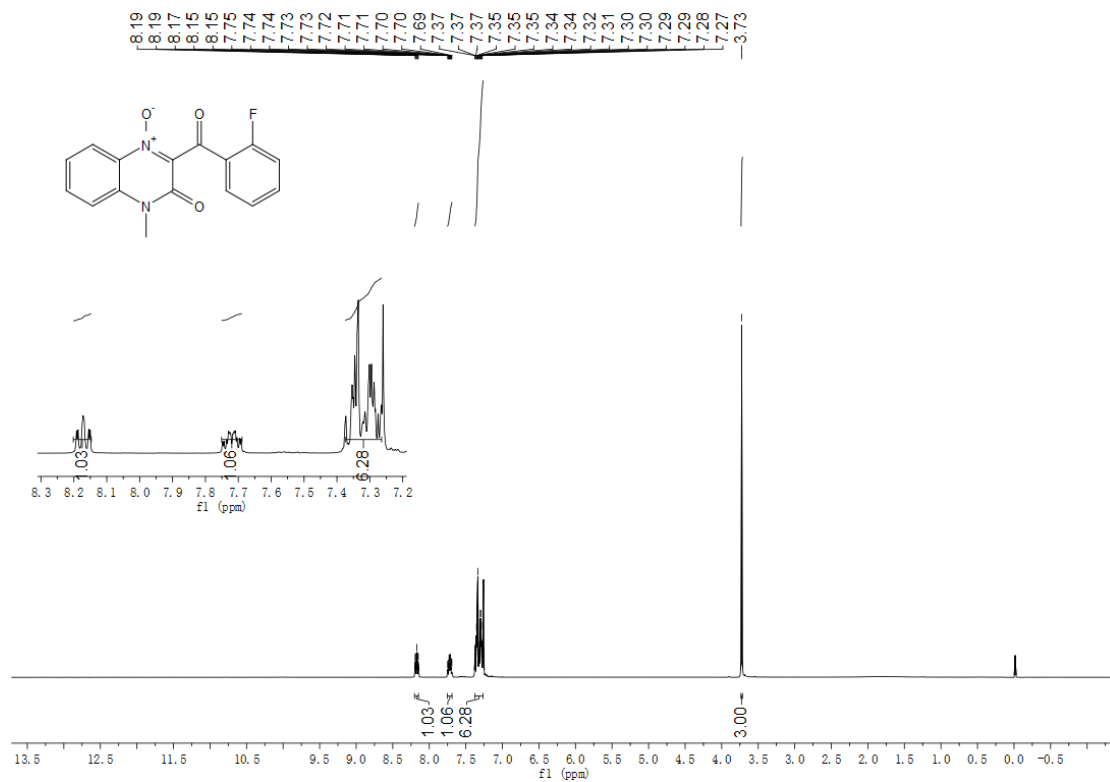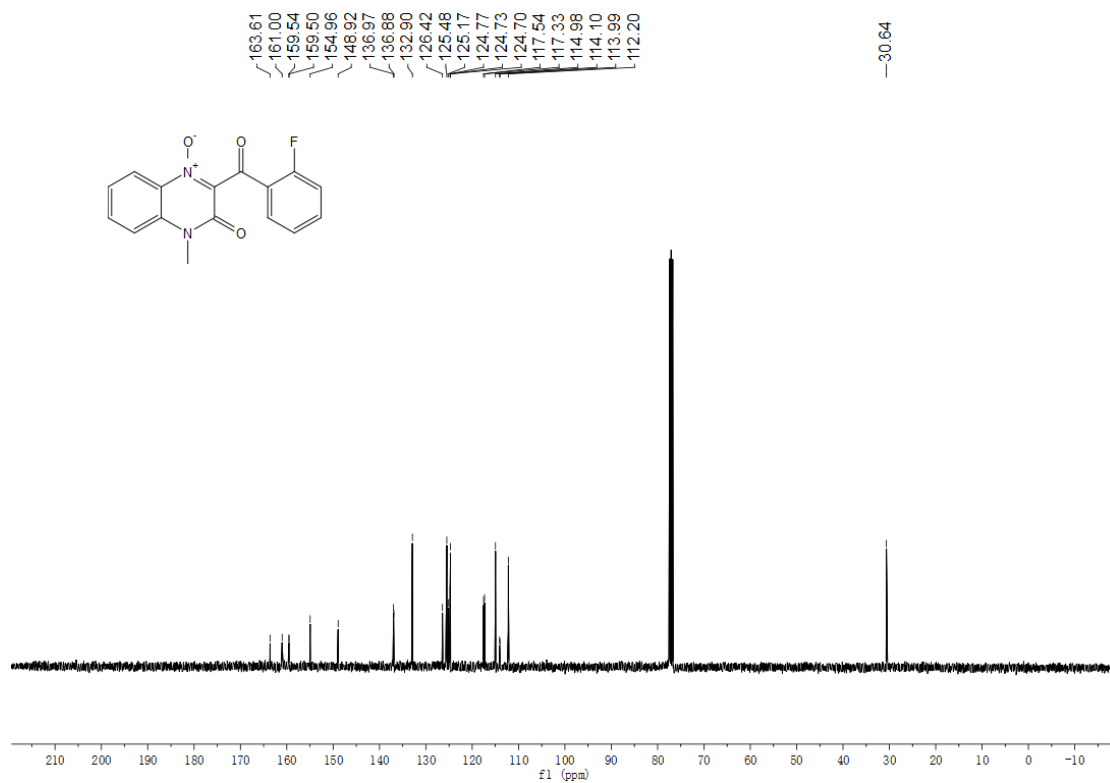



**3al**

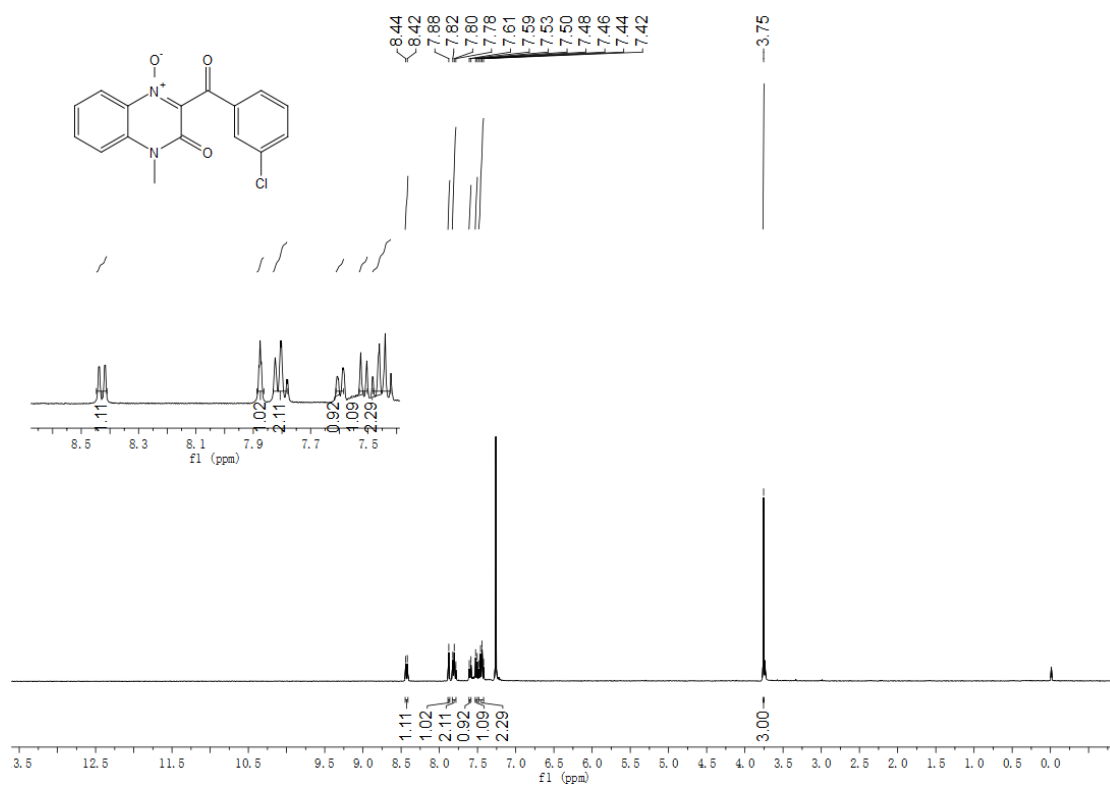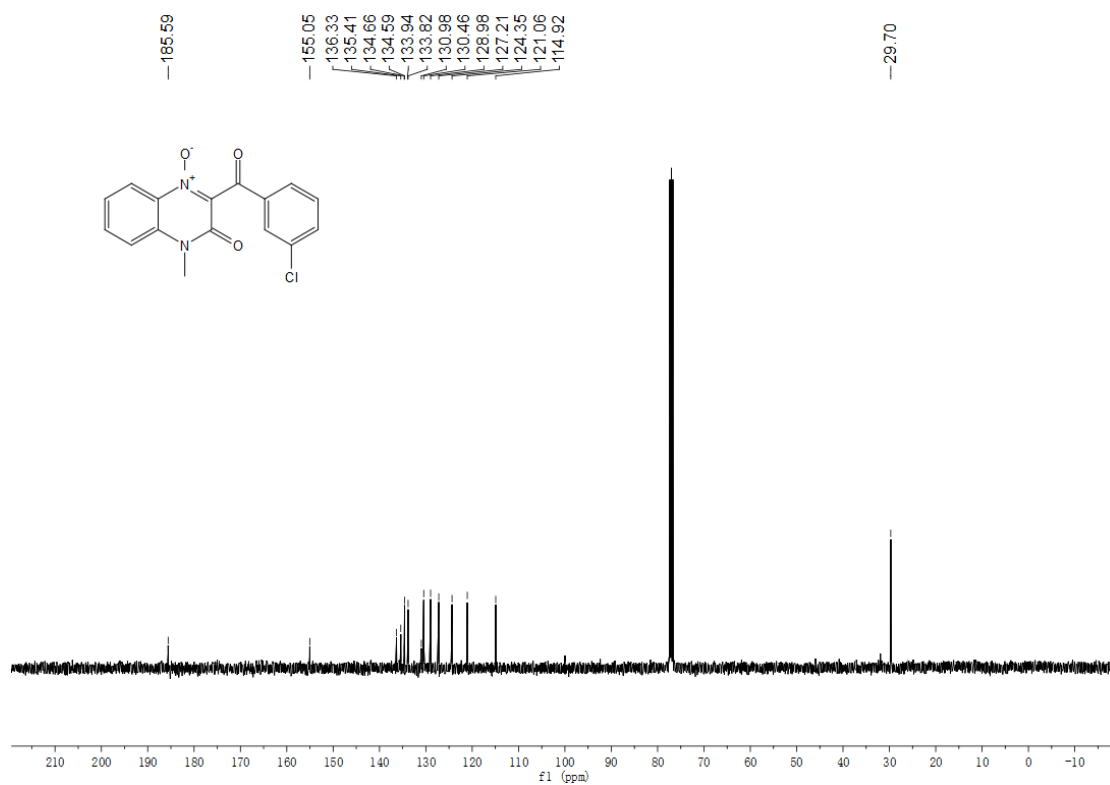

**3ba**

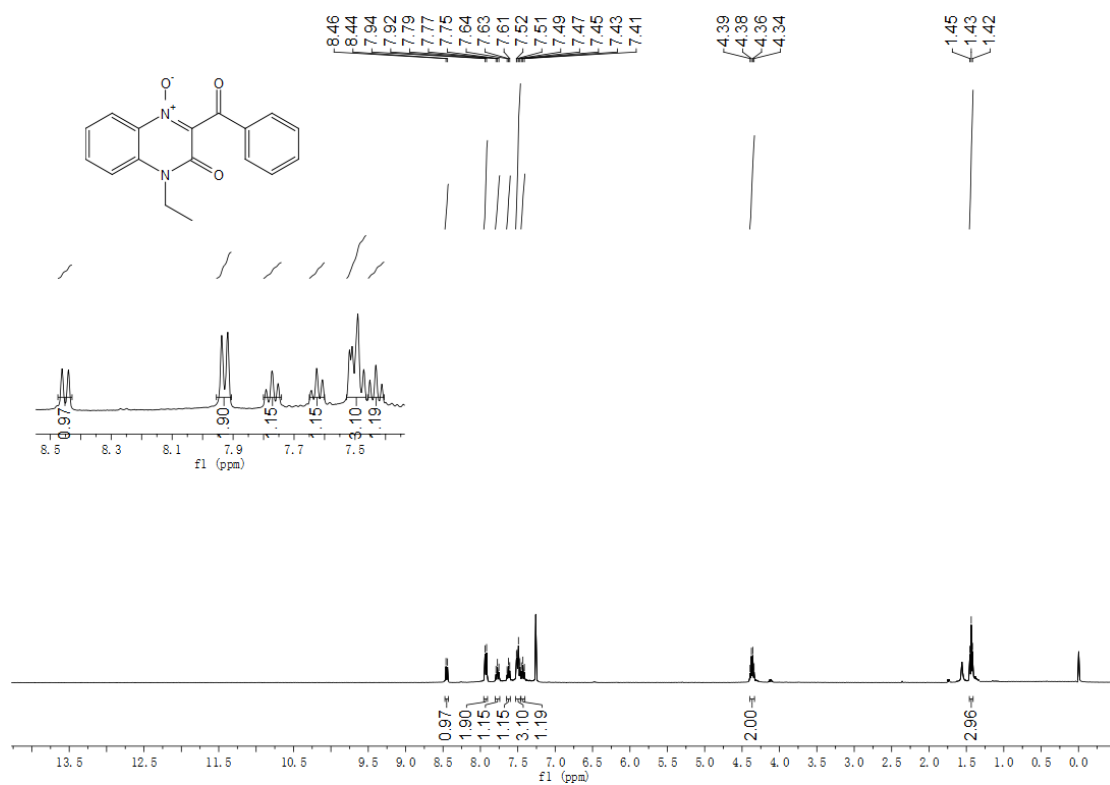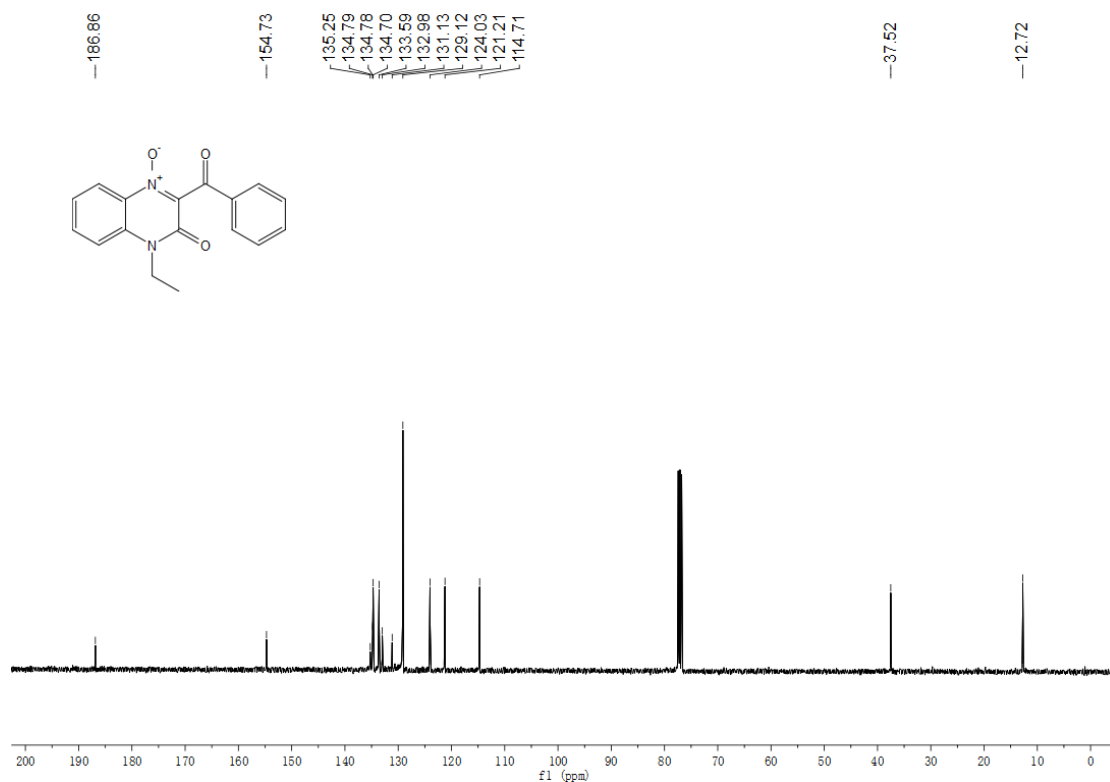

**3ca**

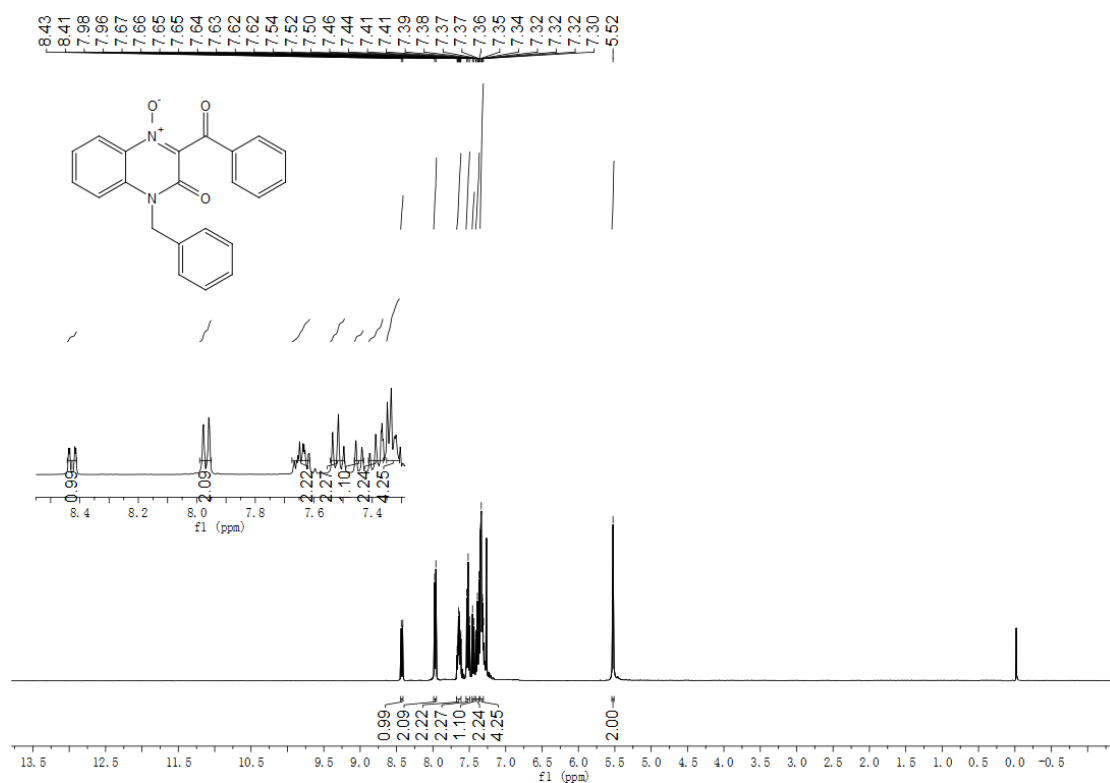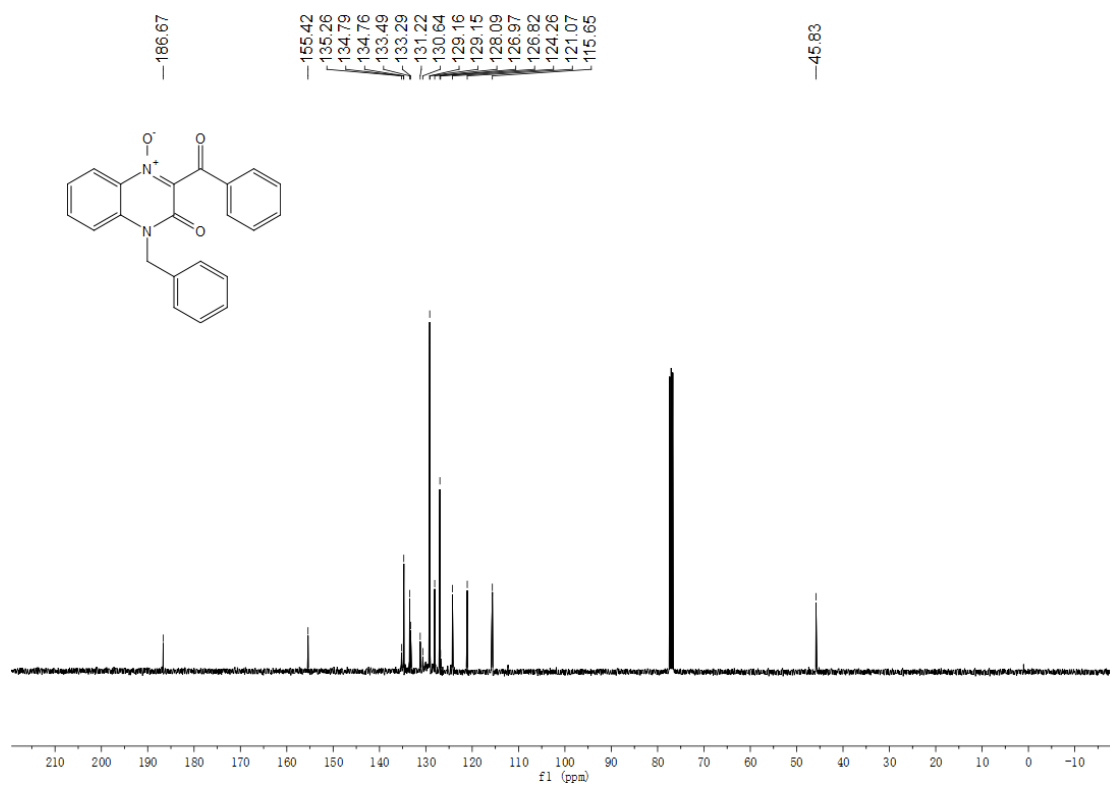

### 3da

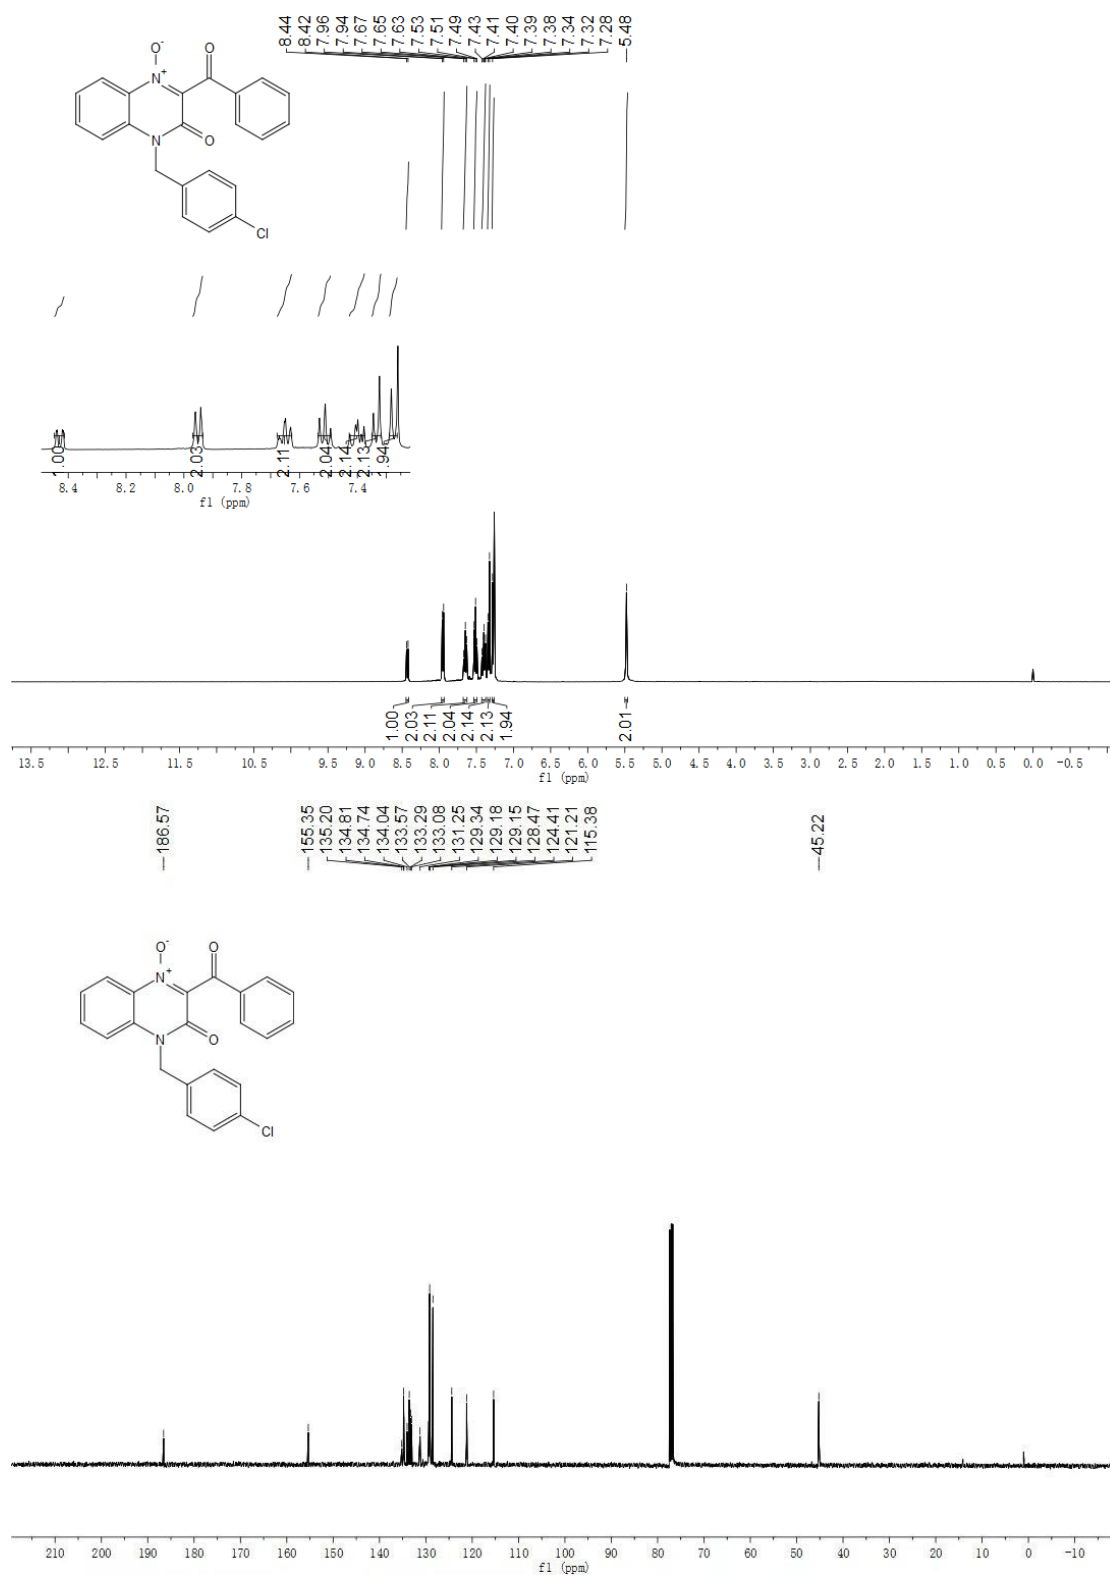

**3ea**

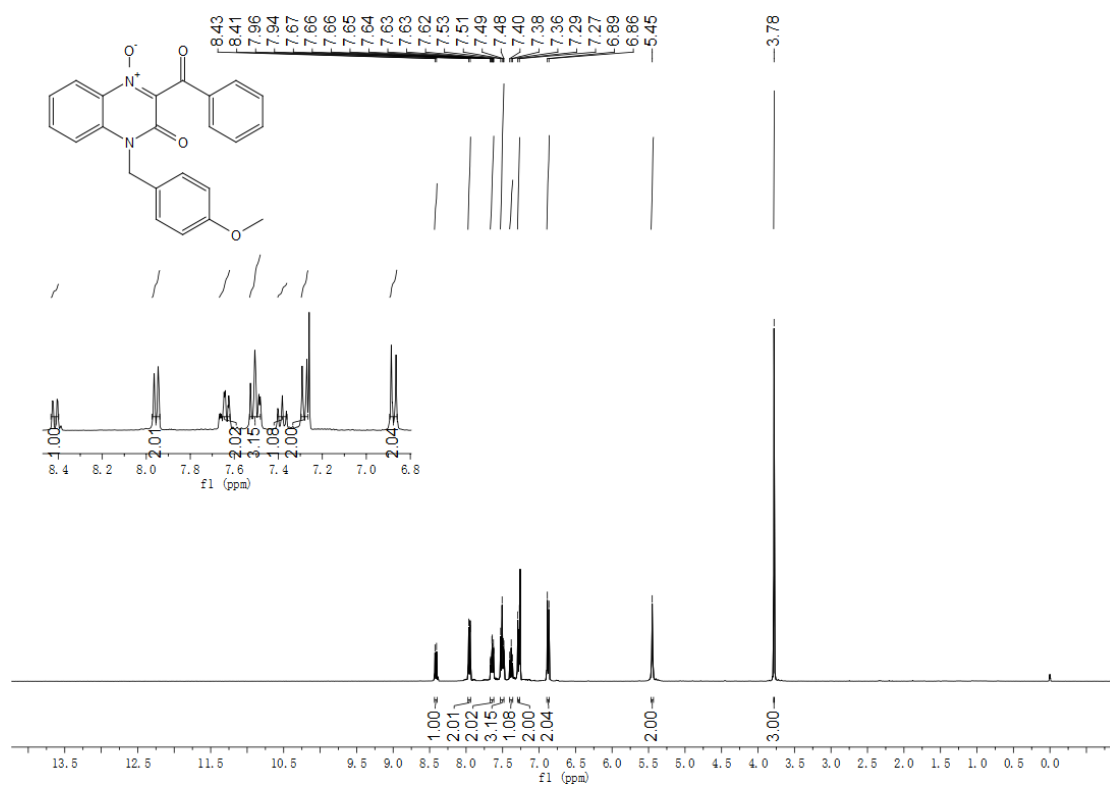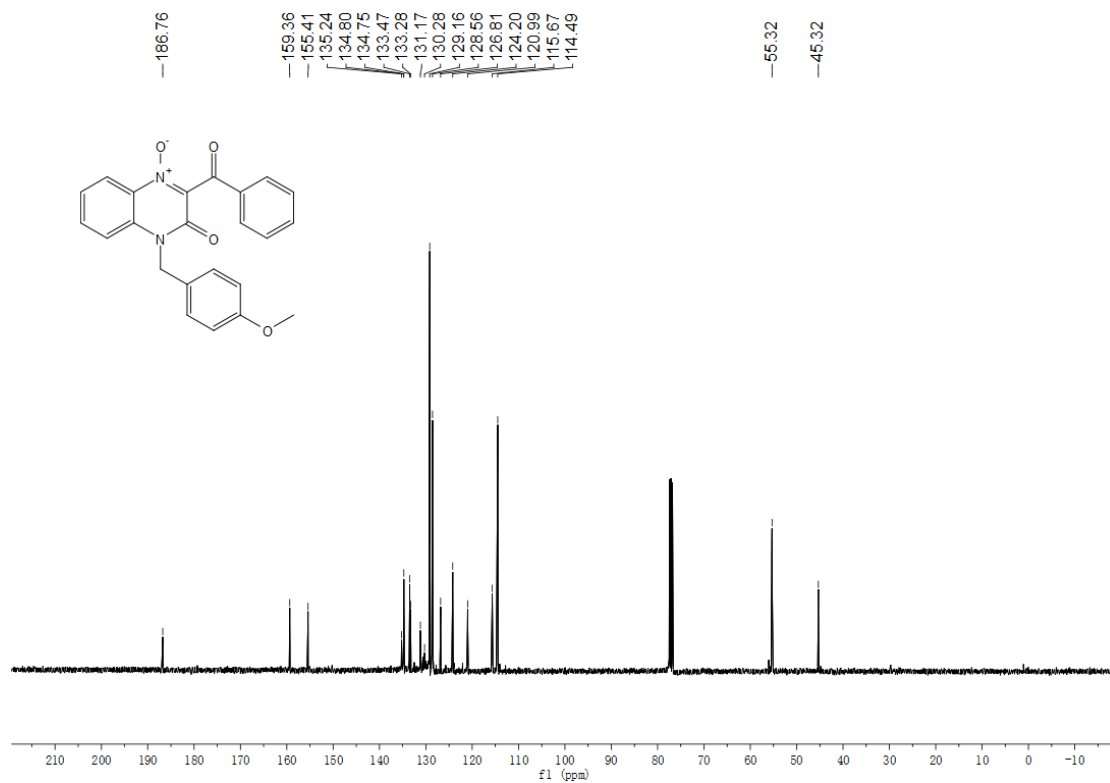

3fa

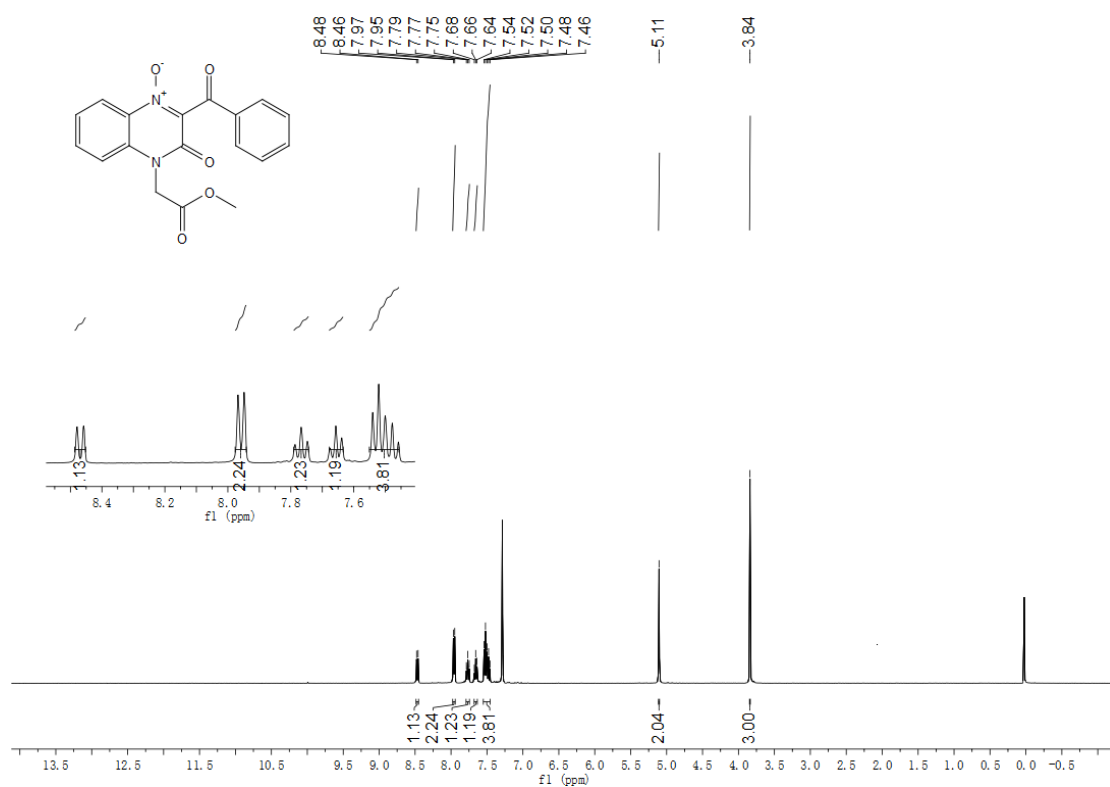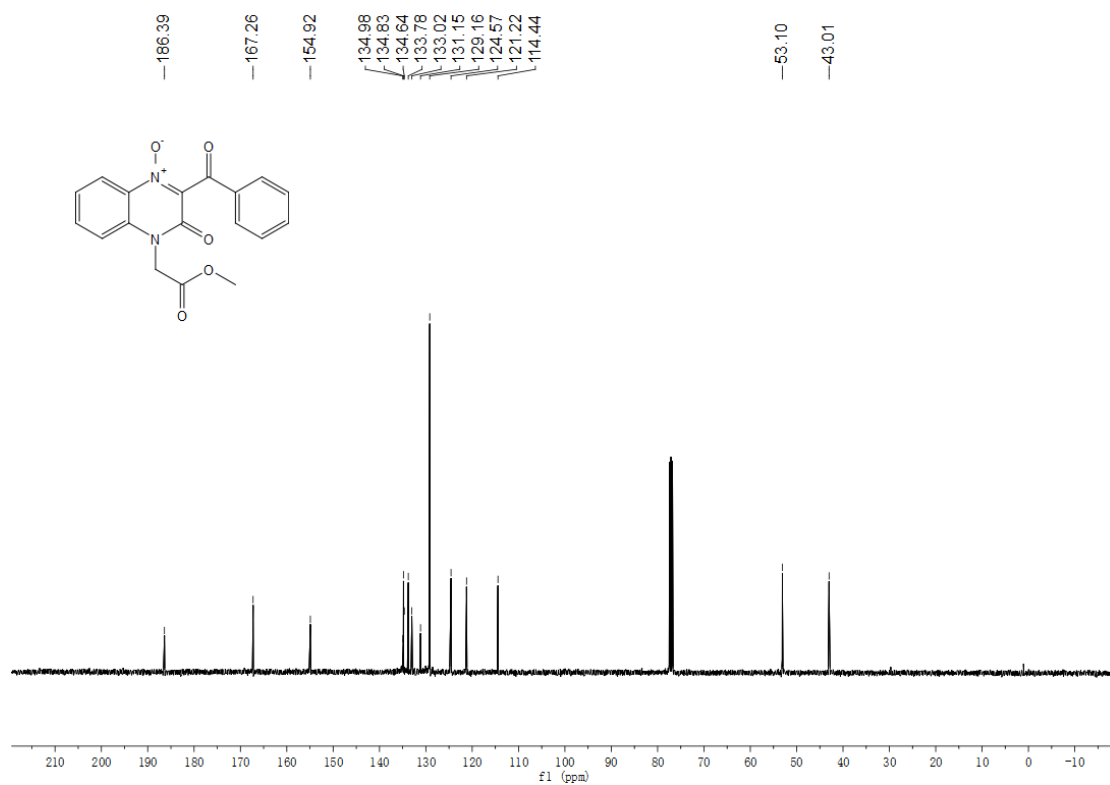

**3ga**

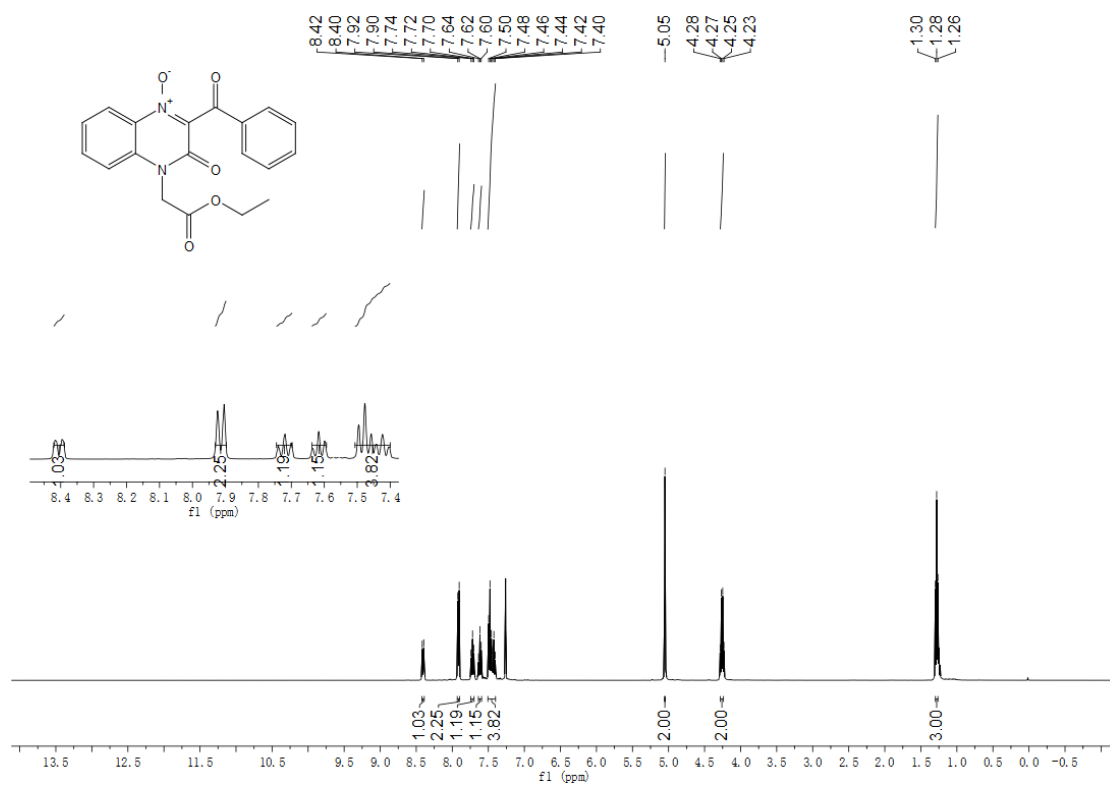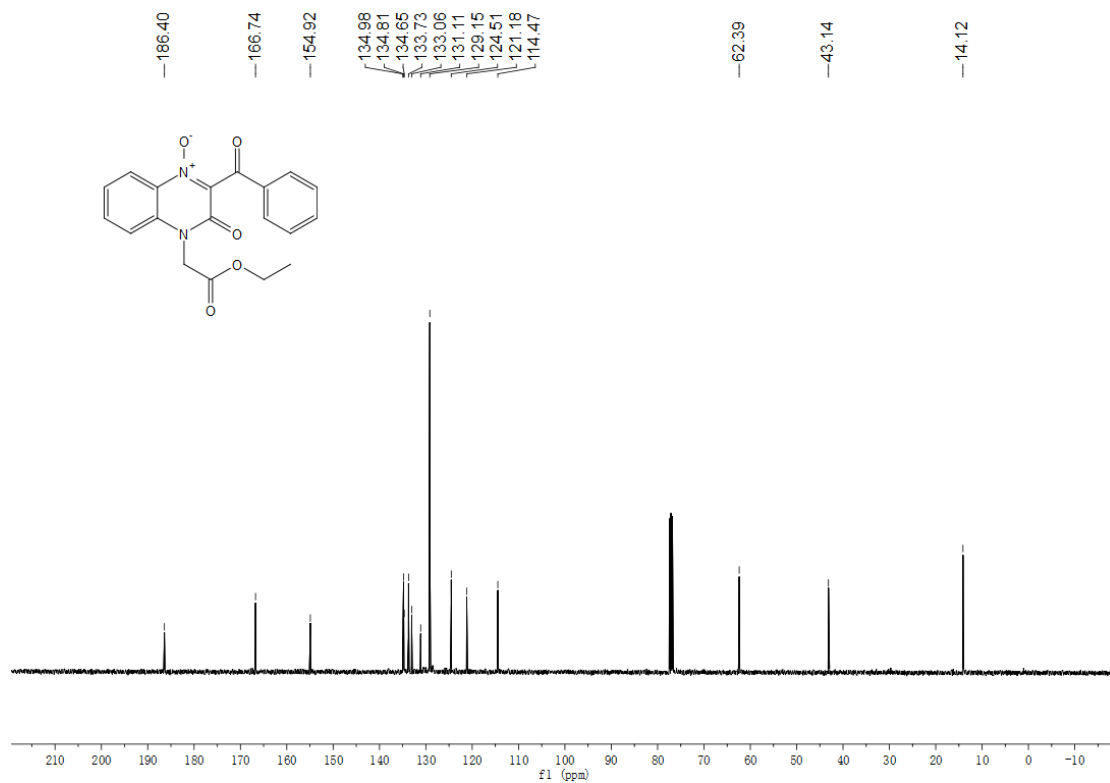

### 3ha

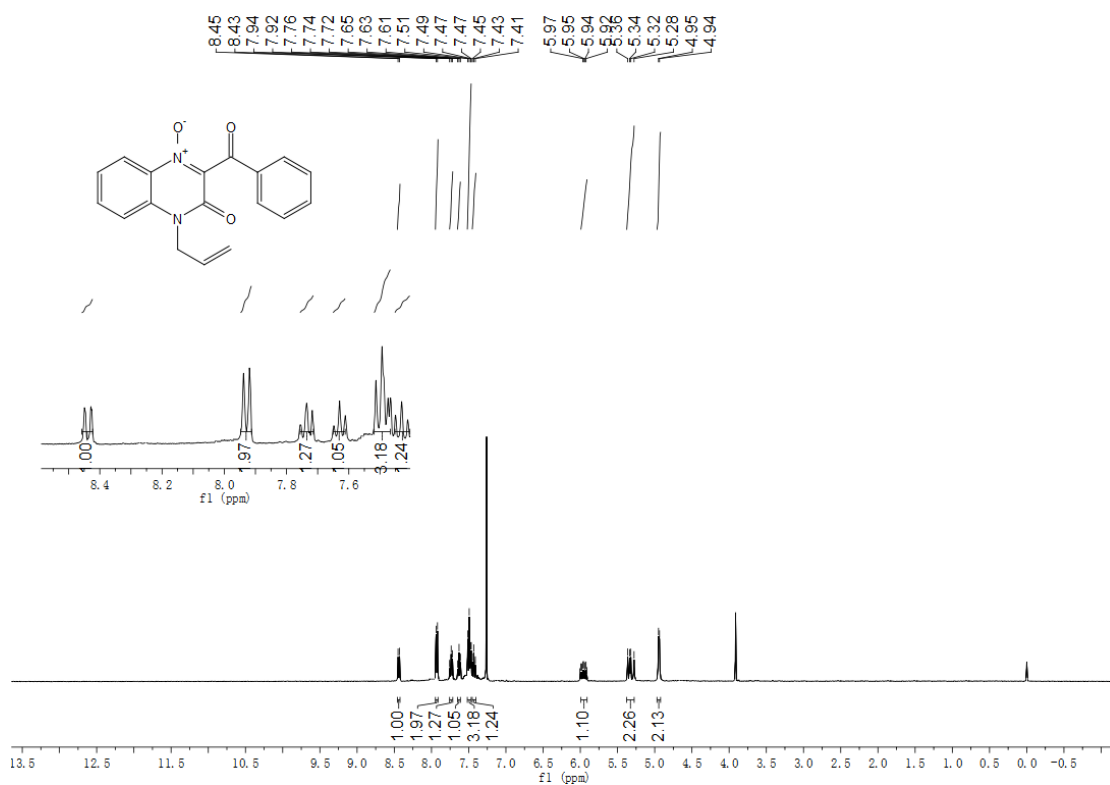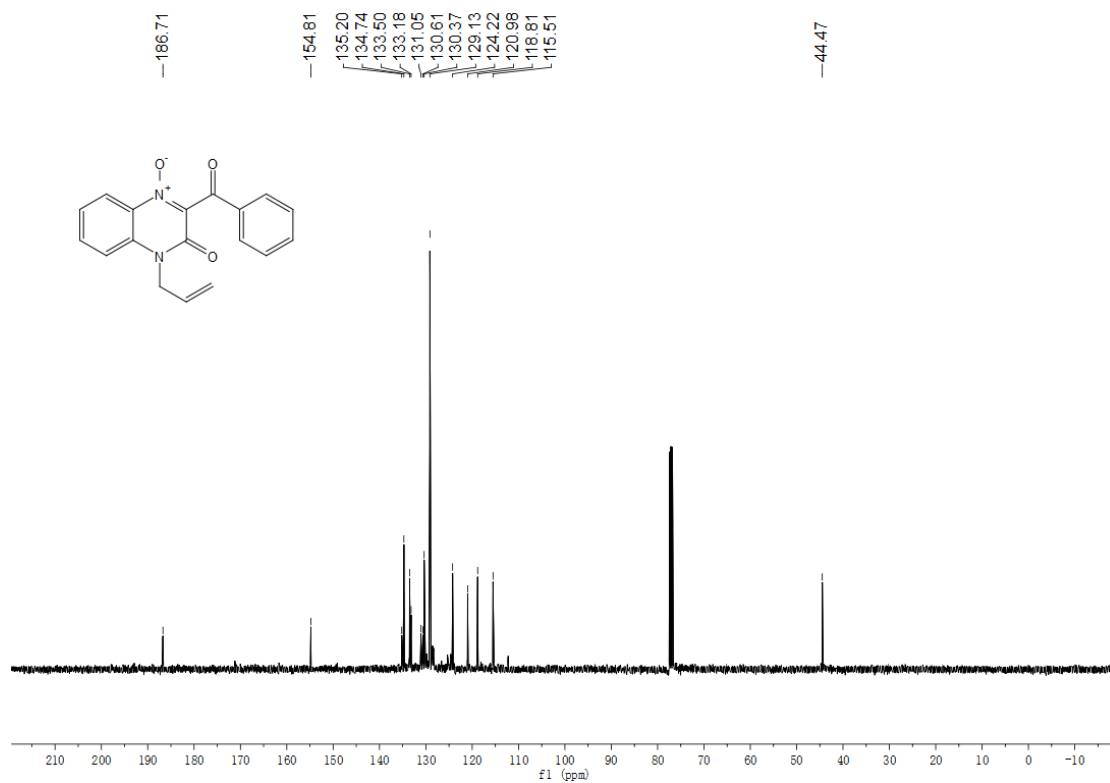



3ia

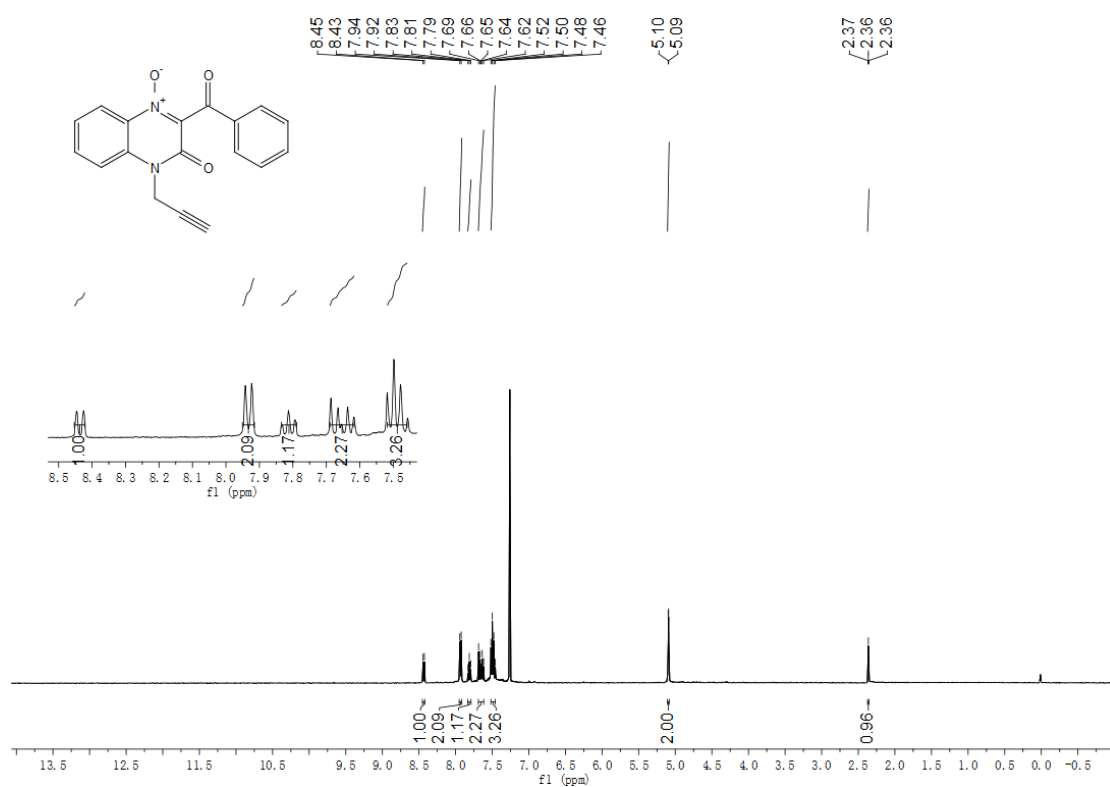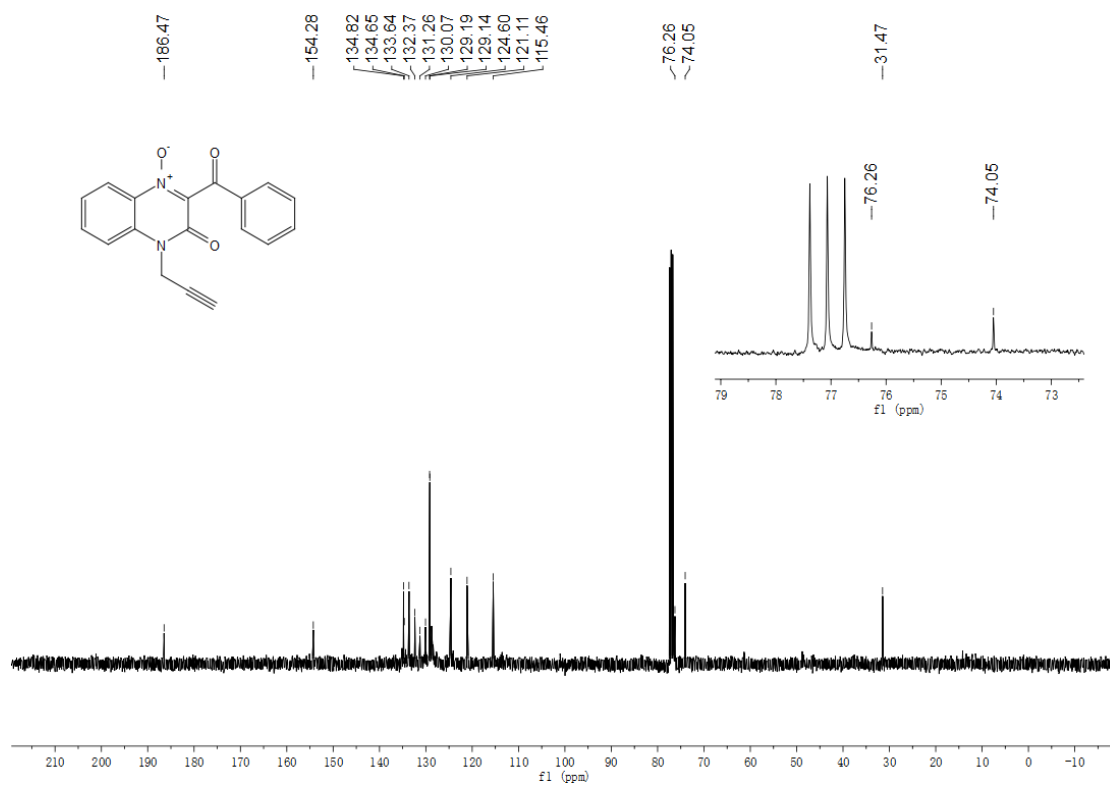

3ja

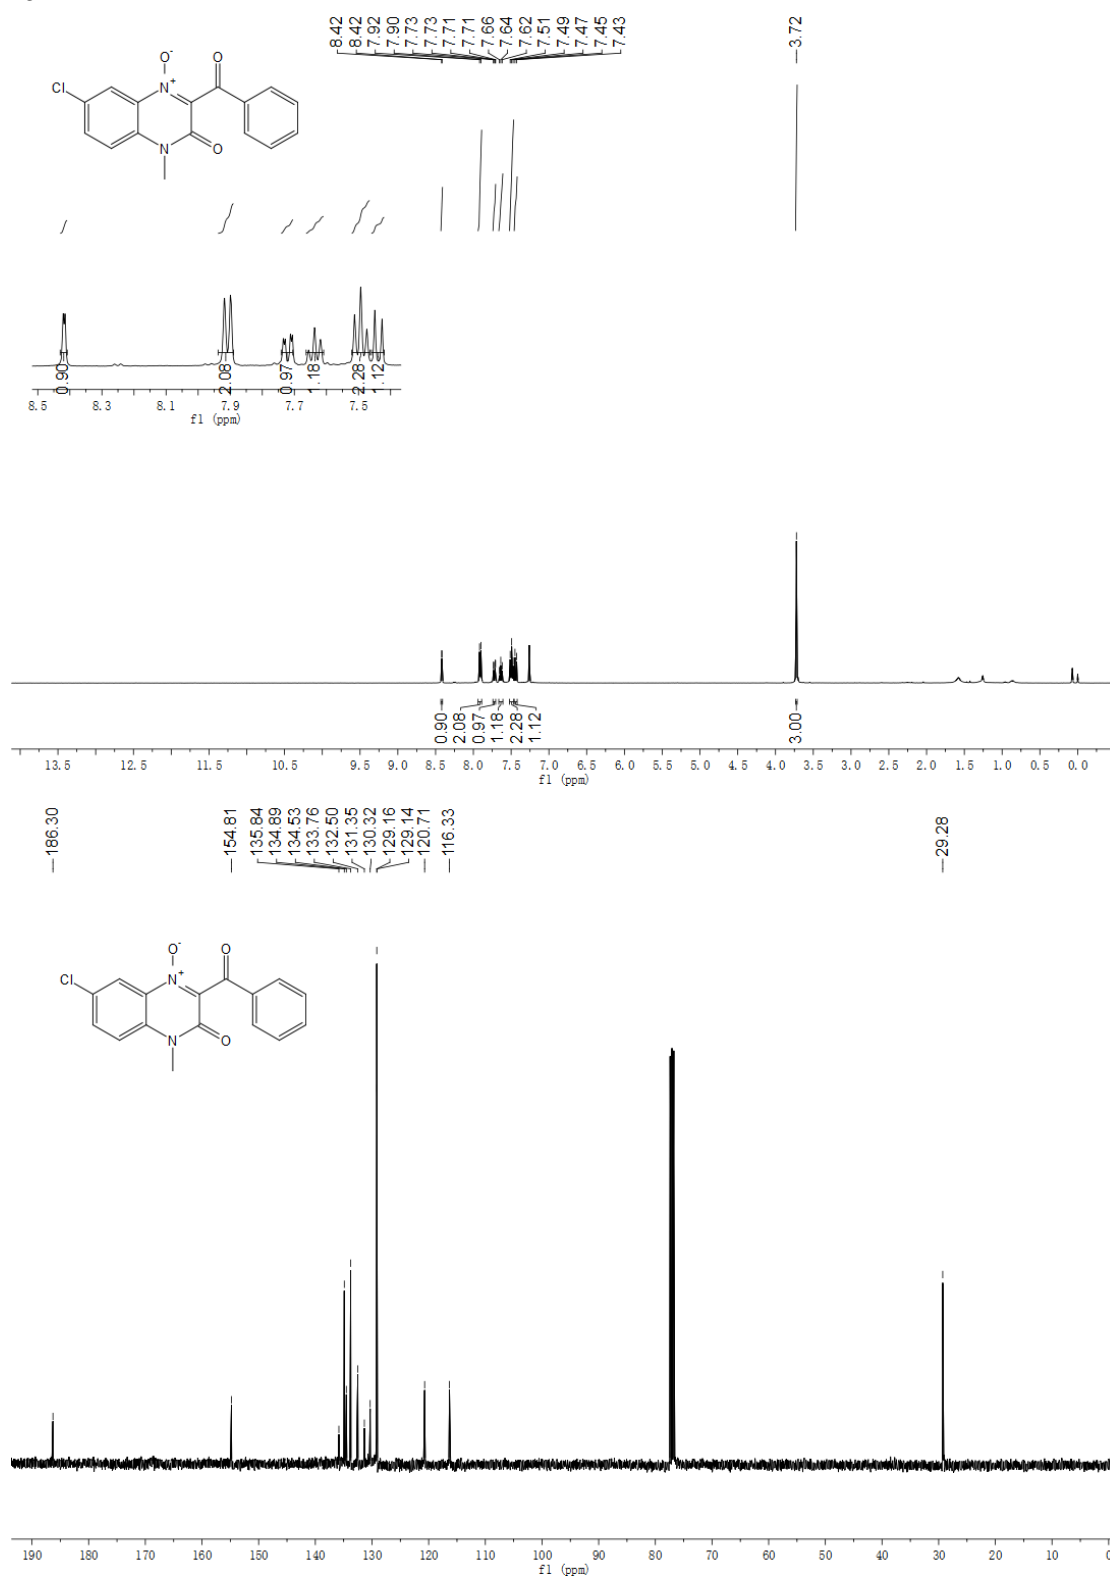

**3ka**

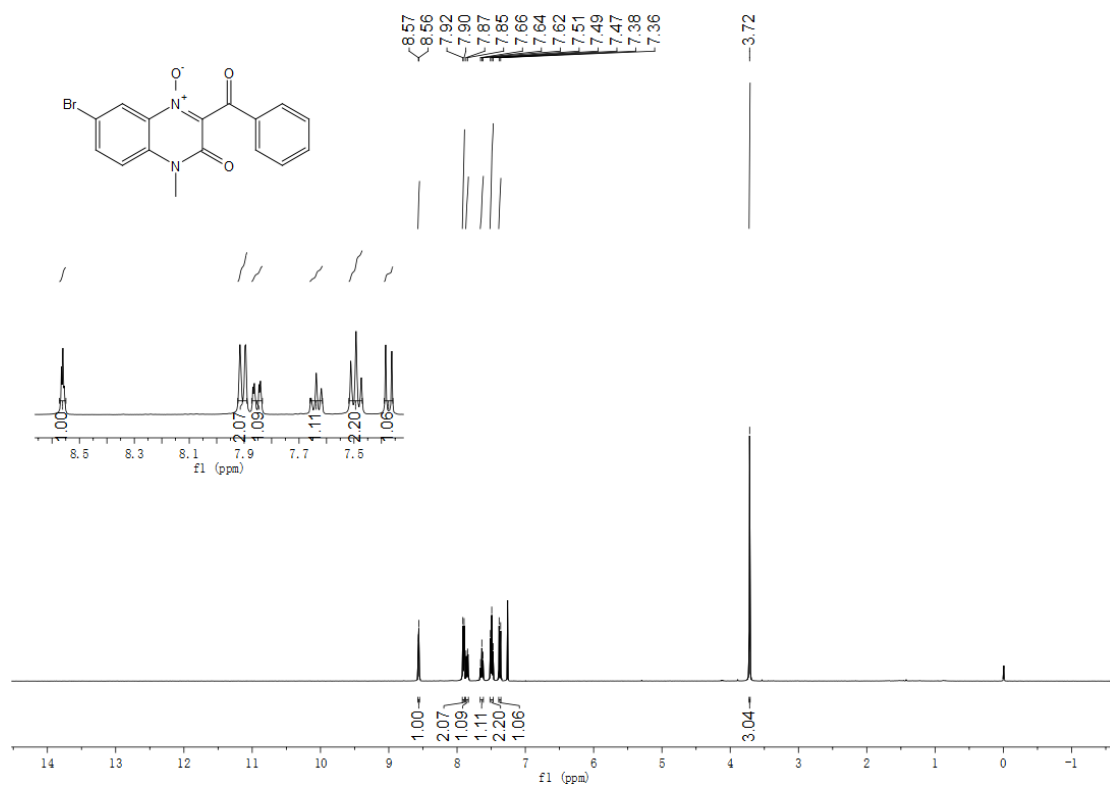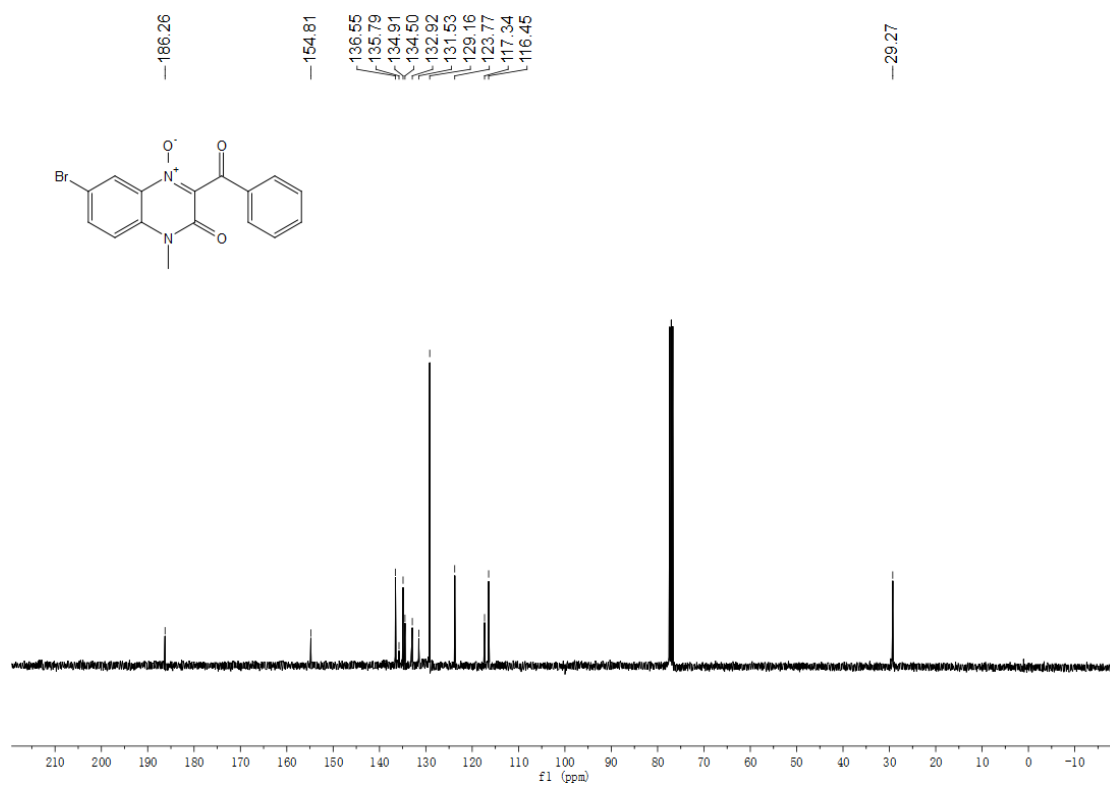

3la

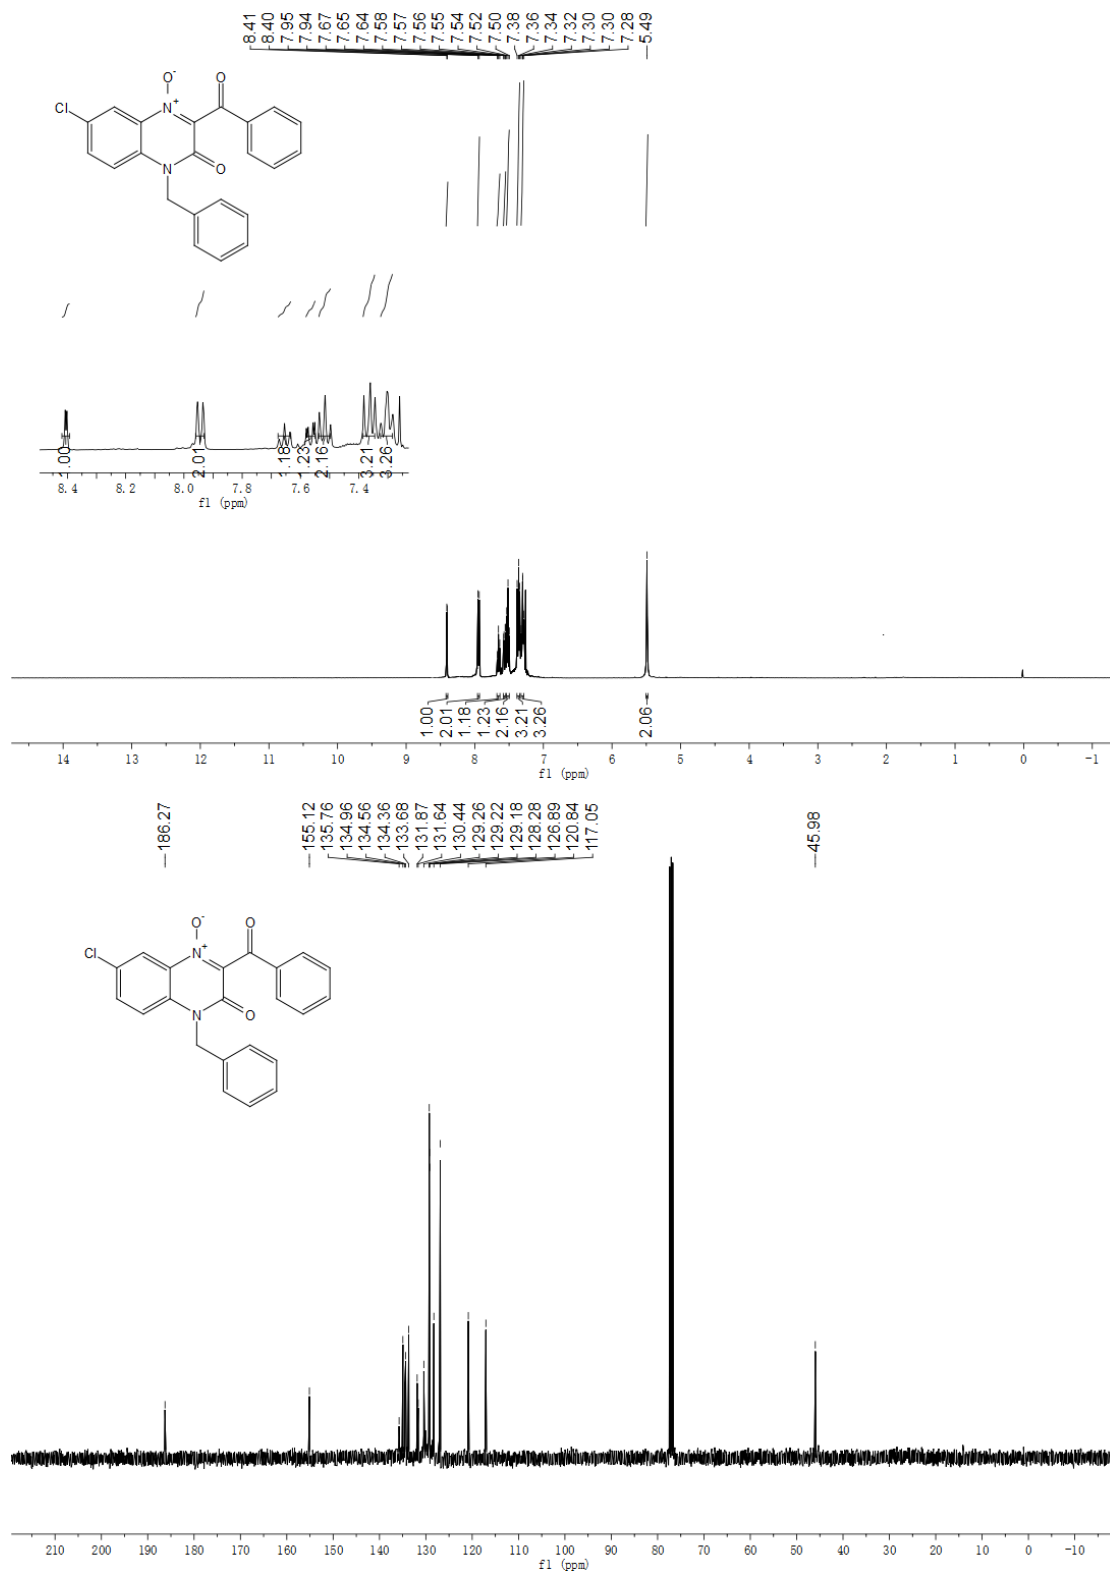

12

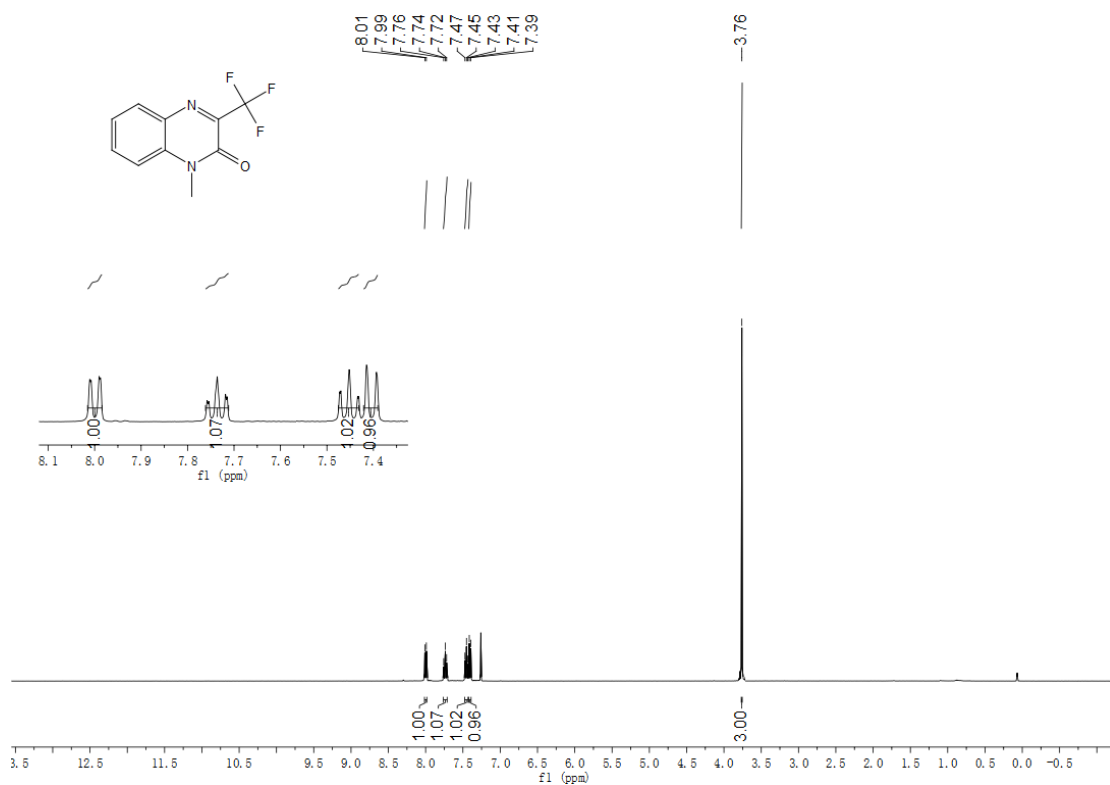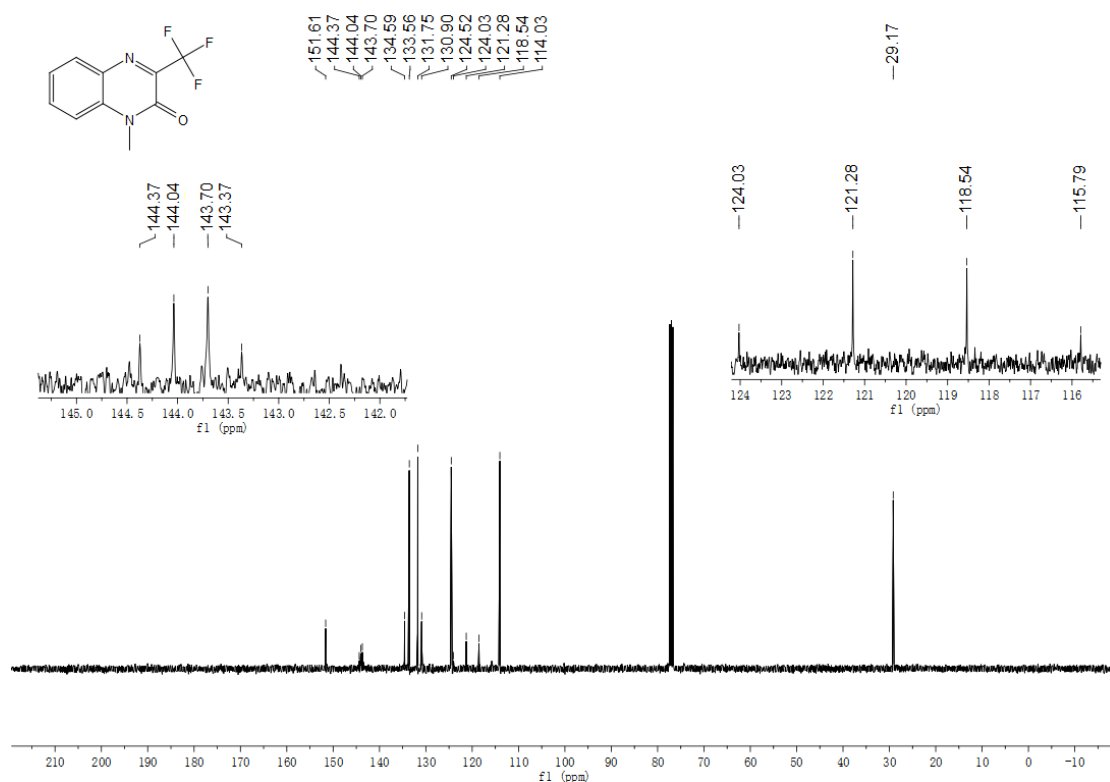

19

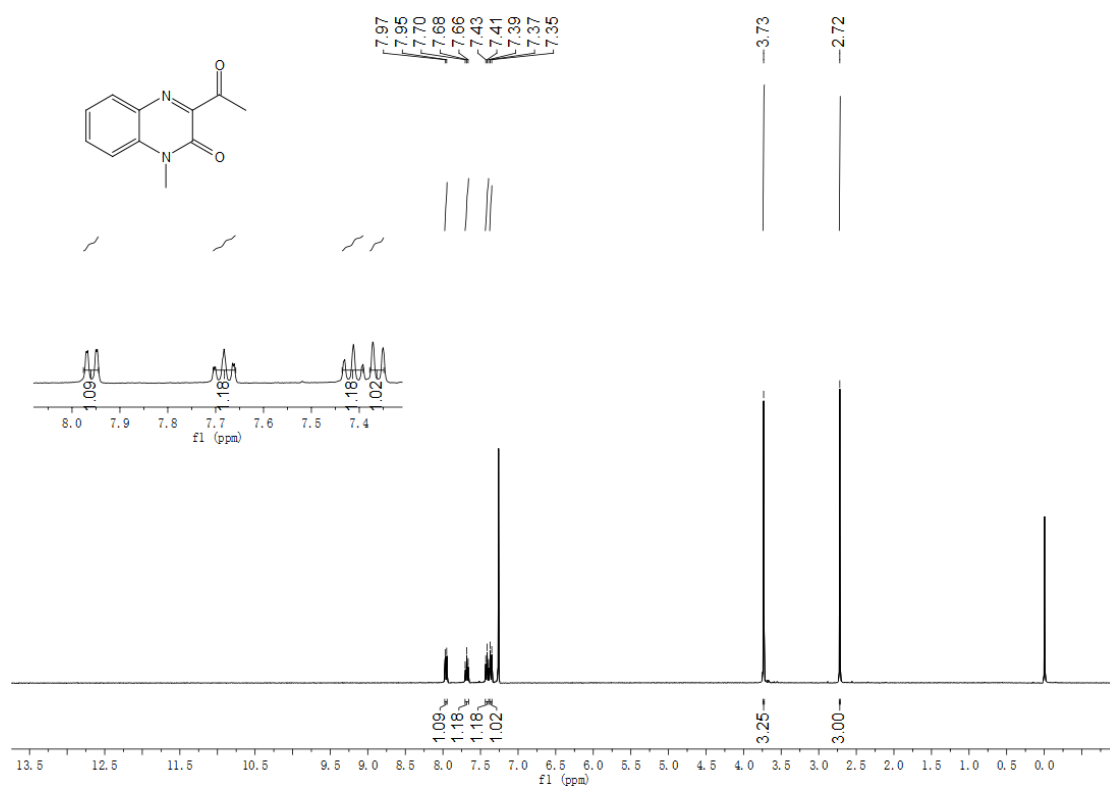

## 9. LC-MS spectra

3aa

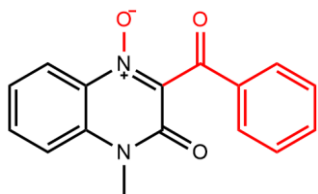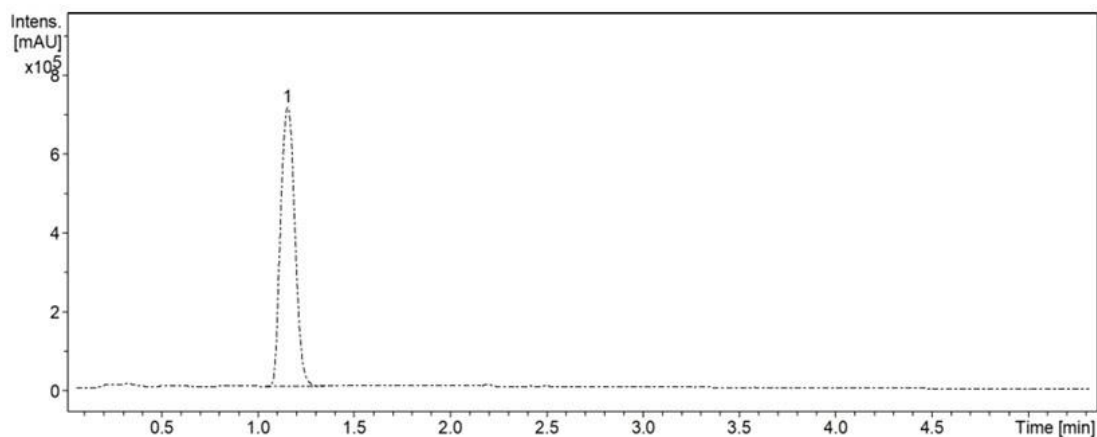

| # | RT [min] | Area    | Area Frac. % |
|---|----------|---------|--------------|
| 1 | 1.2      | 3661697 | 100.0        |

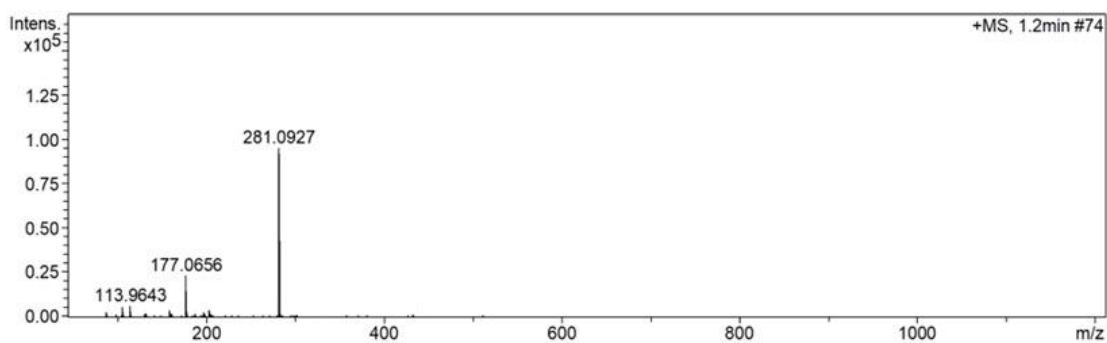

| Meas. m/z | # | Formula              | m/z      | err [ppm] | rdb  | N-Rule | e <sub>j</sub> Conf | mSigma |
|-----------|---|----------------------|----------|-----------|------|--------|---------------------|--------|
| 281.0927  | 1 | C 16 H 13 N 2 O 3    | 281.0921 | -2.1      | 11.5 | ok     | even                | 5.17   |
|           | 2 | C 12 H 9 N 8 O       | 281.0894 | -11.7     | 12.5 | ok     | even                | 9.76   |
|           | 3 | C 21 H 13 O          | 281.0961 | 12.2      | 15.5 | ok     | even                | 32.05  |
|           | 4 | C 15 H 18 Cl O 3     | 281.0939 | 4.4       | 6.5  | ok     | even                | 142.71 |
|           | 5 | C 11 H 14 Cl N 6 O   | 281.0912 | -5.2      | 7.5  | ok     | even                | 155.01 |
|           | 6 | C 10 H 18 Cl N 2 O 5 | 281.0899 | -9.9      | 2.5  | ok     | even                | 159.90 |

**HPLC Condition: Column:** Agilent Zorbax SB C18, 2.1\*50 mm, 1.8 um

**Eluent:** ACN/H<sub>2</sub>O, A % 0-5-7 min, 30-70-70 %

**Flow rate:** 0.7ml/min

**Detection:** UV254nm

**3ab**

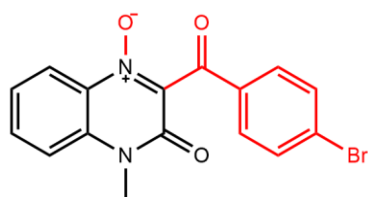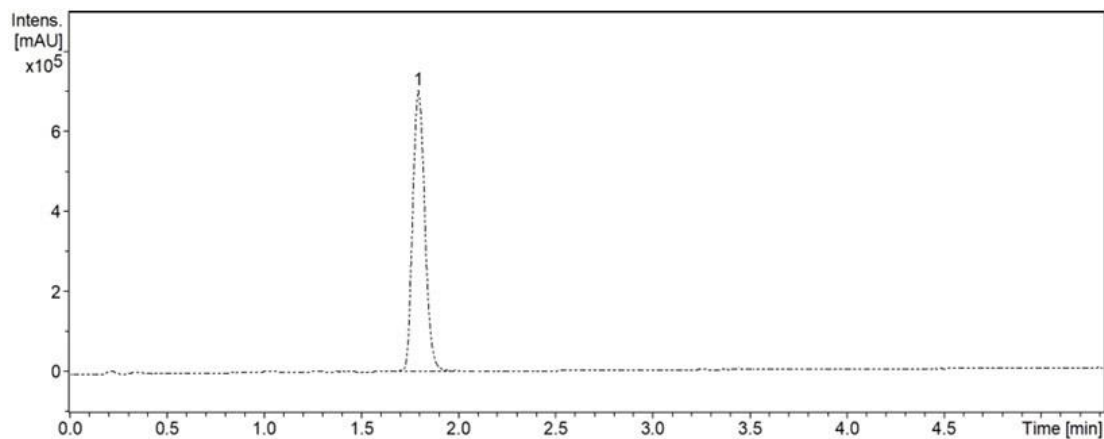

| # | RT [min] | Area    | Area Frac. % |
|---|----------|---------|--------------|
| 1 | 1.8      | 3067251 | 100.0        |

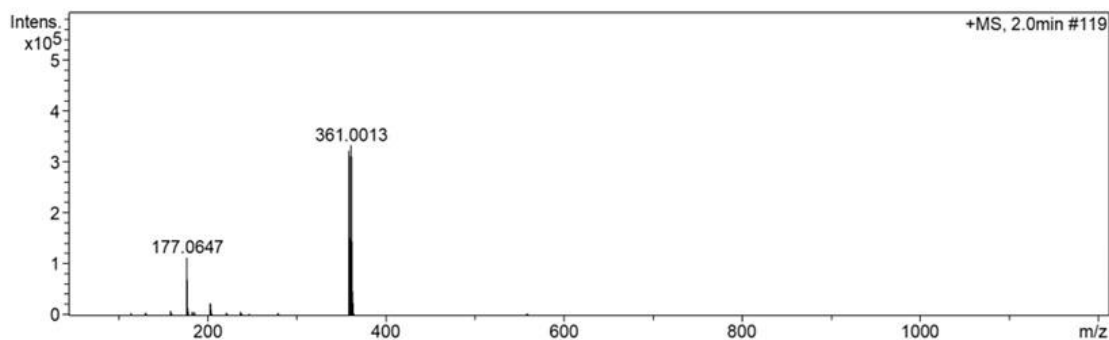

| Meas. m/z | #  | Formula              | m/z      | err [ppm] | rdb  | N-Rule | e <sub>1</sub> Conf | mSigma |
|-----------|----|----------------------|----------|-----------|------|--------|---------------------|--------|
| 359.0036  | 1  | C 12 H 8 Br N 8 O    | 358.9999 | -10.3     | 12.5 | ok     | even                | 19.01  |
|           | 2  | C 16 H 12 Br N 2 O 3 | 359.0026 | -2.8      | 11.5 | ok     | even                | 19.10  |
|           | 3  | C 21 H 12 Br O       | 359.0066 | 8.4       | 15.5 | ok     | even                | 41.45  |
|           | 4  | C 16 H 7 O 10        | 359.0034 | -0.6      | 13.5 | ok     | even                | 488.29 |
|           | 5  | C 17 H 3 N 4 O 6     | 359.0047 | 3.1       | 18.5 | ok     | even                | 559.96 |
|           | 6  | C 12 H 3 N 6 O 8     | 359.0007 | -8.1      | 14.5 | ok     | even                | 562.24 |
| 361.0013  | 1  | C 13 H 5 N 4 O 9     | 361.0051 | 10.5      | 13.5 | ok     | even                | 4.22   |
|           | 2  | C 9 H N 10 O 7       | 361.0024 | 3.1       | 14.5 | ok     | even                | 9.91   |
|           | 3  | C 12 H 9 O 13        | 361.0038 | 6.8       | 8.5  | ok     | even                | 11.69  |
|           | 4  | C 8 H 5 N 6 O 11     | 361.0011 | -0.6      | 9.5  | ok     | even                | 22.25  |
|           | 5  | C 19 H 5 O 8         | 360.9979 | -9.4      | 17.5 | ok     | even                | 32.11  |
|           | 6  | C 20 H N 4 O 4       | 360.9992 | -5.7      | 22.5 | ok     | even                | 46.38  |
|           | 7  | C 25 H N 2 O 2       | 361.0033 | 5.4       | 26.5 | ok     | even                | 73.68  |
|           | 8  | C 8 H 10 Br N 8 O 4  | 361.0003 | -2.8      | 7.5  | ok     | even                | 432.47 |
|           | 9  | C 9 H 6 Br N 12      | 361.0016 | 0.9       | 12.5 | ok     | even                | 432.57 |
|           | 10 | C 13 H 10 Br N 6 O 2 | 361.0043 | 8.3       | 11.5 | ok     | even                | 437.50 |
|           | 11 | C 12 H 14 Br N 2 O 6 | 361.0030 | 4.6       | 6.5  | ok     | even                | 438.03 |

**HPLC Condition: Column:** Agilent Zorbax SB C18, 2.1\*50 mm, 1.8 um

**Eluent:** ACN/H<sub>2</sub>O, A % 0-5-7 min, 30-70-70 %

**Flow rate:** 0.7ml/min

**Detection:** UV254nm



3ac

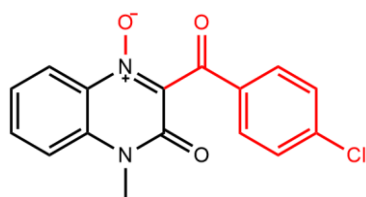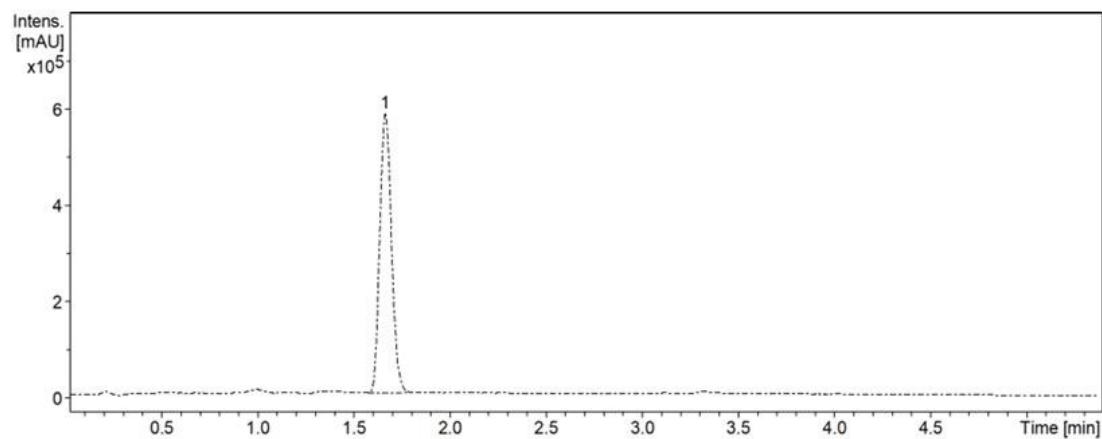

| # | RT [min] | Area    | Area Frac. % |
|---|----------|---------|--------------|
| 1 | 1.7      | 2471133 | 100.0        |

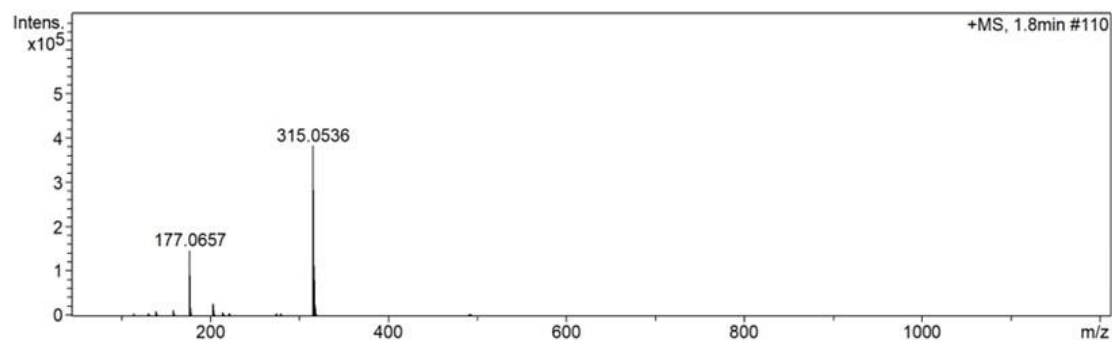

| Meas. m/z | # | Formula              | m/z      | err [ppm] | rdb  | N-Rule | e <sub>j</sub> Conf | mSigma |
|-----------|---|----------------------|----------|-----------|------|--------|---------------------|--------|
| 315.0536  | 1 | C 12 H 8 Cl N 8 O    | 315.0504 | -10.2     | 12.5 | ok     | even                | 19.96  |
|           | 2 | C 16 H 12 Cl N 2 O 3 | 315.0531 | -1.7      | 11.5 | ok     | even                | 23.16  |
|           | 3 | C 21 H 12 Cl O       | 315.0571 | 11.1      | 15.5 | ok     | even                | 37.24  |
|           | 4 | C 16 H 11 O 7        | 315.0499 | -11.7     | 11.5 | ok     | even                | 152.23 |
|           | 5 | C 17 H 7 N 4 O 3     | 315.0513 | -7.5      | 16.5 | ok     | even                | 155.51 |
|           | 6 | C 9 H 15 O 12        | 315.0558 | 6.9       | 2.5  | ok     | even                | 155.83 |
|           | 7 | C 10 H 11 N 4 O 8    | 315.0571 | 11.2      | 7.5  | ok     | even                | 156.92 |
|           | 8 | C 22 H 7 N 2 O       | 315.0553 | 5.3       | 20.5 | ok     | even                | 158.99 |

**HPLC Condition: Column:** Agilent Zorbax SB C18, 2.1\*50 mm, 1.8 um

**Eluent:** ACN/H<sub>2</sub>O, A % 0-5-7 min, 30-70-70 %

**Flow rate:** 0.7ml/min

**Detection:** UV254nm

### 3ad

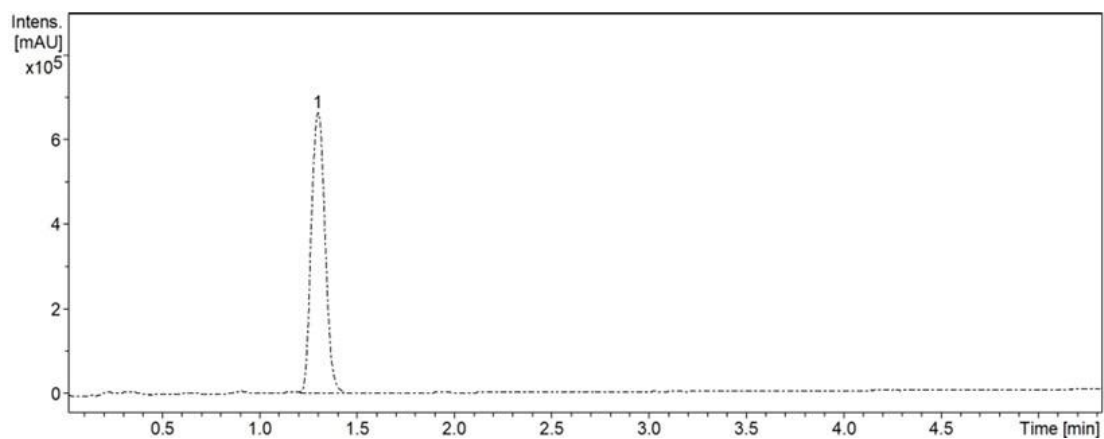

| # | RT [min] | Area    | Area Frac. % |
|---|----------|---------|--------------|
| 1 | 1.3      | 3258837 | 100.0        |

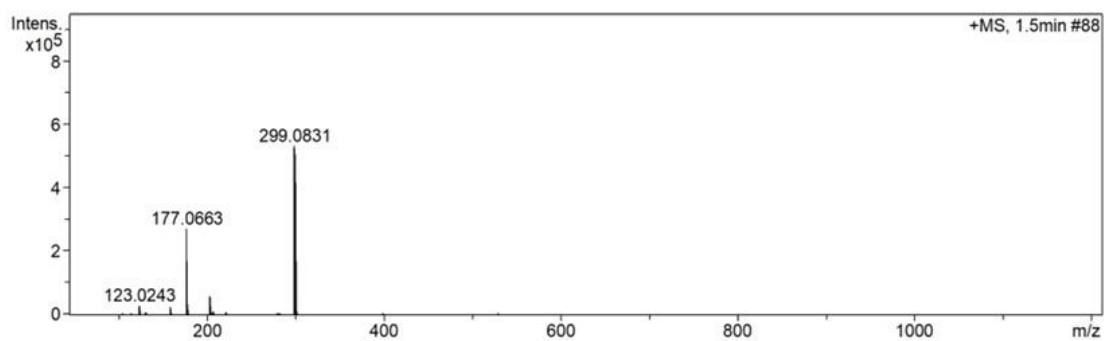

| Meas. m/z | # | Formula             | m/z      | err [ppm] | rdb  | N-Rule | e <sub>i</sub> | Conf | mSigma |
|-----------|---|---------------------|----------|-----------|------|--------|----------------|------|--------|
| 299.0831  | 1 | C 19 H 11 N 2 O 2   | 299.0815 | -5.4      | 15.5 | ok     | even           |      | 2.17   |
|           | 2 | C 21 H 12 F O       | 299.0867 | 11.9      | 15.5 | ok     | even           |      | 6.13   |
|           | 3 | C 16 H 12 F N 2 O 3 | 299.0826 | -1.6      | 11.5 | ok     | even           |      | 21.06  |
|           | 4 | C 24 H 11           | 299.0855 | 8.0       | 19.5 | ok     | even           |      | 25.06  |

**HPLC Condition:** Column: Agilent Zorbax SB C18, 2.1\*50 mm, 1.8 um

**Eluent:** ACN/H<sub>2</sub>O, A % 0-5-7 min, 30-70-70 %

**Flow rate:** 0.7ml/min

**Detection:** UV254nm

3ae

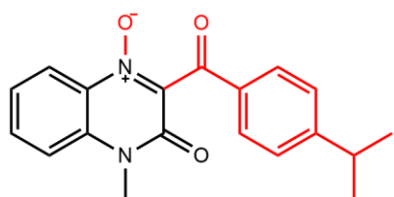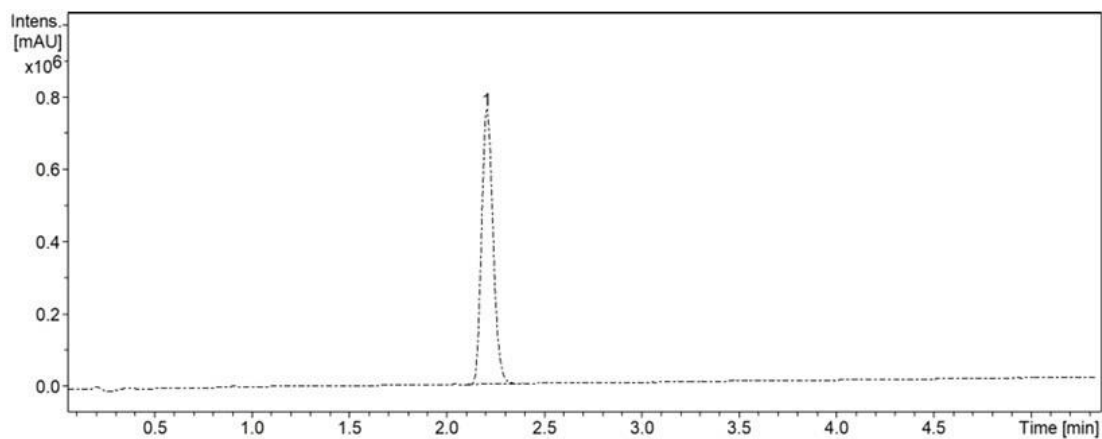

| # | RT [min] | Area    | Area Frac. % |
|---|----------|---------|--------------|
| 1 | 2.2      | 3122218 | 100.0        |

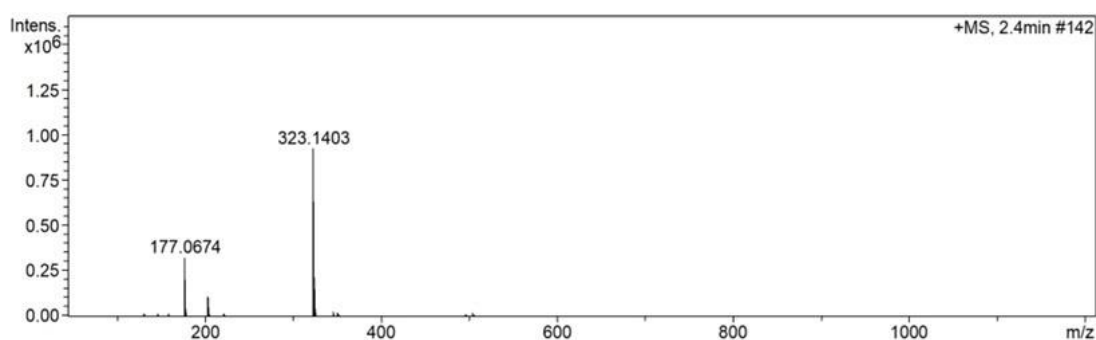

| Meas. m/z | # | Formula                                                       | m/z      | err [ppm] | rdb  | N-Rule | e <sub>1</sub> | Conf | mSigma |
|-----------|---|---------------------------------------------------------------|----------|-----------|------|--------|----------------|------|--------|
| 323.1403  | 1 | C <sub>19</sub> H <sub>19</sub> N <sub>2</sub> O <sub>3</sub> | 323.1390 | -4.0      | 11.5 | ok     | even           |      | 11.70  |
|           | 2 | C <sub>24</sub> H <sub>19</sub> O                             | 323.1430 | 8.4       | 15.5 | ok     | even           |      | 15.47  |
|           | 3 | C <sub>15</sub> H <sub>15</sub> N <sub>8</sub> O              | 323.1363 | -12.3     | 12.5 | ok     | even           |      | 24.68  |

**HPLC Condition: Column:** Agilent Zorbax SB C18, 2.1\*50 mm, 1.8 um

**Eluent:** ACN/H<sub>2</sub>O, A % 0-5-7 min, 30-70-70 %

**Flow rate:** 0.7ml/min

**Detection:** UV254nm

**3af**

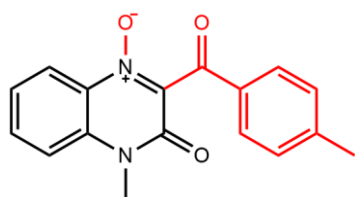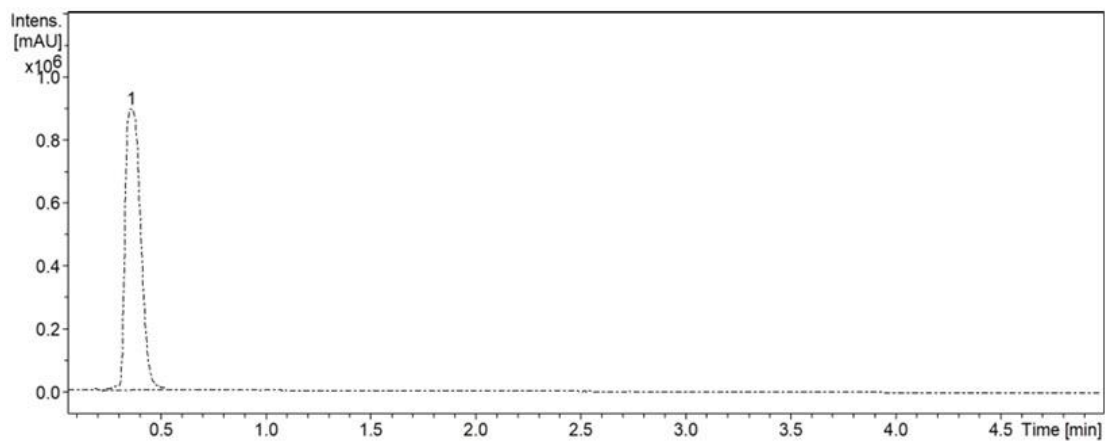

| # | RT [min] | Area    | Area Frac. % |
|---|----------|---------|--------------|
| 1 | 0.4      | 4626391 | 100.0        |

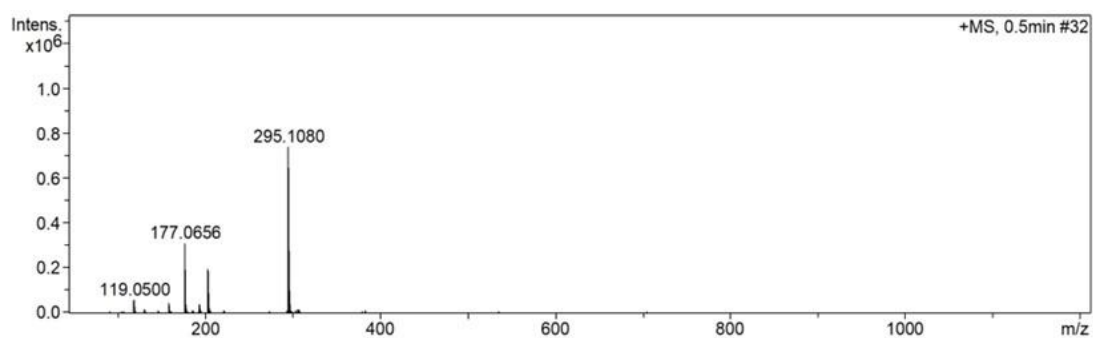

| Meas. m/z | # | Formula           | m/z      | err [ppm] | rdb  | N-Rule | e <sub>j</sub> | Conf | mSigma |
|-----------|---|-------------------|----------|-----------|------|--------|----------------|------|--------|
| 295.1080  | 1 | C 13 H 11 N 8 O   | 295.1050 | -10.2     | 12.5 | ok     | even           |      | 9.87   |
|           | 2 | C 17 H 15 N 2 O 3 | 295.1077 | -1.1      | 11.5 | ok     | even           |      | 20.78  |
|           | 3 | C 22 H 15 O       | 295.1117 | 12.5      | 15.5 | ok     | even           |      | 47.81  |

**HPLC Condition: Column:** Agilent Zorbax SB C18, 2.1\*50 mm, 1.8 um

**Eluent:** ACN/H<sub>2</sub>O, A % 0-5-7 min, 30-70-70 %

**Flow rate:** 0.7ml/min

**Detection:** UV254nm

3ag

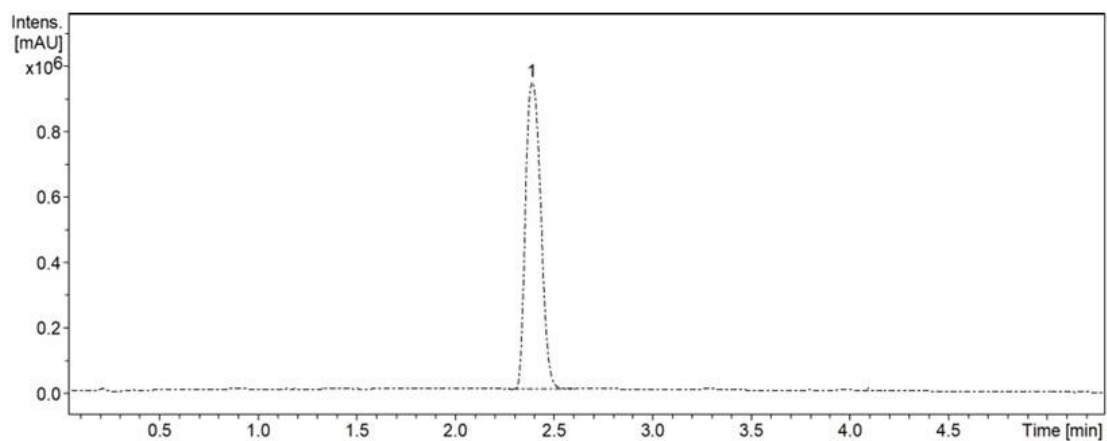

| # | RT [min] | Area    | Area Frac. % |
|---|----------|---------|--------------|
| 1 | 2.4      | 4944403 | 100.0        |

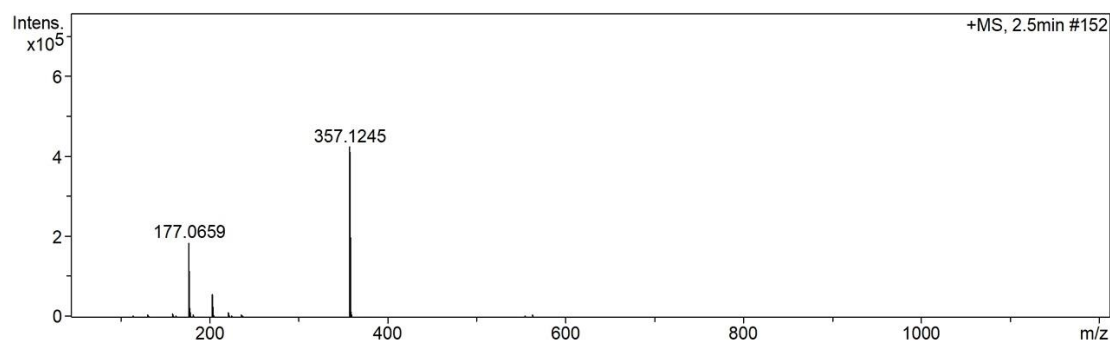

| Meas. m/z | # | Formula           | m/z      | err [ppm] | rdb  | N-Rule | e <sub>i</sub> | Conf | mSigma |
|-----------|---|-------------------|----------|-----------|------|--------|----------------|------|--------|
| 357.1245  | 1 | C 22 H 17 N 2 O 3 | 357.1234 | -3.1      | 15.5 | ok     | even           |      | 5.48   |
|           | 2 | C 18 H 13 N 8 O   | 357.1207 | -10.6     | 16.5 | ok     | even           |      | 18.74  |
|           | 3 | C 27 H 17 O       | 357.1274 | 8.1       | 19.5 | ok     | even           |      | 18.89  |

**HPLC Condition: Column:** Agilent Zorbax SB C18, 2.1\*50 mm, 1.8 um

**Eluent:** ACN/H<sub>2</sub>O, A % 0-5-7 min, 30-70-70 %

**Flow rate:** 0.7ml/min

**Detection:** UV254nm

### 3ah

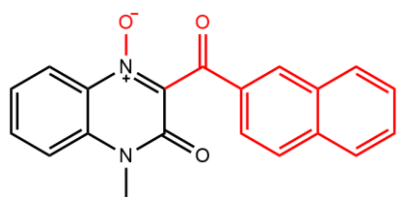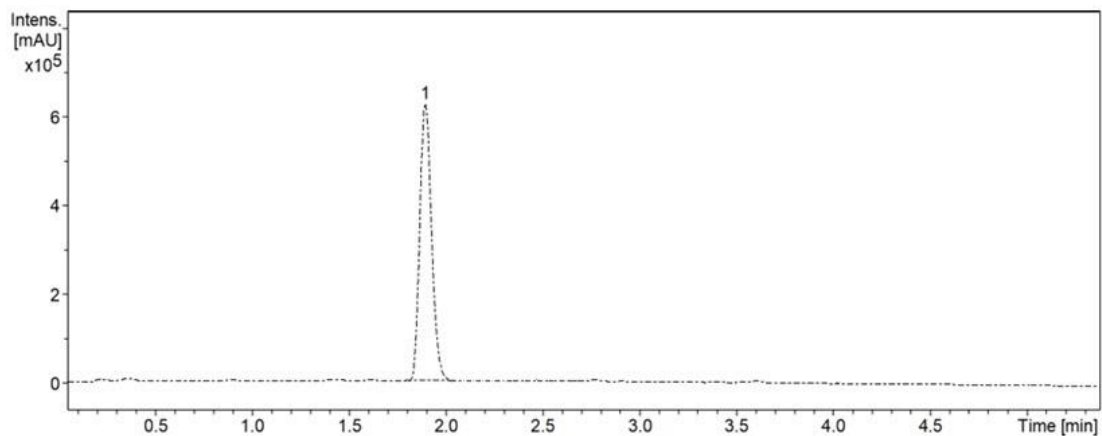

| # | RT [min] | Area    | Area Frac. % |
|---|----------|---------|--------------|
| 1 | 1.9      | 2560187 | 100.0        |

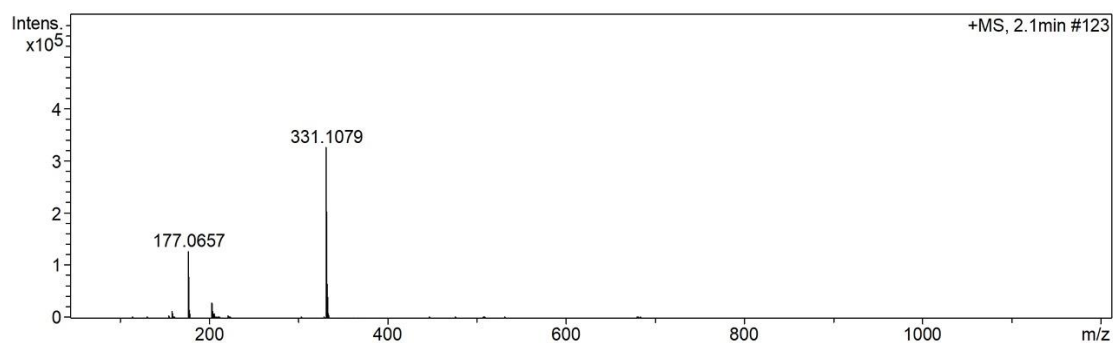

| Meas. m/z | # | Formula                                                       | m/z      | err [ppm] | rdb  | N-Rule | e <sub>1</sub> | Conf | mSigma |
|-----------|---|---------------------------------------------------------------|----------|-----------|------|--------|----------------|------|--------|
| 331.1079  | 1 | C <sub>16</sub> H <sub>11</sub> N <sub>2</sub> O              | 331.1050 | -8.7      | 15.5 | ok     | even           |      | 4.81   |
|           | 2 | C <sub>20</sub> H <sub>15</sub> N <sub>2</sub> O <sub>3</sub> | 331.1077 | -0.6      | 14.5 | ok     | even           |      | 15.14  |
|           | 3 | C <sub>25</sub> H <sub>15</sub> O                             | 331.1117 | 11.6      | 18.5 | ok     | even           |      | 42.24  |

**HPLC Condition: Column:** Agilent Zorbax SB C18, 2.1\*50 mm, 1.8 um

**Eluent:** ACN/H<sub>2</sub>O, A % 0-5-7 min, 30-70-70 %

**Flow rate:** 0.7ml/min

**Detection:** UV254nm

3ai

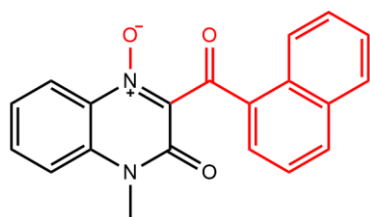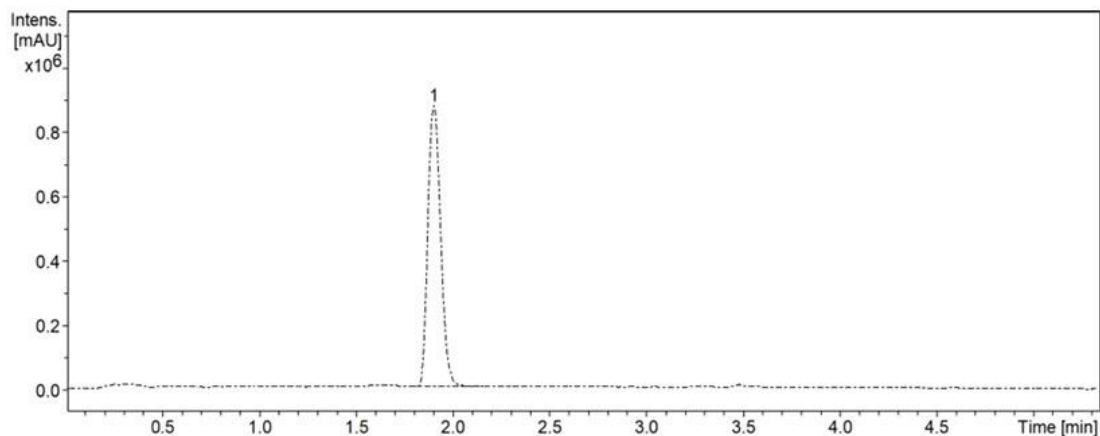

| # | RT [min] | Area    | Area Frac. % |
|---|----------|---------|--------------|
| 1 | 1.9      | 3911626 | 100.0        |

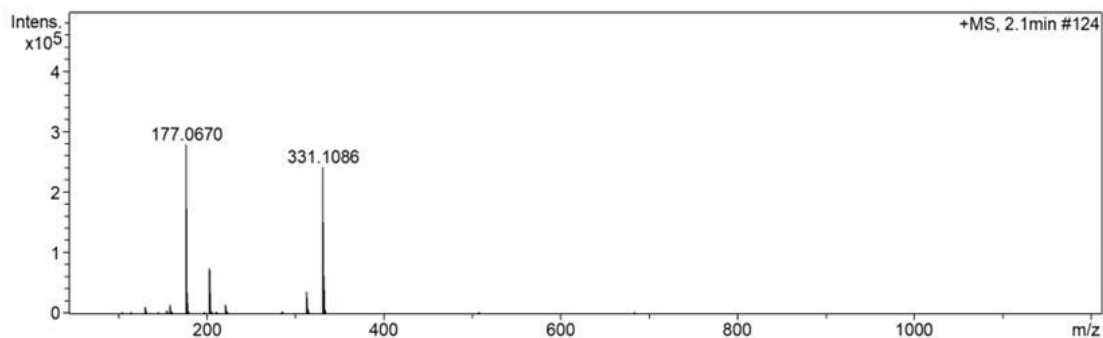

| Meas. m/z | # | Formula           | m/z      | err [ppm] | rdb  | N-Rule | e <sub>1</sub> | Conf | mSigma |
|-----------|---|-------------------|----------|-----------|------|--------|----------------|------|--------|
| 331.1086  | 1 | C 25 H 15 O       | 331.1117 | 9.4       | 18.5 | ok     | even           |      | 7.74   |
|           | 2 | C 20 H 15 N 2 O 3 | 331.1077 | -2.7      | 14.5 | ok     | even           |      | 19.38  |

**HPLC Condition: Column:** Agilent Zorbax SB C18, 2.1\*50 mm, 1.8 um

**Eluent:** ACN/H<sub>2</sub>O, A % 0-5-7 min, 30-70-70 %

**Flow rate:** 0.7ml/min

**Detection:** UV254nm

3aj

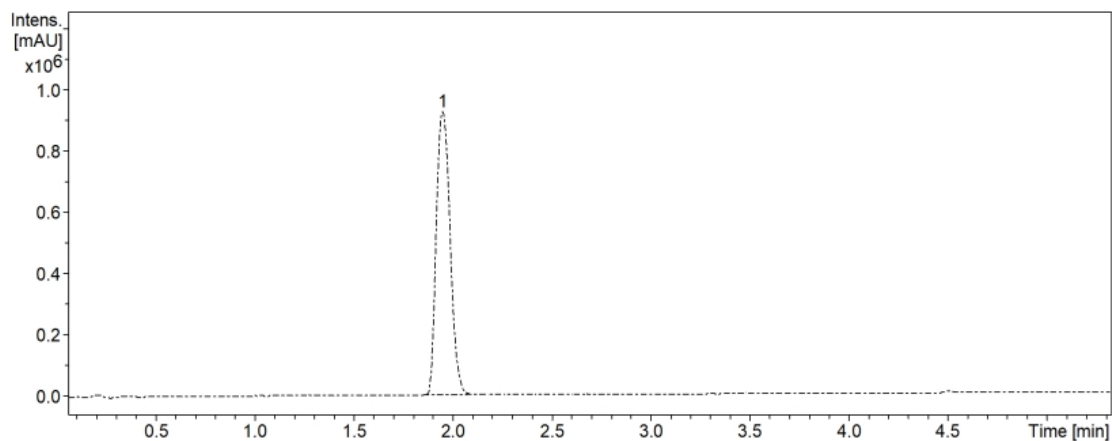

| # | RT [min] | Area    | Area Frac. % |
|---|----------|---------|--------------|
| 1 | 1.9      | 4500409 | 100.0        |

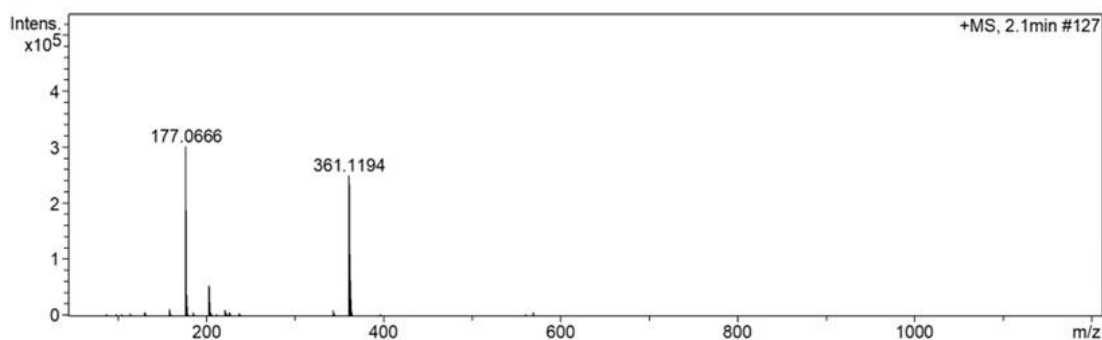

| Meas. m/z | # | Formula                                                       | m/z      | err [ppm] | rdb  | N-Rule | e <sub>i</sub> | Conf | mSigma |
|-----------|---|---------------------------------------------------------------|----------|-----------|------|--------|----------------|------|--------|
| 361.1194  | 1 | C <sub>26</sub> H <sub>17</sub> O <sub>2</sub>                | 361.1223 | 8.2       | 18.5 | ok     | even           |      | 7.14   |
|           | 2 | C <sub>22</sub> H <sub>13</sub> N <sub>6</sub>                | 361.1196 | 0.7       | 19.5 | ok     | even           |      | 7.93   |
|           | 3 | C <sub>21</sub> H <sub>17</sub> N <sub>2</sub> O <sub>4</sub> | 361.1183 | -3.0      | 14.5 | ok     | even           |      | 20.42  |

**HPLC Condition: Column:** Agilent Zorbax SB C18, 2.1\*50 mm, 1.8 um

**Eluent:** ACN/H<sub>2</sub>O, A % 0-5-7 min, 30-70-70 %

**Flow rate:** 0.7ml/min

**Detection:** UV254nm



3ak

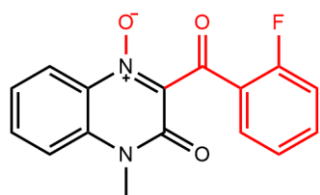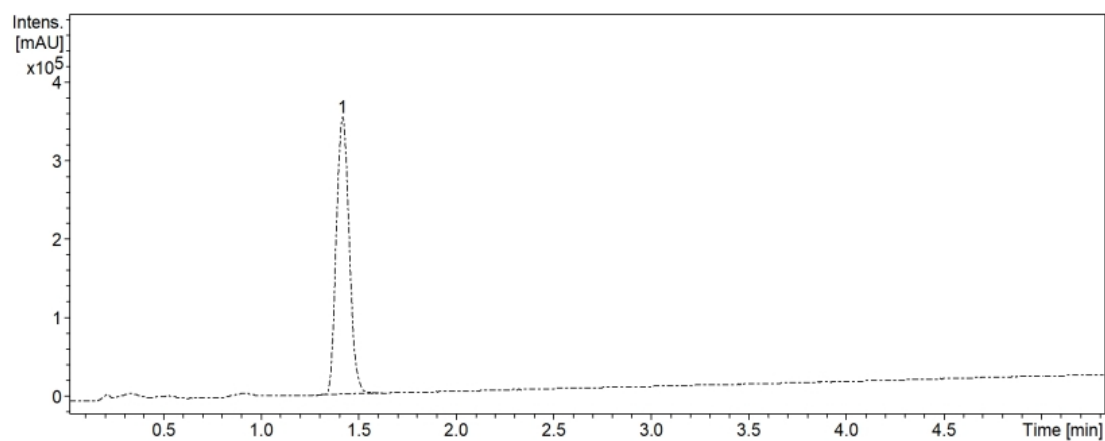

| # | RT [min] | Area    | Area Frac. % |
|---|----------|---------|--------------|
| 1 | 1.3      | 1632628 | 100.0        |

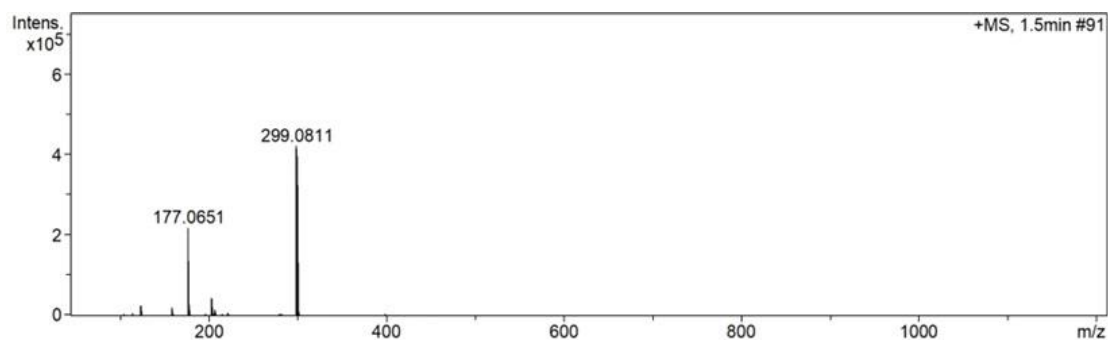

| Meas. m/z | # | Formula                                                        | m/z      | err [ppm] | rdb  | N-Rule | e <sub>i</sub> Conf | mSigma |
|-----------|---|----------------------------------------------------------------|----------|-----------|------|--------|---------------------|--------|
| 299.0811  | 1 | C <sub>19</sub> H <sub>11</sub> N <sub>2</sub> O <sub>2</sub>  | 299.0815 | 1.4       | 15.5 | ok     | even                | 1.70   |
|           | 2 | C <sub>15</sub> H <sub>7</sub> N <sub>8</sub>                  | 299.0788 | -7.6      | 16.5 | ok     | even                | 12.48  |
|           | 3 | C <sub>16</sub> H <sub>12</sub> FN <sub>2</sub> O <sub>3</sub> | 299.0826 | 5.2       | 11.5 | ok     | even                | 17.81  |
|           | 4 | C <sub>14</sub> H <sub>11</sub> N <sub>4</sub> O <sub>4</sub>  | 299.0775 | -12.1     | 11.5 | ok     | even                | 25.95  |

**HPLC Condition: Column:** Agilent Zorbax SB C18, 2.1\*50 mm, 1.8 um

**Eluent:** ACN/H<sub>2</sub>O, A % 0-5-7 min, 30-70-70 %

**Flow rate:** 0.7ml/min

**Detection:** UV254nm

3al

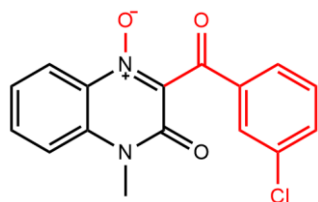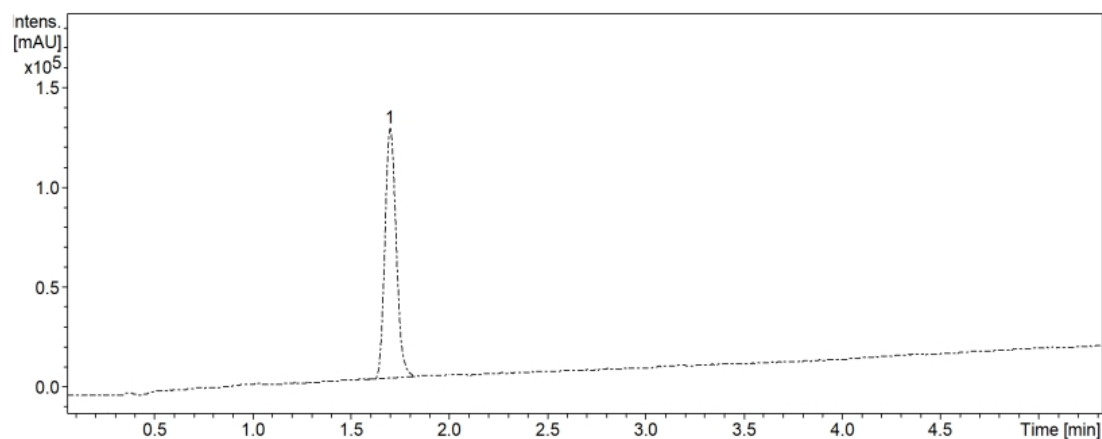

| # | RT [min] | Area   | Area Frac. % |
|---|----------|--------|--------------|
| 1 | 1.7      | 500739 | 100.0        |

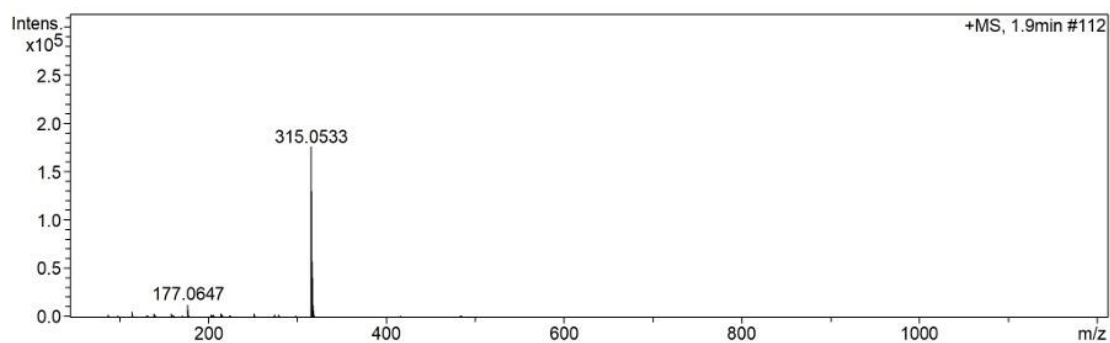

| Meas. m/z | # | Formula              | m/z      | err [ppm] | rdb  | N-Rule | e <sub>i</sub> Conf | mSigma |
|-----------|---|----------------------|----------|-----------|------|--------|---------------------|--------|
| 315.0533  | 1 | C 12 H 8 Cl N 8 O    | 315.0504 | -9.2      | 12.5 | ok     | even                | 5.25   |
|           | 2 | C 16 H 12 Cl N 2 O 3 | 315.0531 | -0.7      | 11.5 | ok     | even                | 15.18  |
|           | 3 | C 21 H 12 Cl O       | 315.0571 | 12.1      | 15.5 | ok     | even                | 36.45  |
|           | 4 | C 16 H 11 O 7        | 315.0499 | -10.7     | 11.5 | ok     | even                | 173.59 |
|           | 5 | C 9 H 15 O 12        | 315.0558 | 7.9       | 2.5  | ok     | even                | 174.71 |
|           | 6 | C 10 H 11 N 4 O 8    | 315.0571 | 12.2      | 7.5  | ok     | even                | 176.68 |
|           | 7 | C 17 H 7 N 4 O 3     | 315.0513 | -6.5      | 16.5 | ok     | even                | 177.43 |
|           | 8 | C 22 H 7 N 2 O       | 315.0553 | 6.3       | 20.5 | ok     | even                | 181.48 |

**HPLC Condition: Column:** Agilent Zorbax SB C18, 2.1\*50 mm, 1.8 um

**Eluent:** ACN/H<sub>2</sub>O, A % 0-5-7 min, 30-70-70 %

**Flow rate:** 0.7ml/min

**Detection:** UV254nm

### 3ba

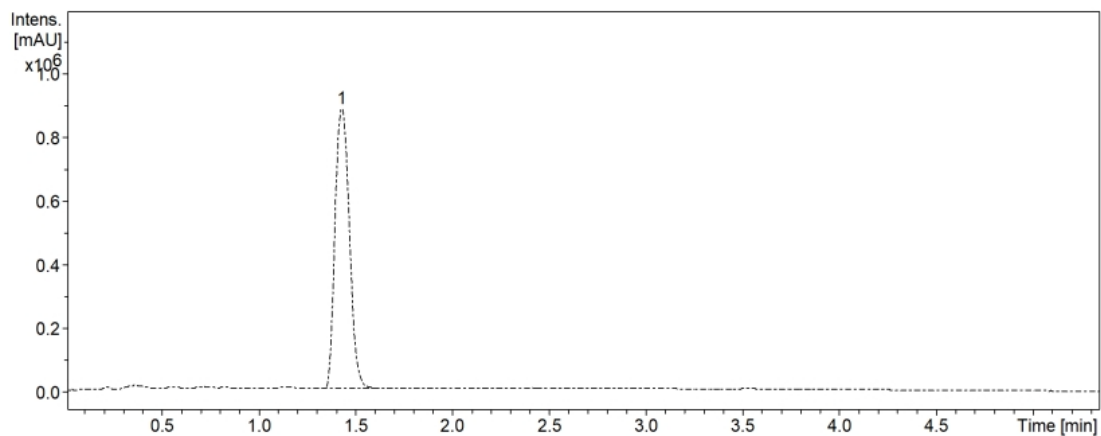

| # | RT [min] | Area    | Area Frac. % |
|---|----------|---------|--------------|
| 1 | 1.4      | 4528991 | 100.0        |

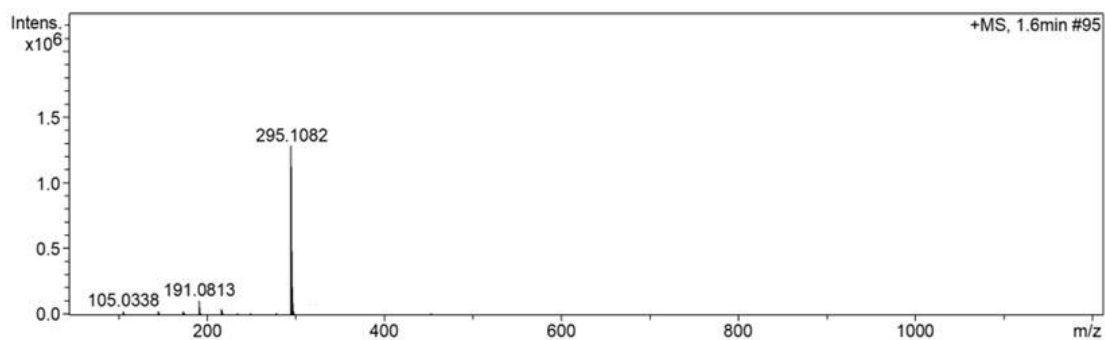

| Meas. m/z | # | Formula                                                       | m/z      | err [ppm] | rdb  | N-Rule | e <sub>i</sub> | Conf | mSigma |
|-----------|---|---------------------------------------------------------------|----------|-----------|------|--------|----------------|------|--------|
| 295.1082  | 1 | C <sub>17</sub> H <sub>15</sub> N <sub>2</sub> O <sub>3</sub> | 295.1077 | -1.5      | 11.5 | ok     | even           |      | 4.07   |
|           | 2 | C <sub>13</sub> H <sub>11</sub> N <sub>8</sub> O              | 295.1050 | -10.6     | 12.5 | ok     | even           |      | 10.23  |
|           | 3 | C <sub>22</sub> H <sub>15</sub> O                             | 295.1117 | 12.1      | 15.5 | ok     | even           |      | 31.06  |

**HPLC Condition: Column:** Agilent Zorbax SB C18, 2.1\*50 mm, 1.8 um

**Eluent:** ACN/H<sub>2</sub>O, A % 0-5-7 min, 30-70-70 %

**Flow rate:** 0.7ml/min

**Detection:** UV254nm

3ca

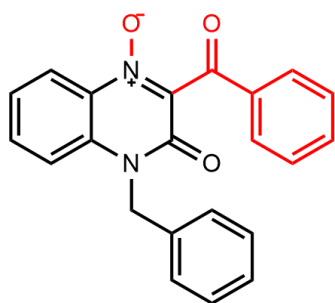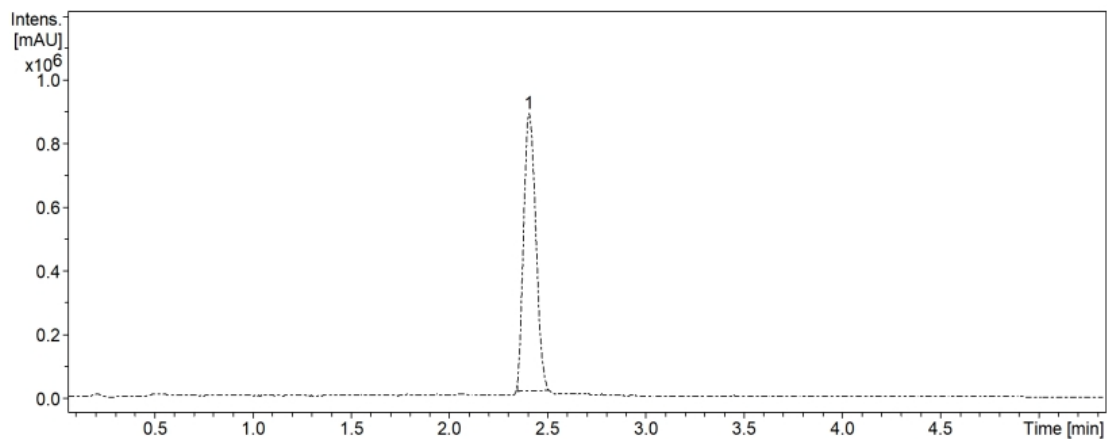

| # | RT [min] | Area    | Area Frac. % |
|---|----------|---------|--------------|
| 1 | 2.4      | 3783600 | 100.0        |

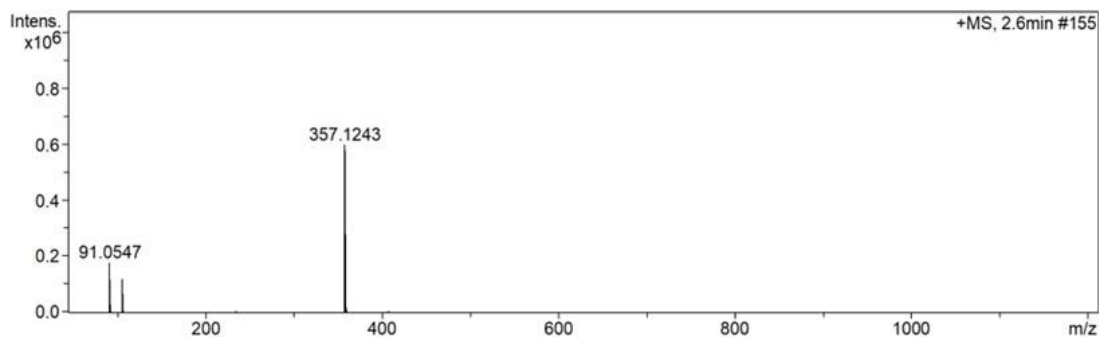

| Meas. m/z | # | Formula           | m/z      | err [ppm] | rdb  | N-Rule | e <sub>i</sub> | Conf | mSigma |
|-----------|---|-------------------|----------|-----------|------|--------|----------------|------|--------|
| 357.1243  | 1 | C 18 H 13 N 8 O   | 357.1207 | -10.1     | 16.5 | ok     | even           |      | 8.19   |
|           | 2 | C 22 H 17 N 2 O 3 | 357.1234 | -2.6      | 15.5 | ok     | even           |      | 8.92   |
|           | 3 | C 27 H 17 O       | 357.1274 | 8.7       | 19.5 | ok     | even           |      | 31.10  |

**HPLC Condition: Column:** Agilent Zorbax SB C18, 2.1\*50 mm, 1.8 um

**Eluent:** ACN/H<sub>2</sub>O, A % 0-5-7 min, 30-70-70 %

**Flow rate:** 0.7ml/min

**Detection:** UV254nm

**3da**

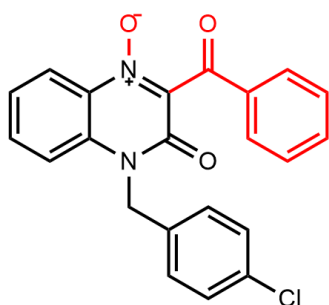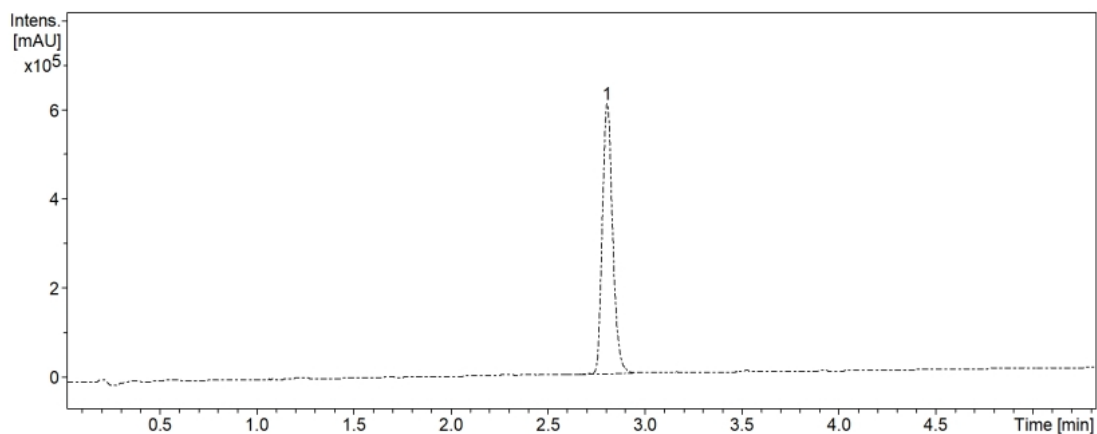

| # | RT [min] | Area    | Area Frac. % |
|---|----------|---------|--------------|
| 1 | 2.8      | 2244057 | 100.0        |

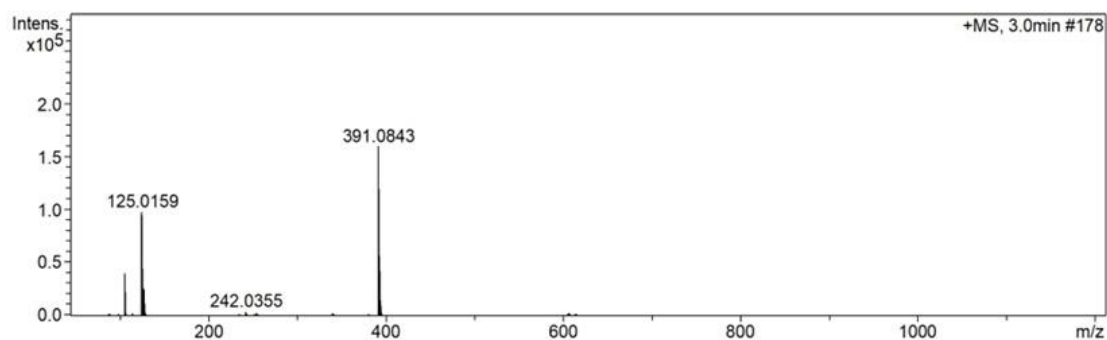

| Meas. m/z | # | Formula              | m/z      | err [ppm] | rdb  | N-Rule | e <sub>i</sub> Conf | mSigma |
|-----------|---|----------------------|----------|-----------|------|--------|---------------------|--------|
| 391.0843  | 1 | C 22 H 16 Cl N 2 O 3 | 391.0844 | 0.3       | 15.5 | ok     | even                | 4.30   |
|           | 2 | C 18 H 12 Cl N 8 O   | 391.0817 | -6.6      | 16.5 | ok     | even                | 7.55   |
|           | 3 | C 17 H 16 Cl N 4 O 5 | 391.0804 | -10.0     | 11.5 | ok     | even                | 17.75  |
|           | 4 | C 28 H 11 N 2 O      | 391.0866 | 5.9       | 24.5 | ok     | even                | 161.94 |
|           | 5 | C 15 H 19 O 12       | 391.0871 | 7.2       | 6.5  | ok     | even                | 165.71 |
|           | 6 | C 22 H 15 O 7        | 391.0812 | -7.8      | 15.5 | ok     | even                | 180.18 |
|           | 7 | C 23 H 11 N 4 O 3    | 391.0826 | -4.4      | 20.5 | ok     | even                | 181.99 |

**HPLC Condition: Column:** Agilent Zorbax SB C18, 2.1\*50 mm, 1.8 um

**Eluent:** ACN/H<sub>2</sub>O, A % 0-5-7 min, 30-70-70 %

**Flow rate:** 0.7ml/min

**Detection:** UV254nm

3ea

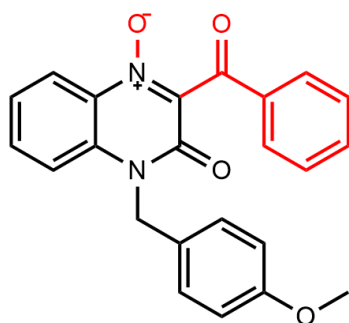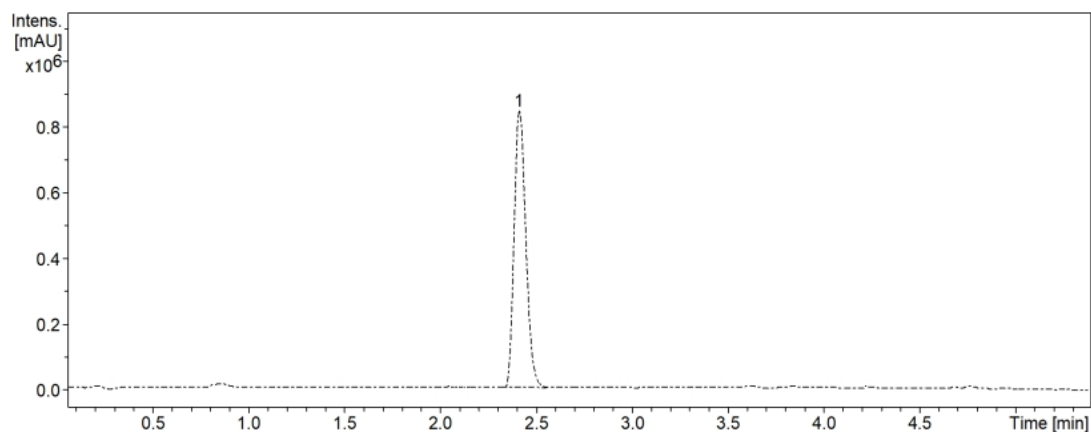

| # | RT [min] | Area    | Area Frac. % |
|---|----------|---------|--------------|
| 1 | 2.4      | 3576707 | 100.0        |

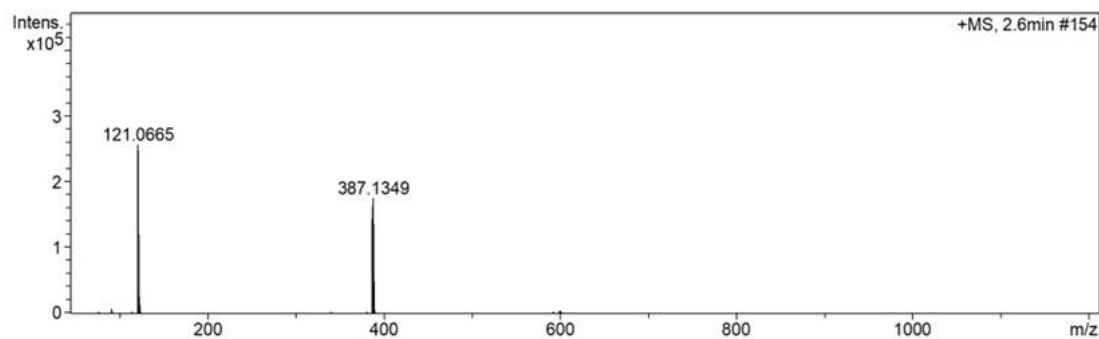

| Meas. m/z | # | Formula                                                       | m/z      | err [ppm] | rdB  | N-Rule | e <sub>i</sub> | Conf | mSigma |
|-----------|---|---------------------------------------------------------------|----------|-----------|------|--------|----------------|------|--------|
| 387.1349  | 1 | C <sub>23</sub> H <sub>19</sub> N <sub>2</sub> O <sub>4</sub> | 387.1339 | -2.6      | 15.5 | ok     | even           |      | 6.56   |
|           | 2 | C <sub>19</sub> H <sub>15</sub> N <sub>8</sub> O <sub>2</sub> | 387.1312 | -9.5      | 16.5 | ok     | even           |      | 8.06   |
|           | 3 | C <sub>24</sub> H <sub>15</sub> N <sub>6</sub>                | 387.1353 | 0.9       | 20.5 | ok     | even           |      | 21.36  |
|           | 4 | C <sub>28</sub> H <sub>19</sub> O <sub>2</sub>                | 387.1380 | 7.8       | 19.5 | ok     | even           |      | 29.31  |

**HPLC Condition: Column:** Agilent Zorbax SB C18, 2.1\*50 mm, 1.8 um

**Eluent:** ACN/H<sub>2</sub>O, A % 0-5-7 min, 30-70-70 %

**Flow rate:** 0.7ml/min

**Detection:** UV254nm

3fa

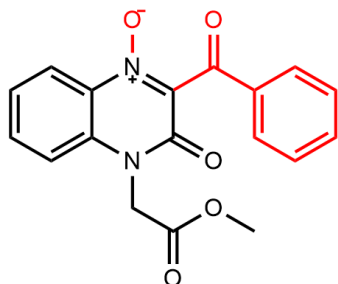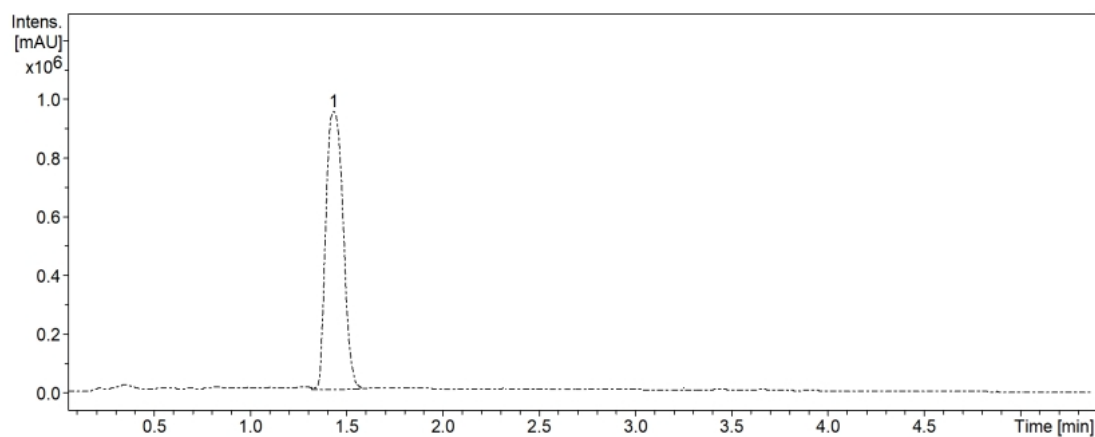

| # | RT [min] | Area    | Area Frac. % |
|---|----------|---------|--------------|
| 1 | 1.4      | 5894304 | 100.0        |

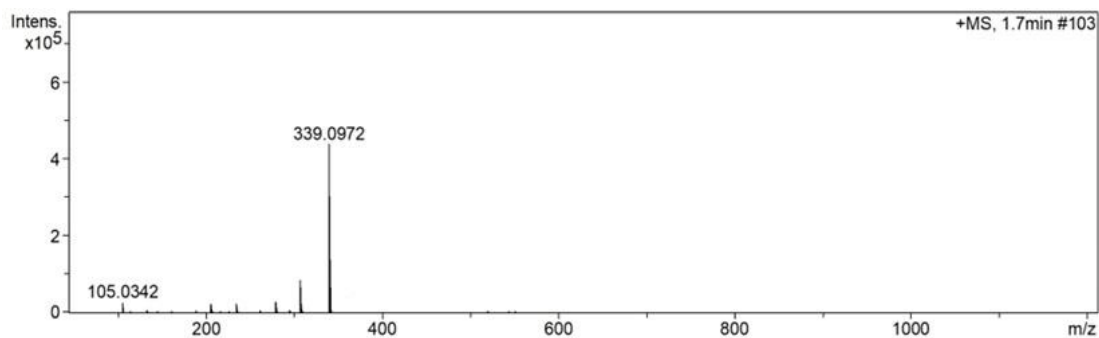

| Meas. m/z | # | Formula                                                       | m/z      | err [ppm] | rdb  | N-Rule | e <sub>1</sub> | Conf | mSigma |
|-----------|---|---------------------------------------------------------------|----------|-----------|------|--------|----------------|------|--------|
| 339.0972  | 1 | C <sub>19</sub> H <sub>11</sub> N <sub>6</sub> O              | 339.0989 | 5.1       | 17.5 | ok     | even           |      | 24.60  |
|           | 2 | C <sub>18</sub> H <sub>15</sub> N <sub>2</sub> O <sub>5</sub> | 339.0975 | 1.1       | 12.5 | ok     | even           |      | 38.25  |

**HPLC Condition: Column:** Agilent Zorbax SB C18, 2.1\*50 mm, 1.8 um

**Eluent:** ACN/H<sub>2</sub>O, A % 0-5-7 min, 30-70-70 %

**Flow rate:** 0.7ml/min

**Detection:** UV254nm

3ga

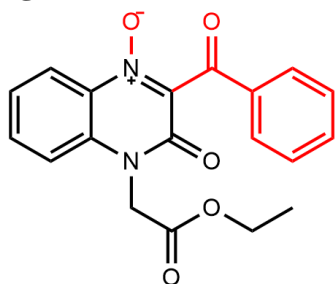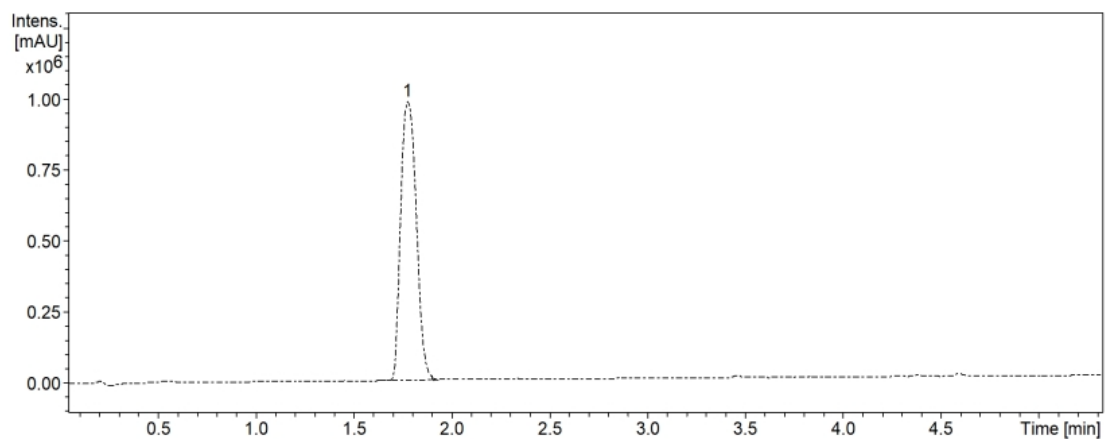

| # | RT [min] | Area    | Area Frac. % |
|---|----------|---------|--------------|
| 1 | 1.8      | 5444652 | 100.0        |

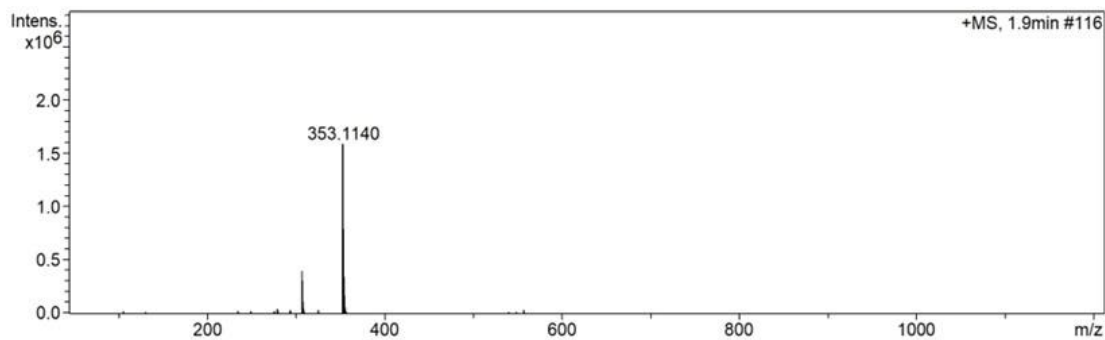

| Meas. m/z | # | Formula                                                       | m/z      | err [ppm] | rdb  | N-Rule | e <sub>i</sub> | Conf | mSigma |
|-----------|---|---------------------------------------------------------------|----------|-----------|------|--------|----------------|------|--------|
| 353.1140  | 1 | C <sub>19</sub> H <sub>17</sub> N <sub>2</sub> O <sub>5</sub> | 353.1132 | -2.1      | 12.5 | ok     | even           |      | 5.73   |
|           | 2 | C <sub>20</sub> H <sub>13</sub> N <sub>6</sub> O              | 353.1145 | 1.6       | 17.5 | ok     | even           |      | 13.13  |
|           | 3 | C <sub>15</sub> H <sub>13</sub> N <sub>8</sub> O <sub>3</sub> | 353.1105 | -9.7      | 13.5 | ok     | even           |      | 18.43  |
|           | 4 | C <sub>24</sub> H <sub>17</sub> O <sub>3</sub>                | 353.1172 | 9.3       | 16.5 | ok     | even           |      | 23.23  |

**HPLC Condition: Column:** Agilent Zorbax SB C18, 2.1\*50 mm, 1.8 um

**Eluent:** ACN/H<sub>2</sub>O, A % 0-5-7 min, 30-70-70 %

**Flow rate:** 0.7ml/min

**Detection:** UV254nm



3ha

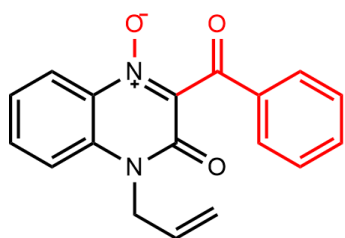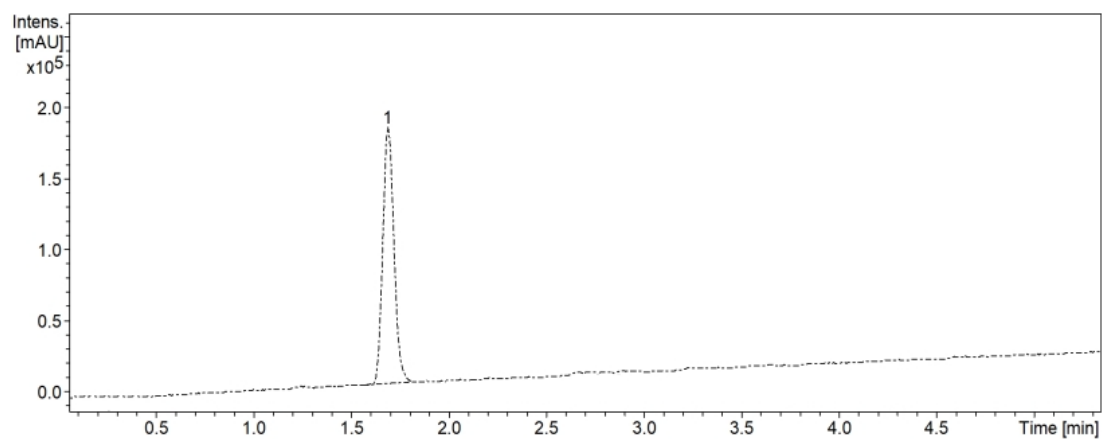

| # | RT [min] | Area   | Area Frac. % |
|---|----------|--------|--------------|
| 1 | 1.7      | 719665 | 100.0        |

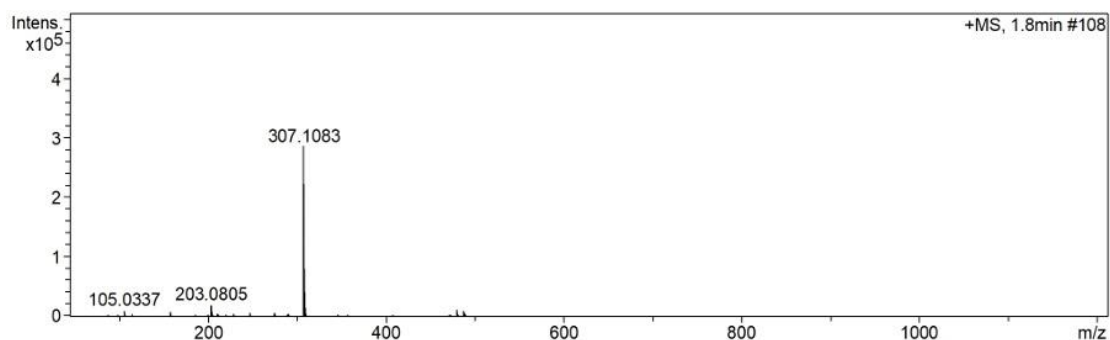

| Meas. m/z | # | Formula                                                       | m/z      | err [ppm] | rdb  | N-Rule | e <sub>i</sub> Conf | mSigma |
|-----------|---|---------------------------------------------------------------|----------|-----------|------|--------|---------------------|--------|
| 307.1083  | 1 | C <sub>14</sub> H <sub>11</sub> N <sub>2</sub> O              | 307.1050 | -10.7     | 13.5 | ok     | even                | 6.49   |
|           | 2 | C <sub>18</sub> H <sub>15</sub> N <sub>2</sub> O <sub>3</sub> | 307.1077 | -1.9      | 12.5 | ok     | even                | 7.76   |
|           | 3 | C <sub>23</sub> H <sub>15</sub> O                             | 307.1117 | 11.2      | 16.5 | ok     | even                | 34.80  |

**HPLC Condition: Column:** Agilent Zorbax SB C18, 2.1\*50 mm, 1.8 um

**Eluent:** ACN/H<sub>2</sub>O, A % 0-5-7 min, 30-70-70 %

**Flow rate:** 0.7ml/min

**Detection:** UV254nm

**3ia**

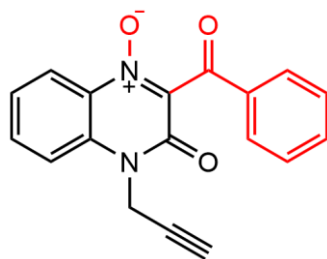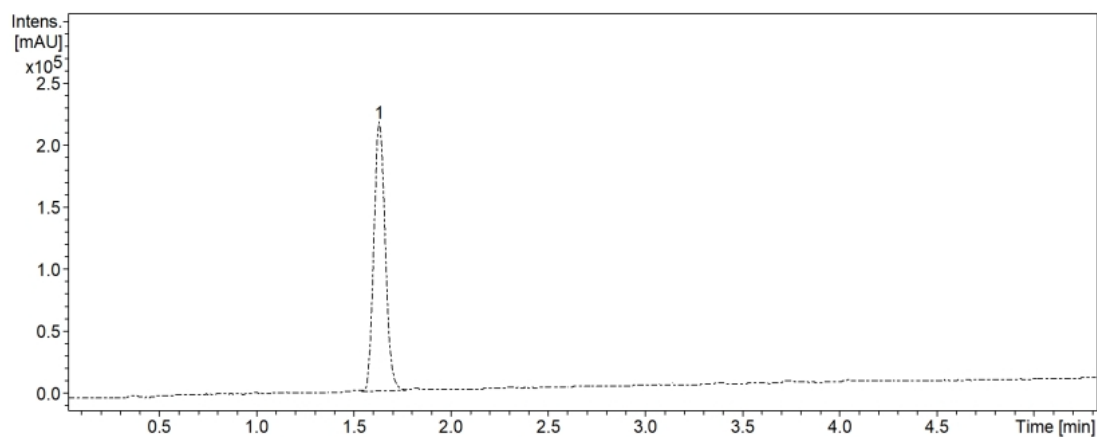

| # | RT [min] | Area   | Area Frac. % |
|---|----------|--------|--------------|
| 1 | 1.6      | 888263 | 100.0        |

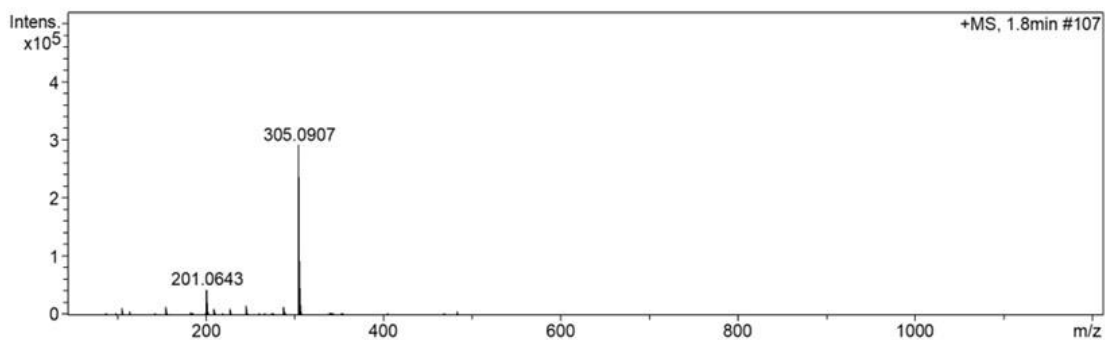

| Meas. m/z | # | Formula                                                       | m/z      | err [ppm] | rdb  | N-Rule | e <sub>i</sub> Conf | mSigma |
|-----------|---|---------------------------------------------------------------|----------|-----------|------|--------|---------------------|--------|
| 305.0907  | 1 | C <sub>18</sub> H <sub>13</sub> N <sub>2</sub> O <sub>3</sub> | 305.0921 | 4.5       | 13.5 | ok     | even                | 4.01   |
|           | 2 | C <sub>14</sub> H <sub>9</sub> N <sub>8</sub> O               | 305.0894 | -4.3      | 14.5 | ok     | even                | 9.81   |
|           | 3 | C <sub>13</sub> H <sub>13</sub> N <sub>4</sub> O <sub>5</sub> | 305.0880 | -8.7      | 9.5  | ok     | even                | 23.06  |
|           | 4 | C <sub>12</sub> H <sub>17</sub> O <sub>9</sub>                | 305.0867 | -13.1     | 4.5  | ok     | even                | 37.79  |

**HPLC Condition: Column:** Agilent Zorbax SB C18, 2.1\*50 mm, 1.8 um

**Eluent:** ACN/H<sub>2</sub>O, A % 0-5-7 min, 30-70-70 %

**Flow rate:** 0.7ml/min

**Detection:** UV254nm

3ja

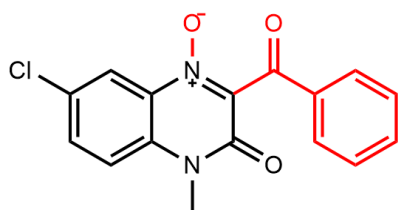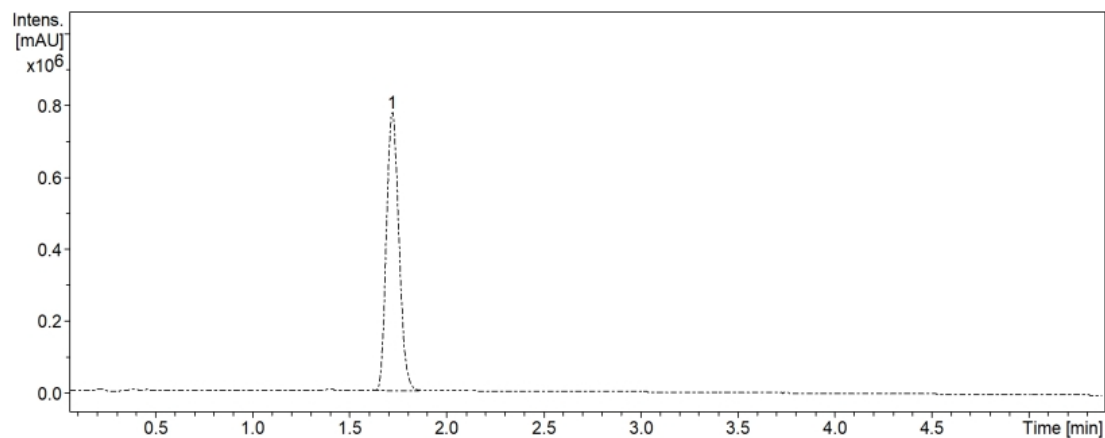

| # | RT [min] | Area    | Area Frac. % |
|---|----------|---------|--------------|
| 1 | 1.7      | 3469028 | 100.0        |

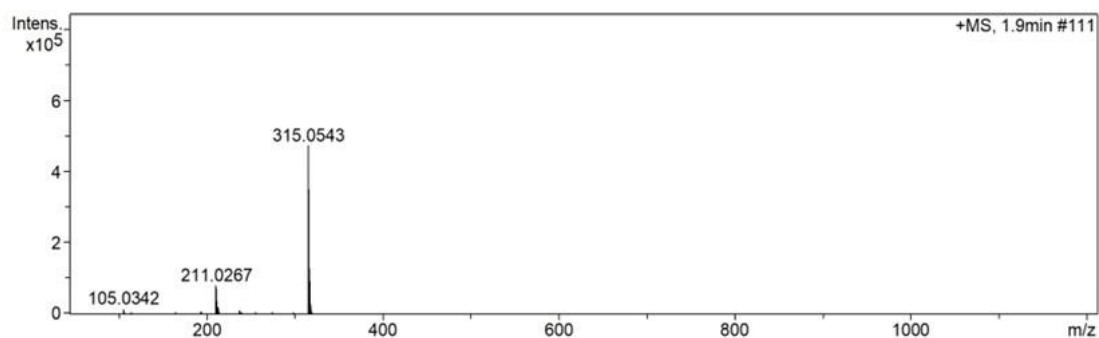

| Meas. m/z | # | Formula                                                         | m/z      | err [ppm] | rdb  | N-Rule | e <sub>i</sub> Conf | mSigma |
|-----------|---|-----------------------------------------------------------------|----------|-----------|------|--------|---------------------|--------|
| 315.0543  | 1 | C <sub>12</sub> H <sub>8</sub> ClN <sub>2</sub> O               | 315.0504 | -12.5     | 12.5 | ok     | even                | 30.70  |
|           | 2 | C <sub>16</sub> H <sub>12</sub> ClN <sub>2</sub> O <sub>3</sub> | 315.0531 | -3.9      | 11.5 | ok     | even                | 34.81  |
|           | 3 | C <sub>21</sub> H <sub>12</sub> ClO                             | 315.0571 | 8.8       | 15.5 | ok     | even                | 49.30  |
|           | 4 | C <sub>9</sub> H <sub>15</sub> O <sub>12</sub>                  | 315.0558 | 4.7       | 2.5  | ok     | even                | 141.96 |
|           | 5 | C <sub>10</sub> H <sub>11</sub> N <sub>4</sub> O <sub>8</sub>   | 315.0571 | 8.9       | 7.5  | ok     | even                | 143.70 |
|           | 6 | C <sub>17</sub> H <sub>7</sub> N <sub>4</sub> O <sub>3</sub>    | 315.0513 | -9.7      | 16.5 | ok     | even                | 145.25 |
|           | 7 | C <sub>22</sub> H <sub>7</sub> N <sub>2</sub> O                 | 315.0553 | 3.0       | 20.5 | ok     | even                | 150.93 |

**HPLC Condition: Column:** Agilent Zorbax SB C18, 2.1\*50 mm, 1.8 um

**Eluent:** ACN/H<sub>2</sub>O, A % 0-5-7 min, 30-70-70 %

**Flow rate:** 0.7ml/min

**Detection:** UV254nm

3ka

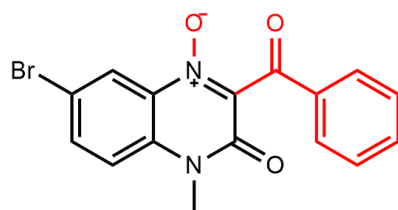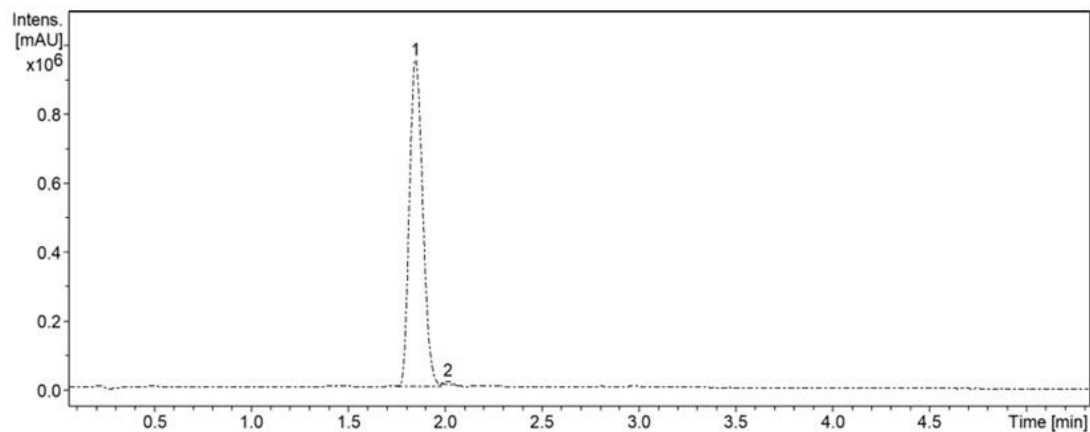

| # | RT [min] | Area    | Area Frac. % |
|---|----------|---------|--------------|
| 1 | 1.8      | 4552110 | 99.4         |
| 2 | 2.0      | 26249   | 0.6          |

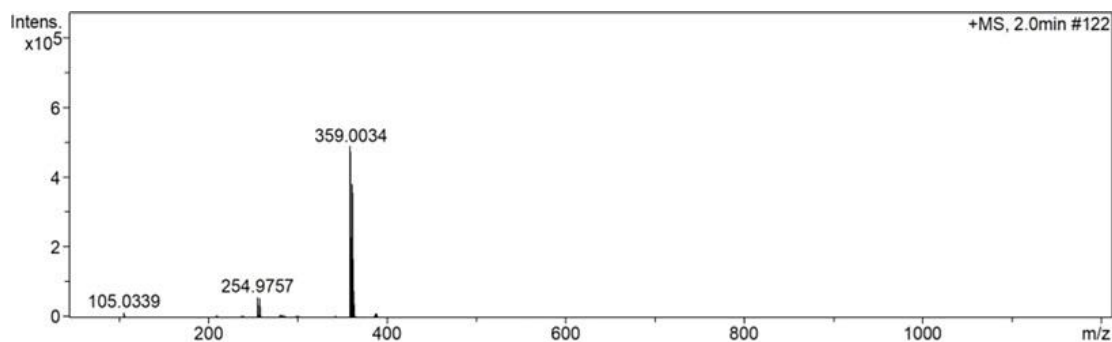

| Meas. m/z | # | Formula              | m/z      | err [ppm] | rdb  | N-Rule | e <sub>j</sub> | Conf | mSigma |
|-----------|---|----------------------|----------|-----------|------|--------|----------------|------|--------|
| 359.0034  | 1 | C 12 H 8 Br N 8 O    | 358.9999 | -9.8      | 12.5 | ok     | even           |      | 93.36  |
|           | 2 | C 16 H 12 Br N 2 O 3 | 359.0026 | -2.3      | 11.5 | ok     | even           |      | 97.65  |
|           | 3 | C 21 H 12 Br O       | 359.0066 | 8.9       | 15.5 | ok     | even           |      | 104.95 |
|           | 4 | C 16 H 7 O 10        | 359.0034 | -0.1      | 13.5 | ok     | even           |      | 379.37 |
|           | 5 | C 17 H 3 N 4 O 6     | 359.0047 | 3.6       | 18.5 | ok     | even           |      | 430.70 |
|           | 6 | C 12 H 3 N 6 O 8     | 359.0007 | -7.6      | 14.5 | ok     | even           |      | 432.78 |

**HPLC Condition: Column:** Agilent Zorbax SB C18, 2.1\*50 mm, 1.8 um

**Eluent:** ACN/H<sub>2</sub>O, A % 0-5-7 min, 30-70-70 %

**Flow rate:** 0.7ml/min

**Detection:** UV254nm

3la

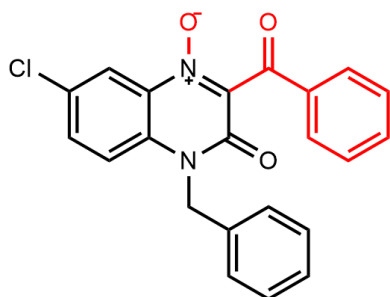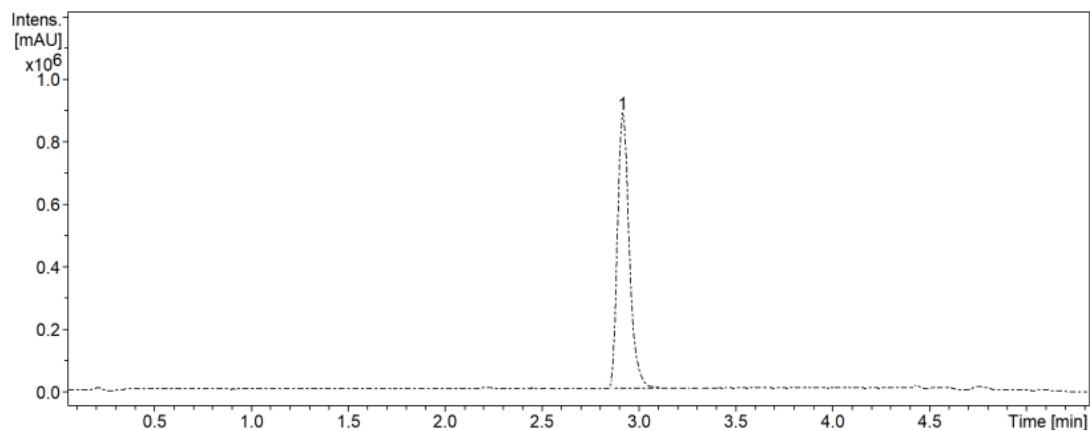

| # | RT [min] | Area    | Area Frac. % |
|---|----------|---------|--------------|
| 1 | 2.9      | 3607590 | 100.0        |

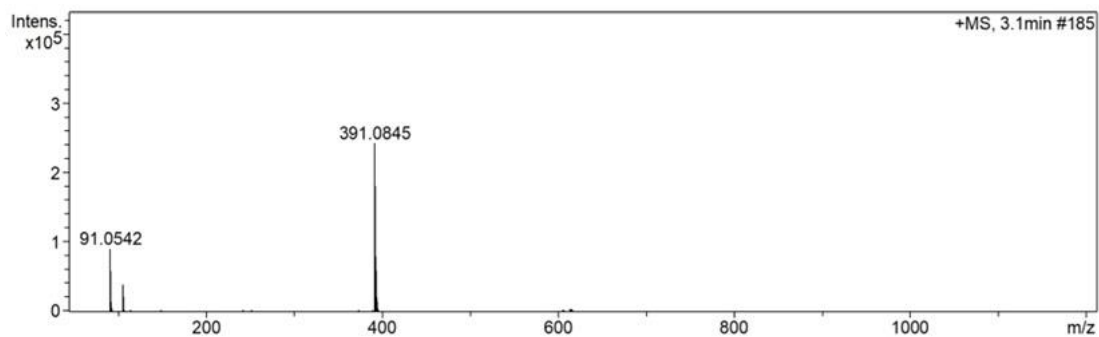

| Meas. m/z | # | Formula              | m/z      | err [ppm] | rdb  | N-Rule | e <sub>i</sub> Conf | mSigma |
|-----------|---|----------------------|----------|-----------|------|--------|---------------------|--------|
| 391.0845  | 1 | C 18 H 12 Cl N 8 O   | 391.0817 | -7.2      | 16.5 | ok     | even                | 13.59  |
|           | 2 | C 22 H 16 Cl N 2 O 3 | 391.0844 | -0.3      | 15.5 | ok     | even                | 14.08  |
|           | 3 | C 27 H 16 Cl O       | 391.0884 | 10.0      | 19.5 | ok     | even                | 28.06  |
|           | 4 | C 28 H 11 N 2 O      | 391.0866 | 5.3       | 24.5 | ok     | even                | 147.55 |
|           | 5 | C 22 H 15 O 7        | 391.0812 | -8.4      | 15.5 | ok     | even                | 162.76 |
|           | 6 | C 23 H 11 N 4 O 3    | 391.0826 | -5.0      | 20.5 | ok     | even                | 164.25 |
|           | 7 | C 16 H 15 N 4 O 8    | 391.0884 | 10.0      | 11.5 | ok     | even                | 170.65 |

**HPLC Condition:** Column: Agilent Zorbax SB C18, 2.1\*50 mm, 1.8 um

**Eluent:** ACN/H<sub>2</sub>O, A % 0-5-7 min, 30-70-70 %

**Flow rate:** 0.7ml/min

**Detection:** UV254nm

12

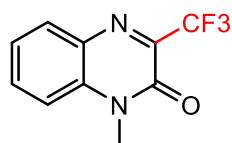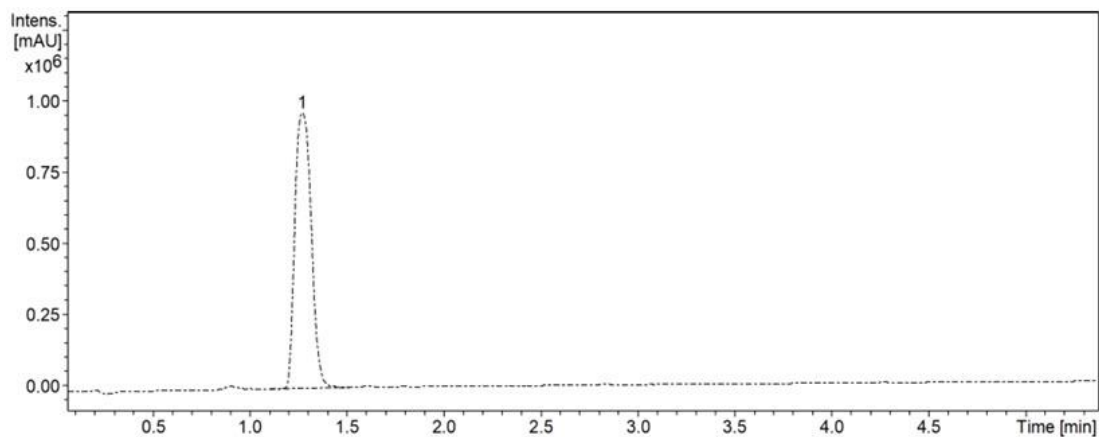

| # | RT [min] | Area    | Area Frac. % |
|---|----------|---------|--------------|
| 1 | 1.3      | 5715645 | 100.0        |

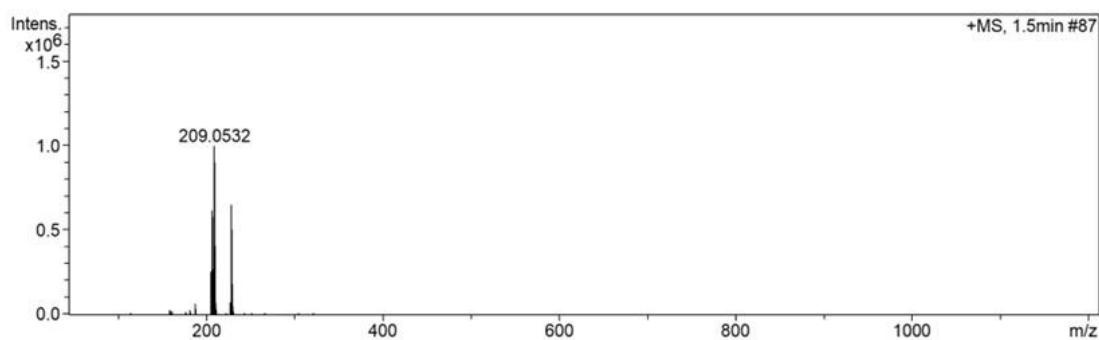

| Meas. m/z | #  | Formula                                                                     | m/z      | err [ppm] | rdb  | N-Rule | e <sub>i</sub> Conf | mSigma |
|-----------|----|-----------------------------------------------------------------------------|----------|-----------|------|--------|---------------------|--------|
| 229.0593  | 1  | C <sub>9</sub> H <sub>10</sub> FN <sub>2</sub> O <sub>4</sub>               | 229.0619 | 11.2      | 5.5  | ok     | even                | 3.24   |
|           | 2  | C <sub>7</sub> H <sub>9</sub> N <sub>4</sub> O <sub>5</sub>                 | 229.0567 | -11.3     | 5.5  | ok     | even                | 6.87   |
|           | 3  | C <sub>10</sub> H <sub>8</sub> F <sub>3</sub> N <sub>2</sub> O              | 229.0583 | -4.4      | 6.5  | ok     | even                | 7.94   |
|           | 4  | C <sub>8</sub> H <sub>5</sub> N <sub>8</sub> O                              | 229.0581 | -5.5      | 10.5 | ok     | even                | 9.44   |
|           | 5  | C <sub>5</sub> H <sub>6</sub> FN <sub>8</sub> O <sub>2</sub>                | 229.0592 | -0.5      | 6.5  | ok     | even                | 10.69  |
|           | 6  | C <sub>10</sub> H <sub>6</sub> FN <sub>6</sub>                              | 229.0632 | 17.1      | 10.5 | ok     | even                | 16.37  |
|           | 7  | C <sub>6</sub> H <sub>11</sub> F <sub>2</sub> N <sub>2</sub> O <sub>5</sub> | 229.0631 | 16.2      | 1.5  | ok     | even                | 17.20  |
|           | 8  | C <sub>12</sub> H <sub>9</sub> N <sub>2</sub> O <sub>3</sub>                | 229.0608 | 6.2       | 9.5  | ok     | even                | 20.68  |
|           | 9  | C <sub>6</sub> H <sub>13</sub> O <sub>9</sub>                               | 229.0554 | -17.2     | 0.5  | ok     | even                | 22.20  |
|           | 10 | C <sub>4</sub> H <sub>10</sub> FN <sub>4</sub> O <sub>6</sub>               | 229.0579 | -6.3      | 1.5  | ok     | even                | 25.51  |
|           | 11 | C <sub>13</sub> H <sub>7</sub> F <sub>2</sub> N <sub>2</sub>                | 229.0572 | -9.4      | 10.5 | ok     | even                | 26.60  |

**HPLC Condition: Column:** Agilent Zorbax SB C18, 2.1\*50 mm, 1.8 um

**Eluent:** ACN/H<sub>2</sub>O, A % 0-5-7 min, 30-70-70 %

**Flow rate:** 0.7ml/min

**Detection:** UV254nm
